# Supplementary material for: Treatment of mine water for the fast removal of zinc and lead by wood ash amended biochar
Source: Royal Society of Chemistry journal article supplement (doi:10.1039/d2va00085g), 2022-01-01
Supplement: d2va00085g1.xlsx [file d2va00085g1.xlsx]

## Sheet: Lowe Boat Level Zn values
	Zn	Zn mg/L removed	% Zn removed	St Dev
1 min 1	0.2475	10.2712	0.976471
1 min 2	0.275	10.2437	0.973856
1 min 3	0.37125	10.1475	0.964706
1 min av	0.297917	10.2208	0.971678	0.00504394
5 min 1	0.0825	10.4362	0.992157
5 min 2	0.15125	10.3675	0.985621
5 min 3	0.12375	10.395	0.988235
5 min av	0.119167	10.3996	0.988671	0.00268602
15 min 1	0.17875	10.34	0.983007
15 min 2	0.01375	10.505	0.998693
15 min 3	0.055	10.4637	0.994771
15 min av	0.0825	10.4362	0.992157	0.00666538
30 min 1	0.1925	10.3262	0.981699
30 min 2	0.09625	10.4225	0.99085
30 min 3	0.0825	10.4362	0.992157
30 min av	0.12375	10.395	0.988235	0.00465232
1 hr 1	0.0275	10.4912	0.997386
1 hr 2	0	10.5187	1
1 hr 3	0.01375	10.505	0.998693
1 hr av	0.00458333	10.5142	0.999564	0.00106732
24 hr 1	0	10.5187	1
24 hr 2	0	10.5187	1
24 hr3	0	10.5187	1
24 hr av	0	10.5187	1	0
no bc 1	10.3812	0.1375	0.0130719
no bc 2	10.67	-0.15125	-0.0143791
no bc 3	10.505	0.01375	0.00130719
no bc av	10.5187	0	0

## Sheet: Trib 1 Zn and Pb values
	Zn	Zn mg/L removed	% Zn removed	St Dev		Pb	Pb mg/L removed	% Pb removed	St Dev
1 min 1	0.34375	9.99625	0.966755			0.26125	1.31542	0.834302
1 min 2	0.165	10.175	0.984043			0.15125	1.42542	0.90407
1 min 3	0.33	10.01	0.968085			0.23375	1.34292	0.851744
1 min av	0.279583	10.0604	0.972961	0.00785463		0.215417	1.36125	0.863372	0.0296455
5 min 1	0.28875	10.0513	0.972074			0.22	1.35667	0.860465
5 min 2	0.39875	9.94125	0.961436			0.26125	1.31542	0.834302
5 min 3	1.00375	9.33625	0.902926			0.55	1.02667
5 min av	0.56375	9.77625	0.945479	0.0304015		0.34375	1.23292	0.847384	0.0130814
15 min 1	0.17875	10.1613	0.982713			0.165	1.41167	0.895349
15 min 2	0.12375	10.2163	0.988032			0.15125	1.42542	0.90407
15 min 3	0.4125	9.9275	0.960106			0.26125	1.31542	0.834302
15 min av	0.238333	10.1017	0.97695	0.0121068		0.1925	1.38417	0.877907	0.031038
30 min 1	1.19625	9.14375	0.884309			0.6325	0.944167
30 min 2	0.28875	10.0513	0.972074			0.23375	1.34292	0.851744
30 min 3	0.4675	9.8725	0.954787			0.3025	1.27417	0.80814
30 min av	0.650833	9.68917	0.937057	0.0379605		0.42625	1.18708	0.829942	0.0218023
1 hr 1	0.72875	9.61125	0.929521			0.320833	1.25583		0.729651
1 hr 2	0.06875	10.2713	0.993351			0.12375	1.45292	0.921512
1 hr 3	0.0825	10.2575	0.992021			0.12375	1.45292	0.921512
1 hr av	0.293333	10.0467	0.971631	0.0297812		0.189444	1.38722	0.921512	0
24 hr 1	0.06875	10.2713	0.993351			0.1375	1.43917	0.912791
24 hr 2	0.0275	10.3125	0.99734			0.09625	1.48042	0.938953
24 hr3	0.04125	10.2988	0.996011			0.11	1.46667	0.930233
24 hr av	0.0458333	10.2942	0.995567	0.00165854		0.114583	1.46208	0.927326	0.0108769
no bc 1	11.0137					1.52625
no bc 2	11.0688					1.44375
no bc 3	8.9375					1.76
no bc av	10.34					1.57667

## Sheet: pH values
	Lower boat level	Trib 1			Lower Boat Level		Trib 1
	pH	pH			pH change	St Dev	pH change	St Dev
no bc	7.31667	7.6		no bc
1 min 1	8.12	8.7		1 min 1	0.803333		1.1
1 min 2	8.24	9		1 min 2	0.923333		1.4
1 min 3	8.15	8.9		1 min 3	0.833333		1.3
1 min	8.17	8.86667		1 min	0.853333	0.0509902	1.26667	0.124722
5 min 1	8.67	9.1		5 min 1	1.35333		1.5
5 min 2	8.57	9.1		5 min 2	1.25333		1.5
5 min 3	8.58	9.1		5 min 3	1.26333		1.5
5 min	8.60667	9.1		5 min	1.29	0.0449691	1.5	0
15 min 1	8.85	9.2		15 min 1	1.53333		1.6
15 min 2	8.95	9.2		15 min 2	1.63333		1.6
15 min 3	8.97	9.3		15 min 3	1.65333		1.7
15 min	8.92333	9.23333		15 min	1.60667	0.0524934	1.63333	0.0471405
30 min 1	9.1	9.4		30 min 1	1.78333		1.8
30 min 2	9.11	9.5		30 min 2	1.79333		1.9
30 min 3	9.15	9.5		30 min 3	1.83333		1.9
30 min	9.12	9.46667		30 min	1.80333	0.0216025	1.86667	0.0471405
1 hr 1	9.16	9.5		1 hr 1	1.84333		1.9
1 hr 2	9.25	9.3		1 hr 2	1.93333		1.7
1 hr 3	9.17	9.5		1 hr 3	1.85333		1.9
1 hr	9.19333	9.43333		1 hr	1.87667	0.0402768	1.83333	0.0942809
24 hr 1	9.59	9.5		24 hr 1	2.27333		1.9
24 hr 2	9.68	9.5		24 hr 2	2.36333		1.9
24 hr3	9.77	9.6		24 hr3	2.45333		2
24 hr	9.68	9.53333		24 hr	2.36333	0.0734847	1.93333	0.0471405
no bc 1	7.26	7.6		no bc 1
no bc 2	7.33	7.7		no bc 2
no bc 3	7.36	7.5		no bc 3
no bc	7.31667	7.6		no bc
No mine water 1	10.71	10		No mine water 1	3.39333		2.4
No mine water 2	10.95	9.9		No mine water 2	3.63333		2.3
No mine water 3	10.84	9.9		No mine water 3	3.52333		2.3
No mine water	10.8333	9.93333		No mine water	3.51667	0.0980929	2.33333	0.0471405

## Sheet: PHREEQC inputs (contact time)
mine water		units		pre WAS	1 min	5 min	15 min	30 min	1 hr	24 hr
	temp	°C		15.2	15.2	15.2	15.2	15.2	15.2	15.2
	pH			6.5	8.9	9.1	9.2	9.5	9.4	9.5
	pe			7.4	7.4	7.4	7.4	7.4	7.4	7.4
	Al	ppb		72.7	72.7	72.7	72.7	72.7	72.7	72.7
	Alkalinity			26	155	160	170	190	190	190
	Ca	ppm		2.9	6.15	5.58	7.37	16	11.3	5.5
	Cd	ppb		42.9	42.9	42.9	42.9	42.9	42.9	42.9
	Cu	ppb		16.4	16.4	16.4	16.4	16.4	16.4	16.4
	K	ppm		0.92	35.6	27.9	36.2	38.3	42.8	39
	Mg	ppm		2.54	5.4	6.01	5.4	7	6.6	5.78
	N(3)	ppm			0.04	0.04	0.04	0.04	0.04	0.04
	N(5)	ppm			0.26	0.26	0.26	0.26	0.26	0.26
	P	ppm			0.34	0.34	0.34	0.34	0.34	0.34
	Na	ppm		2.95	32.9	29.74	37.1	38	38.3	37.6
	Pb	ppm		1.7	1.7	1.7	1.7	1.7	1.7	1.7
	P	ppm			0.34	0.34	0.34	0.34	0.34	0.34
	Zn	ppm		12.1	12.1	12.1	12.1	12.1	12.1	12.1
	S(6)	ppm		11	26.45	26.45	26.45	26.45	26.45	26.45

## Sheet: PHREEQC outputs (contact time)
mine water					1 min					5 min					15 min					30 min					1 hr					24 hr
Pb		8.206e-06	% species		Pb		8.207e-06	% species		Pb		8.207e-06	% species		Pb		8.207e-06	% species		Pb		8.208e-06	% species		Pb		8.208e-06	% species		Pb		8.208e-06	% species
	Pb+2	3.622e-06	0.441384			PbCO3	6.659e-06	0.811381			PbCO3	6.079e-06	0.740709			PbCO3	5.648e-06	0.688193			PbCO3	4.409e-06	0.537159			PbCO3	4.732e-06	0.576511			PbCO3	4.351e-06	0.530093
	PbCO3	3.013e-06	0.36717			Pb(CO3)2-2	1.401e-06	0.170708			Pb(CO3)2-2	1.982e-06	0.241501			Pb(CO3)2-2	2.419e-06	0.294748			Pb(CO3)2-2	3.644e-06	0.443957			Pb(CO3)2-2	3.338e-06	0.406676			Pb(CO3)2-2	3.711e-06	0.45212
	PbHCO3+	1.209e-06	0.147331			PbOH+	9.912e-08	0.0120775			PbOH+	9.223e-08	0.011238			PbOH+	8.349e-08	0.010173			Pb(OH)2	7.884e-08	0.00960526			PbOH+	6.876e-08	0.00837719			Pb(OH)2	7.453e-08	0.00908017
	PbOH+	1.987e-07	0.024214			Pb(OH)2	2.862e-08	0.00348727			Pb(OH)2	4.224e-08	0.00514683			Pb(OH)2	4.798e-08	0.00584623			PbOH+	6.912e-08	0.00842105			Pb(OH)2	6.235e-08	0.00759625			PbOH+	6.515e-08	0.00793738
	PbSO4	1.626e-07	0.0198148			PbHCO3+	1.094e-08	0.00133301			PbHCO3+	6.297e-09	0.000767272			PbHCO3+	4.663e-09	0.000568174			Pb(OH)3-	3.087e-09	0.000376096			PbHCO3+	2.476e-09	0.000301657			Pb(OH)3-	2.909e-09	0.00035441
	Pb(CO3)2-2	4.952e-10	6.03461e-05			Pb+2	7.821e-09	0.000952967			Pb+2	4.583e-09	0.000558426			Pb+2	3.327e-09	0.000405386			PbHCO3+	1.834e-09	0.000223441			Pb(OH)3-	1.938e-09	0.000236111			PbHCO3+	1.804e-09	0.000219786
	Pb(OH)2	2.35e-10	2.86376e-05			PbSO4	6.814e-10	8.30267e-05			Pb(OH)3-	6.528e-10	7.95419e-05			Pb(OH)3-	9.366e-10	0.000114122			Pb+2	1.401e-09	0.000170687			Pb+2	1.751e-09	0.000213328			Pb+2	1.31e-09	0.0001596
	Pb(SO4)2-2	9.306e-11	1.13405e-05			Pb(OH)3-	2.793e-10	3.40319e-05			PbSO4	4.018e-10	4.89582e-05			PbSO4	2.838e-10	3.45802e-05			PbSO4	1.131e-10	1.37792e-05			PbSO4	1.433e-10	1.74586e-05			PbSO4	1.104e-10	1.34503e-05
	Pb2OH+3	1.882e-11	2.29344e-06			PbNO3+	1.642e-12	2.00073e-07			Pb(OH)4-2	2.296e-12	2.79761e-07			Pb(OH)4-2	4.187e-12	5.10174e-07			Pb(OH)4-2	2.795e-11	3.40521e-06			Pb(OH)4-2	1.39e-11	1.69347e-06			Pb(OH)4-2	2.612e-11	3.18226e-06
	Pb(OH)3-	8.874e-15	1.0814e-09			Pb(SO4)2-2	9.471e-13	1.15401e-07			PbNO3+	9.646e-13	1.17534e-07			PbNO3+	6.912e-13	8.42208e-08			PbNO3+	2.853e-13	3.47588e-08			PbNO3+	3.576e-13	4.35673e-08			PbNO3+	2.697e-13	3.28582e-08
	Pb3(OH)4+2	1.003e-15	1.22228e-10			Pb(OH)4-2	6.21e-13	7.56671e-08			Pb(SO4)2-2	5.591e-13	6.81248e-08			Pb(SO4)2-2	3.945e-13	4.80687e-08			Pb(SO4)2-2	1.549e-13	1.88718e-08			Pb(SO4)2-2	1.975e-13	2.40619e-08			Pb(SO4)2-2	1.544e-13	1.88109e-08
	Pb(OH)4-2	7.225e-20	8.80453e-15			Pb3(OH)4+2	3.216e-14	3.91861e-09			Pb3(OH)4+2	4.104e-14	5.00061e-09			Pb3(OH)4+2	3.845e-14	4.68502e-09			Pb3(OH)4+2	4.374e-14	5.32895e-09			Pb3(OH)4+2	3.418e-14	4.16423e-09			Pb3(OH)4+2	3.652e-14	4.44932e-09
						Pb2OH+3	2.267e-14	2.76228e-09			Pb2OH+3	1.233e-14	1.50238e-09			Pb2OH+3	8.209e-15	1.00024e-09			Pb2OH+3	2.919e-15	3.55629e-10			Pb2OH+3	3.617e-15	4.40668e-10			Pb2OH+3	2.543e-15	3.0982e-10
Zn		0.0001851
	Zn+2	0.0001712	0.924905		Zn		0.0001852			Zn		0.0001852			Zn		0.0001852			Zn		0.0001852	% species		Zn		0.0001852			Zn		0.0001852
	ZnHCO3+	9.068e-06	0.0489897			Zn(CO3)2-2	9.273e-05	0.500702			Zn(CO3)2-2	0.0001049	0.566415			Zn(CO3)2-2	0.0001129	0.609611			Zn(CO3)2-2	0.0001215	0.656048			Zn(CO3)2-2	0.0001235	0.666847			Zn(CO3)2-2	0.0001241	0.670086
	ZnSO4	2.968e-06	0.0160346			ZnCO3	5.179e-05	0.279644			ZnCO3	3.795e-05	0.204914			Zn(OH)2	3.803e-05	0.205346			Zn(OH)2	4.466e-05	0.241145			Zn(OH)2	3.919e-05	0.211609			Zn(OH)2	4.234e-05	0.228618
	ZnCO3	1.638e-06	0.00884927			Zn(OH)2	3.218e-05	0.173758			Zn(OH)2	3.778e-05	0.203996			ZnCO3	3.097e-05	0.167225			ZnCO3	1.728e-05	0.0933045			ZnCO3	2.058e-05	0.111123			ZnCO3	1.71e-05	0.0923326
	ZnOH+	2.452e-07	0.00132469			Zn+2	5.274e-06	0.0284773			Zn+2	2.47e-06	0.0133369			Zn+2	1.582e-06	0.00854212			ZnOH+	6.15e-07	0.00332073			ZnOH+	6.79e-07	0.00366631			ZnOH+	5.814e-07	0.00313931
	Zn(OH)2	1.846e-08	9.97299e-05			ZnOH+	1.751e-06	0.00945464			ZnOH+	1.302e-06	0.00703024			ZnOH+	1.04e-06	0.00561555			Zn(OH)3-	4.815e-07	0.00259989			Zn+2	6.596e-07	0.00356156			Zn(OH)3-	4.552e-07	0.00245788
	Zn(SO4)2-2	2.844e-09	1.53647e-05			ZnHCO3+	1.174e-06	0.00633909			ZnHCO3+	5.402e-07	0.00291685			ZnHCO3+	3.53e-07	0.00190605			Zn+2	4.757e-07	0.00256857			Zn(OH)3-	3.354e-07	0.00181102			Zn+2	4.461e-07	0.00240875
	Zn(CO3)2-2	2.291e-09	1.23771e-05			ZnSO4	1.78e-07	0.000961123			Zn(OH)3-	1.615e-07	0.00087203			Zn(OH)3-	2.045e-07	0.00110421			ZnHCO3+	9.919e-08	0.000535583			ZnHCO3+	1.486e-07	0.000802376			ZnHCO3+	9.788e-08	0.00052851
	Zn(OH)3-	1.92e-13	1.03728e-09			Zn(OH)3-	8.648e-08	0.000466955			ZnSO4	8.386e-08	0.000452808			ZnSO4	5.228e-08	0.000282289			ZnSO4	1.489e-08	8.03996e-05			ZnSO4	2.092e-08	0.000112959			ZnSO4	1.458e-08	7.87257e-05
	Zn(OH)4-2	1.082e-19	5.84549e-16			Zn(SO4)2-2	4.142e-10	2.2365e-06			Zn(SO4)2-2	1.954e-10	1.05508e-06			Zn(SO4)2-2	1.217e-10	6.57127e-07			Zn(OH)4-2	3.016e-10	1.62851e-06			Zn(OH)4-2	1.665e-10	8.99028e-07			Zn(OH)4-2	2.827e-10	1.52646e-06
						Zn(OH)4-2	1.33e-11	7.18143e-08			Zn(OH)4-2	3.931e-11	2.12257e-07			Zn(OH)4-2	6.325e-11	3.41523e-07			Zn(SO4)2-2	3.413e-11	1.84287e-07			Zn(SO4)2-2	4.83e-11	2.60799e-07			Zn(SO4)2-2	3.411e-11	1.84179e-07

## Sheet: Zn and Pb mobile (filter)
Solution Label	Pb	Zn	% Pb mobile	% Zn mobile
Trib 1 a	0.4	10.93
Trib 1 b	0.5	11.19
Trib 1 c	0.5	12.02
Trib 1 Av	0.466667	11.38	0.352201	0.946837
Acid trib 1 a	1.095	10.29
Acid trib 1 b	1.44	11.025
Acid trib 1 c	1.44	11.01
Acid Trib 1 av	1.325	10.775

## Sheet: XPS data export
Name			Name		Mg 1s				Name		Na 1s	Zn 2p ZnCO3	Zn 2p Zin-C-Hydrates	Zn 2p ZnCO3				Name			Name		O 1s ME Carbon	O 1s	O 1s Organic C-O	O 1s MeOx				Name			Name		Ca 2p CaO	Ca 2p CaF2	Ca 2p CaO Spin	Ca 2p CaF2 spin				Name		C 1s C-C	C 1s C-O-C	C 1s O-C=O	C 1s ZnCO3	C 1s C2HF3	K 2p KCl
Position			Position		1305.77				Position		1073.78	1024.34	1026.61	1047.34				Position			Position		532.35	532.77	533.2	534.9				Position			Position		350.2	348.88	353.7	352.38				Position		284.41	286.02	288.9	289.9	291.11	292.31
FWHM			FWHM		2.5				FWHM		2.57	2	2	2				FWHM			FWHM		1.95	1.95	1.95	1.95				FWHM			FWHM		1.6	1.6	1.6	1.6				FWHM		1.41	1.41	1.41	1.41	1.41	1.91
Area			Area		1251.09				Area		392.3	178.15	77.67	133.5				Area			Area		0	4554.13	6790.69	3194.4				Area			Area		837.77	4091.76	515.15	2097.79				Area		616.7	2578.07	182.15	268.11	258.17	160.39
Lineshape			Lineshape		LA(1.53,243)				Lineshape		LA(1.3,230)	LA(1.3,230)	LA(1.3,230)	LA(1.3,230)				Lineshape			Lineshape		LA(1.53,243)	LA(1.53,243)	LA(1.53,243)	LA(1.53,243)				Lineshape			Lineshape		GL(30)	GL(30)	GL(30)	GL(30)				Lineshape		GL(30)	GL(30)	GL(30)	LA(1.53,243)	LA(1.53,243)	LA(1.53,243)
B.E.	Cycle 0:24hrMW:wide:CPS		B.E.	Cycle 0:24hrMW:Mg 1s:CPS	Mg 1s:Mg 1s	Background	Envelope		B.E.	Cycle 0:24hrMW:Zn 2p + Na 1s:CPS	Zn 2p + Na 1s:Na 1s	Zn 2p + Na 1s:Zn 2p ZnCO3	Zn 2p + Na 1s:Zn 2p Zin-C-Hydrates	Zn 2p + Na 1s:Zn 2p ZnCO3	Background	Envelope		B.E.	Cycle 0:24hrMW:Co 2p:CPS		B.E.	Cycle 0:24hrMW:O 1s:CPS	O 1s:O 1s ME Carbon	O 1s:O 1s	O 1s:O 1s Organic C-O	O 1s:O 1s MeOx	Background	Envelope		B.E.	Cycle 0:24hrMW:N 1s:CPS		B.E.	Cycle 0:24hrMW:Ca 2p:CPS	Ca 2p:Ca 2p CaO	Ca 2p:Ca 2p CaF2	Ca 2p:Ca 2p CaO Spin	Ca 2p:Ca 2p CaF2 spin	Background	Envelope		B.E.	Cycle 0:24hrMW:C 1s:CPS	C 1s:C 1s C-C	C 1s:C 1s C-O-C	C 1s:C 1s O-C=O	C 1s:C 1s ZnCO3	C 1s:C 1s C2HF3	C 1s:K 2p KCl
1204.08	45596.8		1314.08	2496	2496.39	2496	2496.39		1094.08	1572.5	1572.53	1572.5	1572.5	1572.5	1572.5	1572.54		814.084	1262		547.084	1314	1314	1314.16	1314.26	1314.18	1314	1314.59		414.084	898		359.084	829.333	829.333	829.333	829.333	829.333	829.333	829.333		304.084	469	469	469	469	469.005	469.006	469.01
1203.08	46481.2		1313.98	2464.67	2465.08	2464.67	2465.08		1093.98	1570.38	1570.41	1570.38	1570.38	1570.38	1570.38	1570.41		813.984	1236		546.984	1296	1296	1296.16	1296.26	1296.19	1296	1296.61		413.984	904		358.984	814.667	814.667	814.667	814.667	814.667	814.667	814.667		303.984	460.667	460.667	460.667	460.667	460.671	460.673	460.676
1202.08	47647		1313.88	2520	2520.43	2520	2520.43		1093.88	1552.62	1552.66	1552.62	1552.62	1552.63	1552.62	1552.66		813.884	1244		546.884	1282	1282	1282.16	1282.27	1282.19	1282	1282.62		413.884	893.333		358.884	762.667	762.667	762.667	762.667	762.667	762.667	762.667		303.884	455.333	455.333	455.333	455.333	455.338	455.34	455.343
1201.08	46963.6		1313.78	2547.33	2547.78	2547.33	2547.78		1093.78	1554.62	1554.66	1554.62	1554.62	1554.63	1554.62	1554.66		813.784	1273.33		546.784	1314.5	1314.5	1314.67	1314.77	1314.69	1314.5	1315.14		413.784	860		358.784	778	778	778	778	778	778	778		303.784	459	459	459	459	459.005	459.007	459.01
1200.08	48481.2		1313.68	2548	2548.46	2548	2548.46		1093.68	1574.25	1574.29	1574.25	1574.25	1574.25	1574.25	1574.29		813.684	1248		546.684	1298	1298	1298.17	1298.28	1298.2	1298	1298.65		413.684	855.333		358.684	777.333	777.333	777.333	777.333	777.333	777.333	777.333		303.684	452.333	452.333	452.333	452.333	452.339	452.34	452.344
1199.08	47677.2		1313.58	2534	2534.48	2534	2534.48		1093.58	1584.38	1584.41	1584.38	1584.38	1584.38	1584.38	1584.41		813.584	1253.33		546.584	1271.5	1271.5	1271.67	1271.79	1271.7	1271.5	1272.17		413.584	848.667		358.584	804.667	804.667	804.667	804.667	804.667	804.667	804.667		303.584	454	454	454	454	454.005	454.007	454.011
1198.08	46551.6		1313.48	2495.33	2495.83	2495.33	2495.83		1093.48	1572.75	1572.79	1572.75	1572.75	1572.75	1572.75	1572.79		813.484	1266		546.484	1263.5	1263.5	1263.68	1263.79	1263.71	1263.5	1264.18		413.484	886.667		358.484	773.333	773.333	773.333	773.333	773.333	773.333	773.333		303.484	472	472	472	472	472.005	472.007	472.011
1197.08	48853		1313.38	2549.33	2549.86	2549.33	2549.86		1093.38	1572.75	1572.79	1572.75	1572.75	1572.75	1572.75	1572.79		813.384	1246		546.384	1319.5	1319.5	1319.68	1319.8	1319.72	1319.5	1320.2		413.384	876.667		358.384	774.667	774.667	774.667	774.667	774.667	774.667	774.667		303.384	459.667	459.667	459.667	459.667	459.672	459.674	459.678
1196.08	47164.6		1313.28	2511.33	2511.88	2511.33	2511.88		1093.28	1549.62	1549.66	1549.62	1549.62	1549.63	1549.62	1549.66		813.284	1212		546.284	1292.5	1292.5	1292.69	1292.81	1292.72	1292.5	1293.22		413.284	838		358.284	836	793.644	793.644	793.644	793.644	793.644	793.644		303.284	448	448	448	448	448.006	448.007	448.012
1195.08	44853.1		1313.18	2539.33	2539.9	2539.33	2539.9		1093.18	1571.75	1571.79	1571.75	1571.75	1571.75	1571.75	1571.79		813.184	1230.67		546.184	1282	1282	1282.19	1282.32	1282.23	1282	1282.74		413.184	869.333		358.184	802	793.622	793.622	793.622	793.622	793.622	793.622		303.184	448.667	448.667	448.667	448.667	448.673	448.674	448.679
1194.08	44611.9		1313.08	2544.67	2545.26	2544.67	2545.26		1093.08	1575.12	1575.16	1575.12	1575.12	1575.13	1575.12	1575.16		813.084	1254.67		546.084	1269	1269	1269.2	1269.32	1269.24	1269	1269.76		413.084	848.667		358.084	786	793.601	793.601	793.601	793.601	793.601	793.601		303.084	460	460	460	460	460.006	460.008	460.013
1193.08	43807.9		1312.98	2571.33	2571.96	2571.33	2571.96		1092.98	1563.75	1563.79	1563.75	1563.75	1563.75	1563.75	1563.79		812.984	1252		545.984	1277.5	1277.5	1277.7	1277.83	1277.74	1277.5	1278.27		412.984	878		357.984	790.667	793.593	793.593	793.593	793.593	793.593	793.593		302.984	456.333	456.333	456.333	456.333	456.339	456.341	456.346
1192.08	42873.3		1312.88	2485.33	2485.98	2485.33	2485.98		1092.88	1569.5	1569.54	1569.5	1569.5	1569.5	1569.5	1569.54		812.884	1219.33		545.884	1258	1258	1258.21	1258.34	1258.25	1258	1258.79		412.884	872		357.884	793.333	793.593	793.593	793.593	793.593	793.593	793.593		302.884	449.667	449.667	449.667	449.667	449.673	449.675	449.68
1191.08	41727.6		1312.78	2531.33	2532.01	2531.33	2532.01		1092.78	1558.62	1558.66	1558.62	1558.62	1558.63	1558.62	1558.67		812.784	1236		545.784	1214	1214	1214.21	1214.35	1214.26	1214	1214.81		412.784	869.333		357.784	815.333	793.534	793.534	793.535	793.534	793.534	793.535		302.784	445.333	445.333	445.333	445.333	445.34	445.342	445.347
1190.08	40250.2		1312.68	2568.67	2569.38	2568.67	2569.38		1092.68	1564.62	1564.67	1564.62	1564.62	1564.63	1564.62	1564.67		812.684	1291.33		545.684	1228.5	1228.5	1228.71	1228.86	1228.76	1228.5	1229.33		412.684	826		357.684	790.667	793.527	793.527	793.527	793.527	793.527	793.527		302.684	425	425	425	425	425.007	425.009	425.014
1189.08	39918.6		1312.58	2549.33	2550.08	2549.33	2550.08		1092.58	1591.25	1591.29	1591.25	1591.25	1591.25	1591.25	1591.29		812.584	1284		545.584	1270	1270	1270.22	1270.37	1270.27	1270	1270.86		412.584	887.333		357.584	795.333	793.522	793.522	793.523	793.522	793.522	793.523		302.584	428.667	428.667	428.667	428.667	428.673	428.675	428.681
1188.08	40441.2		1312.48	2530	2530.79	2530	2530.79		1092.48	1537	1537.04	1537	1537	1537	1537	1537.04		812.484	1262		545.484	1289	1289	1289.22	1289.38	1289.28	1289	1289.88		412.484	858		357.484	807.333	793.485	793.485	793.487	793.485	793.485	793.487		302.484	404.333	404.333	404.333	404.333	404.34	404.342	404.349
1187.08	40099.5		1312.38	2524.67	2525.49	2524.67	2525.49		1092.38	1572.38	1572.42	1572.38	1572.38	1572.38	1572.38	1572.42		812.384	1290		545.384	1255.5	1255.5	1255.73	1255.88	1255.79	1255.5	1256.41		412.384	892.667		357.384	804	793.456	793.456	793.46	793.456	793.456	793.46		302.384	421.333	421.333	421.333	421.333	421.34	421.343	421.349
1186.08	39948.8		1312.28	2509.33	2510.2	2509.33	2510.2		1092.28	1591.62	1591.67	1591.62	1591.62	1591.63	1591.62	1591.67		812.284	1254.67		545.284	1247	1247	1247.24	1247.39	1247.3	1247	1247.93		412.284	892.667		357.284	825.333	793.371	793.371	793.377	793.371	793.371	793.377		302.284	426.667	426.667	426.667	426.667	426.674	426.676	426.683
1185.08	39607.1		1312.18	2538.67	2539.58	2538.67	2539.58		1092.18	1573.75	1573.79	1573.75	1573.75	1573.75	1573.75	1573.8		812.184	1223.33		545.184	1254.5	1254.5	1254.74	1254.9	1254.81	1254.5	1255.46		412.184	864		357.184	856	793.202	793.202	793.213	793.202	793.202	793.213		302.184	430.333	430.333	430.333	430.333	430.341	430.343	430.35
1184.08	39426.2		1312.08	2536.67	2537.63	2536.67	2537.63		1092.08	1565.12	1565.17	1565.12	1565.12	1565.13	1565.12	1565.17		812.084	1264.67		545.084	1231.5	1231.5	1231.75	1231.91	1231.82	1231.5	1232.48		412.084	872.667		357.084	780	793.167	793.167	793.184	793.167	793.167	793.184		302.084	409	409	409	409	409.008	409.01	409.017
1183.08	39556.8		1311.98	2515.33	2516.35	2515.33	2516.35		1091.98	1582	1582.05	1582	1582	1582	1582	1582.05		811.984	1244.67		544.984	1214	1214	1214.26	1214.42	1214.33	1214	1215.01		411.984	868		356.984	778	793.127	793.127	793.155	793.127	793.127	793.155		301.984	424	424	424	424	424.008	424.01	424.018
1182.08	39767.8		1311.88	2535.33	2536.41	2535.33	2536.41		1091.88	1583.5	1583.55	1583.5	1583.5	1583.5	1583.5	1583.55		811.884	1267.33		544.884	1181	1181	1181.26	1181.43	1181.34	1181	1182.04		411.884	880.667		356.884	785.333	793.106	793.106	793.153	793.106	793.106	793.153		301.884	438.333	438.333	438.333	438.333	438.341	438.344	438.351
1181.08	40401		1311.78	2528	2536.17	2535.03	2536.17		1091.78	1571.5	1571.55	1571.5	1571.5	1571.5	1571.5	1571.55		811.784	1262.67		544.784	1202.5	1202.5	1202.77	1202.95	1202.85	1202.5	1203.56		411.784	864.667		356.784	797.333	793.094	793.094	793.172	793.095	793.094	793.172		301.784	435.667	435.667	435.667	435.667	435.675	435.678	435.685
1180.08	39426.2		1311.68	2492	2535.89	2534.69	2535.89		1091.68	1565.38	1565.42	1565.38	1565.38	1565.38	1565.38	1565.42		811.684	1238.67		544.684	1231.5	1231.5	1231.78	1231.96	1231.86	1231.5	1232.59		411.684	868		356.684	814.667	793.036	793.036	793.161	793.037	793.036	793.161		301.684	397	397	397	397	397.009	397.011	397.02
1179.08	39818.1		1311.58	2556.67	2535.78	2534.51	2535.78		1091.58	1587.25	1587.3	1587.25	1587.25	1587.25	1587.25	1587.3		811.584	1211.33		544.584	1229.5	1229.5	1229.78	1229.98	1229.87	1229.5	1230.63		411.584	867.333		356.584	791.333	793.032	793.032	793.229	793.033	793.032	793.23		301.584	407	407	407	407	407.009	407.012	407.02
1178.08	41365.8		1311.48	2522.67	2535.77	2534.42	2535.77		1091.48	1586.12	1586.17	1586.12	1586.12	1586.13	1586.12	1586.17		811.484	1264.67		544.484	1214	1214	1214.29	1214.49	1214.38	1214	1215.16		411.484	836		356.484	802	793.008	793.008	793.317	793.009	793.008	793.318		301.484	411	411	411	411	411.009	411.012	411.021
1177.08	41004		1311.38	2564	2535.61	2534.18	2535.61		1091.38	1554.75	1554.8	1554.75	1554.75	1554.75	1554.75	1554.8		811.384	1248		544.384	1210	1210	1210.3	1210.5	1210.4	1210	1211.2		411.384	839.333		356.384	777.333	792.966	792.966	793.445	792.968	792.966	793.447		301.384	404.667	404.667	404.667	404.667	404.676	404.679	404.688
1176.08	40883.4		1311.28	2587.33	2535.27	2533.75	2535.27		1091.28	1566.38	1566.42	1566.38	1566.38	1566.38	1566.38	1566.43		811.284	1260.67		544.284	1181.5	1181.5	1181.81	1182.02	1181.91	1181.5	1182.74		411.284	878.667		356.284	779.333	792.929	792.929	793.66	792.933	792.929	793.664		301.284	404.667	404.667	404.667	404.667	404.676	404.68	404.689
1175.08	41004		1311.18	2599.33	2534.84	2533.22	2534.84		1091.18	1580.38	1580.42	1580.38	1580.38	1580.38	1580.38	1580.43		811.184	1262		544.184	1184.5	1184.5	1184.82	1185.03	1184.93	1184.5	1185.77		411.184	889.333		356.184	792.667	792.929	792.929	794.033	792.936	792.929	794.04		301.184	404.667	404.667	404.667	404.667	404.676	404.68	404.69
1174.08	41968.8		1311.08	2514.67	2534.8	2533.07	2534.8		1091.08	1567.25	1567.3	1567.25	1567.25	1567.25	1567.25	1567.3		811.084	1246		544.084	1179.5	1179.5	1179.83	1180.05	1179.94	1179.5	1180.81		411.084	910		356.084	798.667	792.913	792.913	794.554	792.926	792.913	794.567		301.084	404	404	404	404	404.01	404.014	404.024
1173.08	39707.6		1310.98	2572.67	2534.59	2532.75	2534.59		1090.98	1576.38	1576.43	1576.38	1576.38	1576.38	1576.38	1576.43		810.984	1213.33		543.984	1223	1223	1223.34	1223.56	1223.45	1223	1224.35		410.984	883.333		355.984	775.333	792.866	792.866	795.28	792.888	792.866	795.302		300.984	405.667	403.994	403.994	403.994	404.005	404.008	404.019
1172.08	40270.3		1310.88	2616	2534.05	2532.07	2534.05		1090.88	1567	1567.05	1567	1567	1567	1567	1567.06		810.884	1236.67		543.884	1173.5	1173.5	1173.85	1174.08	1173.97	1173.5	1174.89		410.884	828.667		355.884	803.333	792.838	792.838	796.342	792.875	792.838	796.379		300.884	406.333	403.986	403.986	403.986	403.997	404.001	404.012
1171.08	40843.2		1310.78	2573.33	2533.86	2531.74	2533.86		1090.78	1608	1608.05	1608	1608	1608	1608	1608.06		810.784	1220.67		543.784	1214	1214	1214.35	1214.6	1214.48	1214	1215.43		410.784	866.667		355.784	849.333	792.686	792.686	797.696	792.75	792.686	797.76		300.784	400	403.973	403.973	403.973	403.983	403.988	404
1170.08	39898.5		1310.68	2578	2533.64	2531.36	2533.64		1090.68	1579.25	1579.3	1579.25	1579.25	1579.25	1579.25	1579.31		810.684	1288.67		543.684	1180	1180	1180.36	1180.62	1180.5	1180	1181.47		410.684	892.667		355.684	820.667	792.611	792.611	799.707	792.717	792.611	799.813		300.684	406.333	403.965	403.965	403.965	403.976	403.98	403.993
1169.08	41094.4		1310.58	2554.67	2533.62	2531.18	2533.62		1090.58	1571.5	1571.56	1571.5	1571.5	1571.5	1571.5	1571.56		810.584	1234.67		543.584	1192	1192	1192.37	1192.63	1192.52	1192	1193.53		410.584	876		355.584	827.333	792.518	792.518	802.408	792.694	792.518	802.584		300.584	395.667	403.936	403.936	403.936	403.948	403.952	403.966
1168.08	40169.8		1310.48	2554	2533.63	2530.99	2533.63		1090.48	1562.88	1562.93	1562.88	1562.88	1562.88	1562.88	1562.93		810.484	1264		543.484	1185	1185	1185.38	1185.65	1185.54	1185	1186.58		410.484	846		355.484	814	792.46	792.46	806.086	792.748	792.46	806.374		300.484	414	403.902	403.902	403.902	403.914	403.918	403.932
1167.08	40109.5		1310.38	2604	2533.26	2530.4	2533.26		1090.38	1569.5	1569.56	1569.5	1569.5	1569.5	1569.5	1569.56		810.384	1256.67		543.384	1151.5	1151.5	1151.9	1152.17	1152.07	1151.5	1153.14		410.384	856.667		355.384	860.667	792.277	792.277	810.795	792.739	792.277	811.258		300.384	401.667	403.894	403.894	403.894	403.906	403.911	403.926
1166.08	40531.6		1310.28	2591.33	2533	2529.91	2533		1090.28	1580.25	1580.31	1580.25	1580.25	1580.25	1580.25	1580.31		810.284	1270.67		543.284	1125	1125	1125.41	1125.69	1125.59	1125	1126.69		410.284	876		355.284	874.667	792.055	792.055	816.85	792.794	792.055	817.588		300.284	400.333	403.882	403.882	403.882	403.895	403.9	403.915
1165.08	40119.6		1310.18	2567.33	2532.97	2529.6	2532.97		1090.18	1571.75	1571.81	1571.75	1571.75	1571.75	1571.75	1571.81		810.184	1196.67		543.184	1133.5	1133.5	1133.92	1134.21	1134.11	1133.5	1135.25		410.184	874.667		355.184	892	791.787	791.787	824.606	792.946	791.787	825.765		300.184	411.667	403.856	403.856	403.856	403.868	403.874	403.89
1164.08	40049.2		1310.08	2556.67	2533.06	2529.38	2533.06		1090.08	1559.75	1559.81	1559.75	1559.75	1559.75	1559.75	1559.81		810.084	1242.67		543.084	1152.5	1152.5	1152.94	1153.23	1153.13	1152.5	1154.31		410.084	867.333		355.084	889.333	791.525	791.525	834.287	793.323	791.525	836.085		300.084	417	403.81	403.81	403.81	403.824	403.829	403.846
1163.08	39597		1309.98	2540	2533.32	2529.3	2533.32		1089.98	1576.12	1576.19	1576.12	1576.12	1576.13	1576.12	1576.19		809.984	1258		542.984	1142.5	1142.5	1142.95	1143.26	1143.16	1142.5	1144.36		409.984	858		354.984	894	791.249	791.249	846.21	794.005	791.249	848.966		299.984	411.333	403.785	403.785	403.785	403.798	403.804	403.821
1162.08	39657.3		1309.88	2526.67	2533.69	2529.28	2533.69		1089.88	1584.62	1584.69	1584.62	1584.62	1584.63	1584.62	1584.69		809.884	1237.33		542.884	1082	1082	1082.46	1082.78	1082.68	1082	1083.92		409.884	860.667		354.884	890.667	790.982	790.982	860.584	795.137	790.982	864.739		299.884	410.333	403.762	403.762	403.762	403.776	403.783	403.8
1161.08	39898.5		1309.78	2504.67	2533.95	2529.08	2533.95		1089.78	1572.5	1572.56	1572.5	1572.5	1572.5	1572.5	1572.57		809.784	1287.33		542.784	1066.5	1066.5	1066.98	1067.31	1067.2	1066.5	1068.49		409.784	872.667		354.784	920.667	790.634	790.634	877.375	796.852	790.634	883.594		299.784	408.667	403.746	403.746	403.746	403.76	403.767	403.786
1160.08	39918.6		1309.68	2524	2534.43	2529.04	2534.43		1089.68	1561.88	1561.94	1561.88	1561.88	1561.88	1561.88	1561.94		809.684	1250.67		542.684	1108.5	1108.5	1108.99	1109.34	1109.23	1108.5	1110.56		409.684	876.667		354.684	972.667	790.144	790.144	896.67	799.296	790.144	905.821		299.684	398	403.726	403.726	403.726	403.741	403.748	403.768
1159.08	39255.3		1309.58	2540	2534.95	2528.95	2534.95		1089.58	1568.5	1568.57	1568.5	1568.5	1568.5	1568.5	1568.57		809.584	1252		542.584	1091.5	1091.5	1092	1092.37	1092.27	1091.5	1093.64		409.584	890.667		354.584	948.667	789.719	789.718	918.318	803.033	789.718	931.633		299.584	412	403.698	403.698	403.698	403.713	403.72	403.742
1158.08	39516.6		1309.48	2528	2535.65	2528.94	2535.65		1089.48	1593.38	1593.44	1593.38	1593.38	1593.38	1593.38	1593.44		809.484	1212		542.484	1060.5	1060.5	1061.02	1061.4	1061.31	1060.5	1062.73		409.484	878.667		354.484	994	789.17	789.169	941.808	808.298	789.169	960.937		299.484	399.667	403.684	403.684	403.684	403.7	403.707	403.73
1157.08	39034.2		1309.38	2549.33	2536.32	2528.78	2536.32		1089.38	1573	1573.07	1573	1573	1573	1573	1573.07		809.384	1254		542.384	1128	1128	1128.54	1128.93	1128.85	1128	1130.32		409.384	845.333		354.384	1018.67	788.553	788.553	966.513	815.604	788.553	993.564		299.384	410.333	403.661	403.661	403.661	403.678	403.686	403.708
1156.08	40029.1		1309.28	2597.33	2536.74	2528.22	2536.74		1089.28	1583.62	1583.69	1583.62	1583.62	1583.63	1583.62	1583.69		809.284	1264		542.284	1080	1080	1080.56	1080.96	1080.88	1080	1082.41		409.284	861.333		354.284	1043.33	787.869	787.868	991.511	825.785	787.868	1029.43		299.284	427	403.581	403.581	403.581	403.598	403.607	403.63
1155.08	40612		1309.18	2514	2537.78	2528.11	2537.78		1089.18	1584.25	1584.32	1584.25	1584.25	1584.25	1584.25	1584.32		809.184	1220		542.184	1087.5	1087.5	1088.08	1088.5	1088.4	1087.5	1089.97		409.184	869.333		354.184	1074.67	787.098	787.097	1015.59	839.404	787.097	1067.9		299.184	408.333	403.565	403.565	403.565	403.583	403.591	403.616
1154.08	40702.5		1309.08	2529.33	2539.13	2528.1	2539.13		1089.08	1575.12	1575.19	1575.12	1575.12	1575.13	1575.12	1575.2		809.084	1236		542.084	1061	1061	1061.6	1062.03	1061.94	1061	1063.56		409.084	855.333		354.084	1096	786.269	786.267	1037.54	857.517	786.267	1108.79		299.084	401	403.556	403.556	403.556	403.575	403.584	403.61
1153.08	39737.7		1308.98	2584.67	2540.3	2527.64	2540.3		1088.98	1588.25	1588.32	1588.25	1588.25	1588.25	1588.25	1588.32		808.984	1227.33		541.984	1076	1076	1076.62	1077.06	1076.98	1076	1078.66		408.984	860.667		353.984	1115.33	785.386	785.383	1055.93	881.182	785.383	1151.73		298.984	413.667	403.522	403.522	403.522	403.541	403.55	403.578
1152.08	39566.8		1308.88	2478.67	2541.84	2527.25	2541.84		1088.88	1601.12	1601.2	1601.12	1601.12	1601.13	1601.12	1601.2		808.884	1266.67		541.884	1072.5	1072.5	1073.14	1073.6	1073.53	1072.5	1075.27		408.884	835.333		353.884	1190.67	784.299	784.294	1069.31	911.117	784.294	1196.14		298.884	429.333	403.433	403.433	403.433	403.453	403.463	403.492
1151.08	40843.2		1308.78	2514	2544.05	2527.15	2544.05		1088.78	1587.12	1587.2	1587.13	1587.12	1587.13	1587.12	1587.2		808.784	1236.67		541.784	1054.5	1054.5	1055.16	1055.65	1055.57	1054.5	1057.39		408.784	841.333		353.784	1236.67	783.088	783.078	1076.92	949.046	783.078	1242.9		298.784	408	403.418	403.418	403.418	403.438	403.448	403.48
1150.08	40340.7		1308.68	2559.33	2546.55	2526.89	2546.55		1088.68	1583.5	1583.58	1583.5	1583.5	1583.5	1583.5	1583.58		808.684	1245.33		541.684	1025	1025	1025.68	1026.2	1026.12	1025	1028.01		408.684	886		353.684	1288	781.738	781.721	1077.7	995.51	781.721	1291.5		298.684	416.333	403.373	403.373	403.373	403.394	403.406	403.439
1149.08	39164.8		1308.58	2543.33	2549.7	2526.75	2549.7		1088.58	1575	1575.08	1575	1575	1575	1575	1575.08		808.584	1260		541.584	1054	1054	1054.7	1055.25	1055.18	1054	1057.13		408.584	862		353.584	1332.67	780.269	780.241	1071.89	1051.67	780.241	1343.35		298.584	434.333	403.267	403.267	403.267	403.289	403.301	403.336
1148.08	39184.9		1308.48	2570	2553.27	2526.4	2553.27		1088.48	1578.5	1578.58	1578.5	1578.5	1578.5	1578.5	1578.58		808.484	1262		541.484	1043.5	1043.5	1044.23	1044.8	1044.74	1043.5	1046.77		408.484	850		353.484	1341.33	778.78	778.733	1059.74	1118.28	778.733	1399.34		298.484	436	403.155	403.155	403.155	403.178	403.19	403.228
1147.08	39828.2		1308.38	2610	2557.25	2525.72	2557.25		1088.38	1573	1573.08	1573	1573	1573	1573	1573.08		808.384	1214.67		541.384	1028	1028	1028.77	1029.35	1029.3	1028	1031.41		408.384	859.333		353.384	1472	776.947	776.87	1041.68	1194.69	776.87	1459.57		298.384	421	403.094	403.094	403.094	403.117	403.131	403.17
1146.08	40370.8		1308.28	2590.67	2562.23	2525.2	2562.23		1088.28	1593.25	1593.33	1593.25	1593.25	1593.25	1593.25	1593.33		808.284	1223.33		541.284	1043.5	1043.5	1044.3	1044.89	1044.87	1043.5	1047.06		408.284	885.333		353.284	1522.67	774.991	774.866	1019.2	1281.12	774.866	1525.58		298.284	422	403.029	403.029	403.029	403.053	403.067	403.11
1145.08	40220.1		1308.18	2630.67	2567.86	2524.34	2567.86		1088.18	1583.38	1583.46	1583.38	1583.38	1583.38	1583.38	1583.46		808.184	1235.33		541.184	1081.5	1081.5	1082.33	1082.94	1082.94	1081.5	1085.21		408.184	896		353.184	1635.33	772.756	772.554	993.258	1375.35	772.553	1596.26		298.184	422.333	402.963	402.963	402.963	402.988	403.003	403.048
1144.08	40602		1308.08	2614	2574.73	2523.62	2574.73		1088.08	1576.62	1576.71	1576.63	1576.62	1576.63	1576.62	1576.71		808.084	1251.33		541.084	1010	1010	1010.86	1011.49	1011.51	1010	1013.87		408.084	904		353.084	1688.67	770.412	770.093	965.533	1475.24	770.091	1671.01		298.084	429	402.874	402.874	402.874	402.9	402.915	402.964
1143.08	40159.8		1307.98	2637.33	2582.64	2522.7	2582.64		1087.98	1580.62	1580.71	1580.63	1580.62	1580.63	1580.62	1580.71		807.984	1252.67		540.984	1003	1003	1003.89	1004.55	1004.59	1003	1007.03		407.984	864.667		352.984	1710	768.069	767.568	937.332	1577.33	767.566	1747.6		297.984	437.667	402.755	402.755	402.755	402.782	402.798	402.85
1142.08	39958.8		1307.88	2600.67	2592.24	2522.07	2592.24		1087.88	1583.75	1583.84	1583.75	1583.75	1583.75	1583.75	1583.84		807.884	1240.67		540.884	1016.5	1016.5	1017.43	1018.13	1018.18	1016.5	1020.74		407.884	881.333		352.884	1804.67	765.558	764.783	909.56	1676.94	764.779	1822.51		297.884	443	402.617	402.617	402.617	402.645	402.663	402.718
1141.08	40692.4		1307.78	2580	2603.49	2521.6	2603.49		1087.78	1557.25	1557.34	1557.25	1557.25	1557.25	1557.25	1557.34		807.784	1222		540.784	1006	1016.5	1017.46	1018.21	1018.27	1016.5	1020.94		407.784	872		352.784	1870	762.996	761.816	883.082	1768.54	761.808	1891.01		297.784	439.333	402.491	402.491	402.491	402.521	402.539	402.598
1140.08	41074.3		1307.68	2614	2616.07	2520.85	2616.07		1087.68	1571.62	1571.72	1571.63	1571.62	1571.63	1571.62	1571.72		807.684	1244.67		540.684	1007.5	1016.49	1017.49	1018.29	1018.37	1016.49	1021.16		407.684	870		352.684	1914.67	760.506	758.724	858.648	1847.05	758.71	1948.79		297.684	418.667	402.436	402.436	402.436	402.466	402.486	402.549
1139.08	40340.7		1307.58	2629.33	2630.18	2519.97	2630.18		1087.58	1577.38	1577.47	1577.38	1577.38	1577.38	1577.38	1577.47		807.584	1251.33		540.584	1026	1016.49	1017.51	1018.37	1018.47	1016.49	1021.38		407.584	866		352.584	1970	758.124	755.48	836.454	1906.98	755.455	1990.67		297.584	407.333	402.419	402.419	402.419	402.451	402.472	402.54
1138.08	40571.8		1307.48	2722	2645.28	2518.33	2645.28		1087.48	1578.12	1578.22	1578.13	1578.12	1578.13	1578.12	1578.22		807.484	1263.33		540.484	1001	1016.48	1017.56	1018.39	1018.59	1016.48	1021.57		407.484	906.667		352.484	2030.67	755.955	752.071	816.649	1943.41	752.028	2012		297.484	398.333	402.405	402.405	402.405	402.438	402.46	402.534
1137.08	41074.3		1307.38	2688	2662.38	2516.96	2662.38		1087.38	1573.38	1573.47	1573.38	1573.38	1573.38	1573.38	1573.47		807.384	1264		540.384	1010.5	1016.48	1017.62	1018.47	1018.71	1016.48	1021.84		407.384	878		352.384	1968	754.459	748.833	799.578	1954.8	748.761	2011.39		297.384	405	402.396	402.396	402.396	402.431	402.454	402.533
1136.08	40210		1307.28	2746.67	2680.66	2515.1	2680.66		1087.28	1596.5	1596.6	1596.5	1596.5	1596.5	1596.5	1596.6		807.284	1256.67		540.284	1000.5	1016.48	1017.67	1018.56	1018.85	1016.48	1022.12		407.284	844.667		352.284	1988.67	753.576	745.553	784.758	1938.32	745.429	1985.92		297.284	412.667	402.361	402.361	402.361	402.397	402.422	402.507
1135.08	40280.4		1307.18	2762	2700.36	2513.1	2700.36		1087.18	1590.75	1590.85	1590.75	1590.75	1590.75	1590.75	1590.85		807.184	1239.33		540.184	1011.5	1016.47	1017.72	1018.65	1018.99	1016.47	1022.41		407.184	833.333		352.184	1937.33	753.765	742.433	772.281	1896.38	742.226	1938.18		297.184	410	402.335	402.335	402.335	402.373	402.4	402.491
1134.08	41426.1		1307.08	2716	2721.79	2511.45	2721.79		1087.08	1598.5	1598.6	1598.5	1598.5	1598.5	1598.5	1598.61		807.084	1193.33		540.084	1001	1016.47	1017.73	1018.75	1019.15	1016.47	1022.69		407.084	866		352.084	1910.67	755.17	739.429	761.716	1831.47	739.086	1870.53		297.084	400	402.327	402.327	402.327	402.366	402.395	402.494
1133.08	41787.9		1306.98	2713.33	2744.36	2509.82	2744.36		1086.98	1577	1577.11	1577	1577	1577	1577	1577.11		806.984	1268.67		539.984	1007	1016.47	1017.78	1018.85	1019.33	1016.47	1023.03		406.984	844.667		351.984	1779.33	758.449	736.852	753.089	1747.79	736.29	1787.31		296.984	421.667	402.261	402.261	402.261	402.302	402.333	402.44
1132.08	40853.2		1306.88	2779.33	2767.18	2507.63	2767.18		1086.88	1569.88	1569.98	1569.88	1569.88	1569.88	1569.88	1569.98		806.884	1280		539.884	1005	1016.46	1017.84	1018.96	1019.52	1016.46	1023.4		406.884	900		351.884	1729.33	763.737	734.524	745.945	1651.12	733.622	1694.46		296.884	398.667	402.249	402.249	402.249	402.291	402.324	402.442
1131.08	41637.1		1306.78	2723.33	2790.85	2505.89	2790.85		1086.78	1572.62	1572.73	1572.63	1572.62	1572.63	1572.62	1572.74		806.784	1279.33		539.784	992	1016.45	1017.89	1019.08	1019.72	1016.45	1023.79		406.784	855.333		351.784	1640.67	771.506	732.625	740.083	1546.58	731.184	1597.25		296.784	421	402.184	402.184	402.184	402.229	402.263	402.392
1130.08	42240.1		1306.68	2781.33	2813.99	2503.66	2813.99		1086.68	1586.38	1586.48	1586.38	1586.38	1586.38	1586.38	1586.49		806.684	1263.33		539.684	1006.5	1016.45	1017.96	1019.21	1019.95	1016.45	1024.22		406.684	896.667		351.684	1544	782.373	731.26	735.358	1439.8	729	1501.79		296.684	436.667	402.066	402.066	402.066	402.114	402.15	402.291
1129.08	41084.4		1306.58	2790.67	2836.49	2501.33	2836.49		1086.58	1586	1586.11	1586	1586	1586	1586	1586.12		806.584	1258.67		539.584	1003	1016.44	1018.02	1019.34	1020.2	1016.44	1024.68		406.584	846.667		351.584	1452	796.599	730.565	731.536	1335.22	727.057	1412.75		296.584	413.667	402.027	402.027	402.027	402.076	402.116	402.269
1128.08	41225.1		1306.48	2860.67	2857.31	2498.42	2857.31		1086.48	1595	1595.12	1595	1595	1595	1595	1595.12		806.484	1222		539.484	1028.5	1016.44	1018.1	1019.49	1020.48	1016.44	1025.19		406.484	890.667		351.484	1329.33	814.818	730.814	728.549	1236.73	725.438	1334.59		296.484	410.667	401.997	401.997	401.997	402.049	402.093	402.26
1127.08	41014		1306.38	2786	2877.06	2496.09	2877.06		1086.38	1574.75	1574.87	1574.75	1574.75	1574.75	1574.75	1574.87		806.384	1312		539.384	1023.5	1016.44	1018.18	1019.65	1020.79	1016.44	1025.74		406.384	871.333		351.384	1252	837.214	732.128	726.162	1146.42	724.023	1269.85		296.384	432.333	401.893	401.893	401.893	401.947	401.995	402.179
1126.08	40742.7		1306.28	2844	2894.14	2493.27	2894.14		1086.28	1594.12	1594.25	1594.13	1594.12	1594.13	1594.12	1594.25		806.284	1272.67		539.284	1042	1016.43	1018.25	1019.81	1021.13	1016.43	1026.34		406.284	890.667		351.284	1176	863.874	734.939	724.255	1066.3	722.809	1220.94		296.284	427.667	401.805	401.805	401.805	401.861	401.91	402.117
1125.08	40300.5		1306.18	2851.33	2908.46	2490.37	2908.46		1086.18	1602	1602.12	1602	1602	1602	1602	1602.13		806.184	1252		539.184	1021	1016.42	1018.34	1019.99	1021.51	1016.42	1027		406.184	862		351.184	1174.67	894.833	739.445	722.563	996.491	721.595	1188.55		296.184	435.667	401.689	401.689	401.689	401.748	401.801	402.03
1124.08	40692.4		1306.08	2888.67	2919.3	2487.14	2919.3		1086.08	1562.38	1562.5	1562.38	1562.38	1562.38	1562.38	1562.5		806.084	1264.67		539.084	1050	1016.41	1018.43	1020.18	1021.93	1016.41	1027.72		406.084	860		351.084	1172	929.522	746.354	721.024	936.953	720.384	1172.7		296.084	414	401.647	401.647	401.647	401.71	401.766	402.021
1123.08	40501.5		1305.98	2882	2926.55	2483.94	2926.55		1085.98	1584.75	1584.88	1584.75	1584.75	1584.75	1584.75	1584.88		805.984	1282		538.984	1022	1016.41	1018.54	1020.39	1022.41	1016.41	1028.52		405.984	848		350.984	1162	967.428	756.508	719.614	887.524	719.197	1173.48		295.984	449.333	401.483	401.483	401.483	401.55	401.611	401.895
1122.08	40370.8		1305.88	2977.33	2929.16	2479.95	2929.16		1085.88	1578.12	1578.26	1578.13	1578.12	1578.13	1578.12	1578.26		805.884	1251.33		538.884	1003.5	1016.41	1018.64	1020.62	1022.95	1016.41	1029.41		405.884	839.333		350.884	1186.67	1007.35	770.704	718.21	846.723	717.941	1189.17		295.884	442	401.345	401.345	401.345	401.415	401.481	401.8
1121.08	40732.6		1305.78	2968	2927.78	2475.99	2927.78		1085.78	1596.5	1596.63	1596.5	1596.5	1596.5	1596.5	1596.64		805.784	1278		538.784	1056	1016.39	1018.75	1020.86	1023.55	1016.39	1030.38		405.784	874.667		350.784	1212	1047.79	790.571	716.784	813.891	716.613	1219.2		295.784	435	401.229	401.229	401.229	401.304	401.375	401.734
1120.08	41466.3		1305.68	2910	2922.74	2472.48	2922.74		1085.68	1584	1584.14	1584	1584	1584	1584	1584.14		805.684	1279.33		538.684	1053.5	1016.38	1018.87	1021.11	1024.24	1016.38	1031.47		405.684	867.333		350.684	1266	1086.73	817.161	715.244	787.589	715.137	1261.31		295.684	456	401.042	401.042	401.042	401.12	401.197	401.605
1119.08	42511.5		1305.58	2926.67	2913.46	2468.8	2913.46		1085.58	1586.25	1586.39	1586.25	1586.25	1586.25	1586.25	1586.39		805.584	1285.33		538.584	1059	1016.36	1019	1021.39	1025.02	1016.36	1032.68		405.584	878.667		350.584	1314.67	1122.16	852.5	713.592	766.694	713.526	1314.37		295.584	457	400.85	400.85	400.85	400.932	401.017	401.481
1118.08	42350.7		1305.48	2976.67	2899.77	2464.68	2899.77		1085.48	1587.5	1587.64	1587.5	1587.5	1587.5	1587.5	1587.65		805.484	1266.67		538.484	1047.5	1016.35	1019.14	1021.7	1025.93	1016.35	1034.06		405.484	884.667		350.484	1364.67	1151.76	898.632	711.817	750.374	711.776	1377.25		295.484	461.333	400.643	400.643	400.643	400.729	400.823	401.354
1117.08	42069.3		1305.38	2972.67	2882.46	2460.57	2882.46		1085.38	1593.62	1593.77	1593.63	1593.62	1593.63	1593.62	1593.77		805.384	1251.33		538.384	1081.5	1016.33	1019.28	1022.02	1026.97	1016.33	1035.61		405.384	896		350.384	1426.67	1173.36	957.226	709.879	737.438	709.855	1448.34		295.384	452	400.467	400.467	400.467	400.56	400.661	401.275
1116.08	40823.1		1305.28	2957.33	2861.99	2456.55	2861.99		1085.28	1613.75	1613.9	1613.75	1613.75	1613.75	1613.75	1613.9		805.284	1270		538.284	1068.5	1016.31	1019.44	1022.38	1028.18	1016.31	1037.38		405.284	861.333		350.284	1536	1185.51	1031.36	707.649	727.125	707.635	1528.73		295.284	456	400.277	400.277	400.277	400.376	400.486	401.2
1115.08	41084.4		1305.18	2842	2839.6	2453.42	2839.6		1085.18	1594.25	1594.4	1594.25	1594.25	1594.25	1594.25	1594.41		805.184	1250		538.184	1067.5	1016.29	1019.61	1022.77	1029.62	1016.29	1039.42		405.184	893.333		350.184	1638	1186.47	1122.13	705.143	718.724	705.135	1617.07		295.184	442	400.134	400.134	400.134	400.239	400.36	401.198
1114.08	40853.2		1305.08	2817.33	2815.06	2450.47	2815.06		1085.08	1589.25	1589.41	1589.25	1589.25	1589.25	1589.25	1589.41		805.084	1281.33		538.084	1092.5	1016.26	1019.79	1023.2	1031.32	1016.26	1041.78		405.084	863.333		350.084	1689.33	1176.79	1231.92	702.495	711.821	702.49	1715.55		295.084	455.333	399.945	399.945	399.945	400.053	400.19	401.182
1113.08	41687.4		1304.98	2799.33	2788.84	2447.65	2788.84		1084.98	1601.38	1601.54	1601.38	1601.38	1601.38	1601.38	1601.54		804.984	1256		537.984	1074	1016.24	1020	1023.67	1033.36	1016.24	1044.54		404.984	857.333		349.984	1836.67	1156.44	1361.73	699.445	705.794	699.442	1825.08		294.984	446.667	399.785	399.785	399.785	399.9	400.052	401.235
1112.08	41476.3		1304.88	2744	2761.84	2445.25	2761.84		1084.88	1586.75	1586.92	1586.75	1586.75	1586.75	1586.75	1586.92		804.884	1265.33		537.884	1133.5	1016.2	1020.2	1024.17	1035.8	1016.2	1047.78		404.884	890.667		349.884	1930	1126.78	1511.1	696.137	700.388	696.135	1946		294.884	439.333	399.649	399.649	399.649	399.772	399.94	401.364
1111.08	41938.6		1304.78	2746	2734.13	2442.81	2734.13		1084.78	1600	1600.17	1600	1600	1600	1600	1600.17		804.784	1236		537.784	1141.5	1016.15	1020.43	1024.73	1038.78	1016.15	1051.63		404.784	895.333		349.784	2120.67	1089.66	1679.76	692.308	695.124	692.307	2079.93		294.784	435	399.528	399.528	399.528	399.659	399.846	401.575
1110.08	42199.9		1304.68	2646	2707.03	2441.16	2707.03		1084.68	1602.12	1602.3	1602.13	1602.12	1602.13	1602.12	1602.3		804.684	1262		537.684	1146.5	1016.11	1020.68	1025.34	1042.44	1016.11	1056.25		404.684	883.333		349.684	2234.67	1047.09	1863.92	688.163	690.005	688.162	2224.69		294.684	423.333	399.447	399.447	399.447	399.587	399.795	401.911
1109.08	42662.2		1304.58	2686.67	2679.9	2439.18	2679.9		1084.58	1601	1601.18	1601	1601	1601	1601	1601.18		804.584	1274		537.584	1154.5	1016.05	1020.95	1026.03	1046.96	1016.05	1061.83		404.584	908.667		349.584	2344.67	1001.55	2059.12	683.711	684.895	683.711	2378.14		294.584	429.333	399.344	399.344	399.344	399.494	399.727	402.336
1108.08	41757.7		1304.48	2622	2653.98	2437.7	2653.98		1084.48	1599	1599.18	1599	1599	1599	1599	1599.19		804.484	1246		537.484	1153.5	1016	1021.26	1026.8	1052.6	1016	1068.65		404.484	872		349.484	2562.67	954.746	2258.11	678.661	679.418	678.661	2534.95		294.484	436	399.219	399.219	399.219	399.379	399.641	402.873
1107.08	41828.1		1304.38	2660.67	2628.79	2435.89	2628.79		1084.38	1600.25	1600.44	1600.25	1600.25	1600.25	1600.25	1600.44		804.384	1270.67		537.384	1177	1015.95	1021.59	1027.65	1059.65	1015.95	1077		404.384	862		349.384	2731.33	908.598	2452.33	673.145	673.62	673.145	2688.26		294.384	443.333	399.068	399.068	399.068	399.24	399.534	403.555
1106.08	42712.5		1304.28	2587.33	2605.5	2434.66	2605.5		1084.28	1583.38	1583.57	1583.38	1583.38	1583.38	1583.38	1583.57		804.284	1258.67		537.284	1192.5	1015.88	1021.96	1028.62	1068.48	1015.88	1087.3		404.284	851.333		349.284	2826	864.583	2631	667.36	667.655	667.36	2828.52		294.284	433.333	398.95	398.95	398.95	399.136	399.469	404.482
1105.08	42300.4		1304.18	2529.33	2584.18	2433.89	2584.18		1084.18	1599.12	1599.32	1599.13	1599.12	1599.13	1599.12	1599.32		804.184	1274		537.184	1238.5	1015.8	1022.36	1029.69	1079.56	1015.8	1100.01		404.184	885.333		349.184	2977.33	823.677	2783.96	661.152	661.333	661.152	2946.67		294.184	426.667	398.856	398.856	398.856	399.055	399.434	405.688
1104.08	41345.7		1304.08	2520.67	2564.59	2433.19	2564.59		1084.08	1596.75	1596.95	1596.75	1596.75	1596.75	1596.75	1596.95		804.084	1229.33		537.084	1275.5	1015.71	1022.8	1030.9	1093.44	1015.71	1115.73		404.084	892		349.084	3038	786.49	2900.82	654.765	654.874	654.765	3032.65		294.084	429.667	398.75	398.75	398.75	398.965	399.399	407.186
1103.08	42400.9		1303.98	2487.33	2546.99	2432.75	2546.99		1083.98	1591.75	1591.95	1591.75	1591.75	1591.75	1591.75	1591.96		803.984	1288		536.984	1282	1015.61	1023.3	1032.28	1110.8	1015.61	1135.17		403.984	878.667		348.984	3071.33	753.361	2972.07	648.27	648.336	648.27	3077.22		293.984	431.667	398.637	398.637	398.637	398.87	399.368	409.03
1102.08	41627.1		1303.88	2586.67	2530.31	2431.51	2530.31		1083.88	1585.12	1585.34	1585.13	1585.12	1585.13	1585.12	1585.34		803.884	1310		536.884	1304	1015.5	1023.86	1033.87	1132.39	1015.5	1159.12		403.884	882		348.884	3013.33	724.558	2994.3	641.915	641.953	641.915	3076.98		293.884	425	398.547	398.547	398.547	398.8	399.375	411.298
1101.08	41305.5		1303.78	2489.33	2516.1	2431.04	2516.1		1083.78	1596.12	1596.34	1596.13	1596.12	1596.13	1596.12	1596.35		803.784	1278		536.784	1396.5	1015.36	1024.47	1035.67	1159.03	1015.36	1188.44		403.784	882.667		348.784	3001.33	699.534	2962.32	635.574	635.597	635.574	3026.3		293.784	438.667	398.41	398.41	398.41	398.684	399.355	413.967
1100.08	41838.1		1303.68	2502.67	2503.4	2430.46	2503.4		1083.68	1624.62	1624.85	1624.63	1624.62	1624.63	1624.62	1624.85		803.684	1272.67		536.684	1363	1015.24	1025.2	1037.79	1191.64	1015.24	1224.16		403.684	904		348.684	2912.67	678.333	2880.64	629.455	629.468	629.455	2929.54		293.684	426	398.315	398.315	398.315	398.614	399.402	417.161
1099.08	41737.6		1303.58	2440.67	2492.74	2430.38	2492.74		1083.58	1606.75	1606.98	1606.75	1606.75	1606.75	1606.75	1606.98		803.584	1249.33		536.584	1469	1015.07	1025.99	1040.24	1231.12	1015.07	1267.21		403.584	888		348.584	2772.67	660.499	2754.41	623.696	623.703	623.696	2791.22		293.584	426.667	398.218	398.218	398.218	398.544	399.478	420.847
1098.08	42380.8		1303.48	2464	2483.3	2430.1	2483.3		1083.48	1597.12	1597.36	1597.13	1597.12	1597.13	1597.12	1597.37		803.484	1271.33		536.484	1493.5	1014.9	1026.91	1043.15	1278.38	1014.9	1318.65		403.484	866		348.484	2630.67	645.622	2591.24	618.302	618.306	618.302	2618.56		293.484	424	398.13	398.13	398.13	398.487	399.605	425.031
1097.08	41697.4		1303.38	2456	2475.2	2429.89	2475.2		1083.38	1596	1596.25	1596	1596	1596	1596	1596.25		803.384	1264		536.384	1519	1014.71	1027.99	1046.61	1334.13	1014.71	1379.31		403.384	898		348.384	2458	633.4	2402.95	613.358	613.361	613.358	2422.99		293.384	429	398.024	398.024	398.024	398.417	399.772	429.655
1096.08	42230.1		1303.28	2457.33	2468.22	2429.67	2468.22		1083.28	1596.38	1596.62	1596.38	1596.38	1596.38	1596.38	1596.62		803.284	1253.33		536.284	1589.5	1014.5	1029.23	1050.77	1398.89	1014.5	1449.88		403.284	904.667		348.284	2219.33	623.515	2199.49	609.043	609.044	609.043	2213.96		293.284	451	397.843	397.843	397.843	398.275	399.941	434.595
1095.08	41888.4		1303.18	2463.33	2462.2	2429.4	2462.2		1083.18	1597.5	1597.76	1597.5	1597.5	1597.5	1597.5	1597.76		803.184	1295.33		536.184	1658	1014.27	1030.68	1055.79	1472.86	1014.27	1530.8		403.184	855.333		348.184	2056.67	615.493	1991.57	605.152	605.153	605.152	2001.91		293.184	438	397.705	397.705	397.705	398.184	400.262	439.871
1094.08	42169.8		1303.08	2511.33	2456.69	2428.73	2456.69		1083.08	1573.25	1573.51	1573.25	1573.25	1573.25	1573.25	1573.52		803.084	1231.33		536.084	1681	1014.02	1032.42	1061.95	1555.83	1014.02	1622.15		403.084	844		348.084	1845.33	609.104	1788.04	601.82	601.82	601.82	1795.33		293.084	455.667	397.507	397.507	397.507	398.038	400.673	445.24
1093.08	42260.2		1302.98	2476	2452.22	2428.35	2452.22		1082.98	1602.12	1602.39	1602.13	1602.12	1602.13	1602.12	1602.4		802.984	1224		535.984	1742	1013.76	1034.5	1069.52	1647.07	1013.76	1723.58		402.984	886.667		347.984	1616.67	604.151	1596.37	599.092	599.093	599.092	1601.42		292.984	450.333	397.326	397.326	397.326	397.918	401.311	450.614
1092.08	42119.5		1302.88	2496	2448.23	2427.8	2448.23		1082.88	1611.62	1611.9	1611.63	1611.62	1611.63	1611.62	1611.91		802.884	1230		535.884	1867	1013.45	1036.98	1078.89	1745.24	1013.45	1834.22		402.884	868		347.884	1370.67	600.497	1420.91	597.019	597.019	597.019	1424.38		292.884	458.333	397.117	397.117	397.117	397.781	402.214	455.758
1091.08	42009		1302.78	2430	2445.33	2427.78	2445.33		1082.78	1623.38	1623.66	1623.38	1623.38	1623.38	1623.38	1623.66		802.784	1271.33		535.784	1958	1013.1	1040	1090.56	1848.42	1013.1	1952.77		402.784	850.667		347.784	1214	597.713	1265.34	595.361	595.361	595.361	1267.69		292.784	467.667	396.875	396.875	396.875	397.623	403.496	460.463
1090.08	41727.6		1302.68	2438	2442.83	2427.7	2442.83		1082.68	1602.88	1603.17	1602.88	1602.88	1602.88	1602.88	1603.17		802.684	1268		535.684	2037.5	1012.73	1043.71	1105.21	1954.06	1012.73	2077.51		402.684	855.333		347.684	1094.67	595.595	1130.21	594.019	594.019	594.019	1131.78		292.684	479.333	396.593	396.593	396.593	397.44	405.298	464.51
1089.08	42079.3		1302.58	2440.67	2440.7	2427.6	2440.7		1082.58	1605.88	1606.18	1605.88	1605.88	1605.88	1605.88	1606.18		802.584	1193.33		535.584	2169.5	1012.31	1048.29	1123.59	2059.05	1012.31	2206.32		402.584	853.333		347.584	983.333	594.014	1015.39	592.973	592.973	592.973	1016.43		292.584	480.667	396.305	396.305	396.305	397.271	407.845	467.747
1088.08	42722.5		1302.48	2430	2438.99	2427.58	2438.99		1082.48	1570.62	1570.94	1570.63	1570.62	1570.63	1570.62	1570.94		802.484	1240.67		535.484	2216	1011.87	1054	1146.74	2159.91	1011.87	2336.91		402.484	904.667		347.484	910.667	592.796	920.441	592.119	592.119	592.119	921.118		292.484	490	395.984	395.984	395.984	397.093	411.346	469.982
1087.08	41777.8		1302.38	2510.67	2436.89	2426.91	2436.89		1082.38	1594.62	1594.95	1594.63	1594.62	1594.63	1594.62	1594.95		802.384	1280		535.384	2364.5	1011.38	1061.13	1175.8	2252.86	1011.38	2467.05		402.384	888		347.384	819.333	591.946	842.7	591.509	591.509	591.509	843.137		292.384	509	395.597	395.597	395.597	396.881	416.032	471.06
1086.08	42240.1		1302.28	2506	2435.05	2426.26	2435.05		1082.28	1605.5	1605.83	1605.5	1605.5	1605.5	1605.5	1605.84		802.284	1281.33		535.284	2464.5	1010.85	1070.13	1212.18	2334.21	1010.85	2594.83		402.284	872.667		347.284	731.333	591.41	780.874	591.133	591.133	591.133	781.15		292.284	509.333	395.207	395.207	395.208	396.709	422.231	470.97
1085.08	41275.3		1302.18	2486	2433.55	2425.78	2433.55		1082.18	1587.62	1587.97	1587.63	1587.62	1587.63	1587.62	1587.97		802.184	1252.67		535.184	2642	1010.25	1081.45	1257.47	2400.46	1010.25	2718.88		402.184	838		347.184	683.333	591.059	732.203	590.885	590.885	590.885	732.377		292.184	503.667	394.836	394.836	394.837	396.613	430.214	469.709
1084.08	42250.2		1302.08	2452.67	2432.47	2425.56	2432.47		1082.08	1601.5	1601.86	1601.5	1601.5	1601.5	1601.5	1601.86		802.084	1263.33		535.084	2777	1009.61	1095.76	1313.45	2448.64	1009.61	2838.63		402.084	872		347.084	729.333	590.621	694.217	590.513	590.513	590.513	694.325		292.084	509.333	394.444	394.444	394.445	396.574	440.127	467.294
1083.08	42340.6		1301.98	2422.67	2431.71	2425.54	2431.71		1081.98	1595.5	1595.87	1595.5	1595.5	1595.5	1595.5	1595.87		801.984	1232		534.984	2801.5	1008.95	1113.84	1382.07	2476.55	1008.95	2954.55		401.984	859.333		346.984	676	590.349	665.569	590.283	590.283	590.283	665.635		291.984	524.667	393.998	393.998	394.001	396.589	451.968	463.789
1082.08	42260.2		1301.88	2403.33	2430.9	2425.36	2430.9		1081.88	1595.5	1595.88	1595.5	1595.5	1595.5	1595.5	1595.88		801.884	1280		534.884	3003	1008.23	1136.53	1465.22	2482.77	1008.23	3068.07		401.884	898		346.884	626	590.227	643.989	590.187	590.187	590.187	644.029		291.884	542.667	393.488	393.488	393.495	396.69	465.585	459.331
1081.08	41918.5		1301.78	2364.67	2429.87	2424.88	2429.87		1081.78	1605.62	1606.02	1605.63	1605.62	1605.63	1605.62	1606.02		801.784	1276.67		534.784	3165	1007.44	1164.9	1564.76	2467	1007.44	3181.79		401.784	896.667		346.784	632	590.099	628.09	590.075	590.075	590.075	628.113		291.784	546.333	392.965	392.965	392.976	396.987	480.659	454.144
1080.08	42280.3		1301.68	2436.67	2429.3	2424.78	2429.3		1081.68	1590.38	1590.78	1590.38	1590.38	1590.38	1590.38	1590.78		801.684	1265.33		534.684	3278	1006.61	1200.13	1682.39	2429.95	1006.61	3299.25		401.684	913.333		346.684	611.333	590.032	616.525	590.018	590.018	590.018	616.539		291.684	570.333	392.358	392.358	392.377	397.494	496.472	448.36
1079.08	42973.8		1301.58	2422	2428.87	2424.76	2428.87		1081.58	1607.25	1607.67	1607.25	1607.25	1607.25	1607.25	1607.67		801.584	1250.67		534.584	3492	1005.7	1243.44	1819.11	2373.22	1005.7	3424.36		401.584	860		346.584	628.667	589.922	608.115	589.914	589.914	589.914	608.123		291.584	560.667	391.781	391.781	391.815	398.439	512.269	442.305
1078.08	42933.6		1301.48	2496.67	2427.93	2424.18	2427.93		1081.48	1596.75	1597.19	1596.75	1596.75	1596.75	1596.75	1597.19		801.484	1309.33		534.484	3640	1004.74	1296.15	1975.4	2299.41	1004.74	3561.48		401.484	830		346.484	632.667	589.804	602.19	589.799	589.799	589.799	602.194		291.484	576.333	391.149	391.149	391.208	399.892	526.911	436.089
1077.08	42431.1		1301.38	2446.67	2427.43	2424	2427.43		1081.38	1590.88	1591.33	1590.88	1590.88	1590.88	1590.88	1591.33		801.384	1250		534.384	3797.5	1003.72	1359.54	2150.84	2211.76	1003.72	3714.69		401.384	884		346.384	584	589.786	598.08	589.784	589.784	589.784	598.082		291.384	573.667	390.524	390.524	390.623	402.108	539.336	429.955
1076.08	44692.3		1301.28	2479.33	2426.71	2423.55	2426.71		1081.28	1593.38	1593.84	1593.38	1593.38	1593.38	1593.38	1593.85		801.284	1290		534.284	4069	1002.61	1434.74	2343.84	2113.83	1002.61	3887.21		401.284	880		346.284	598.667	589.761	595.255	589.76	589.76	589.76	595.256		291.284	605.333	389.788	389.788	389.952	405.203	548.386	423.936
1075.08	44059.2		1301.18	2452	2426.23	2423.32	2426.23		1081.18	1591.62	1592.11	1591.63	1591.62	1591.63	1591.62	1592.11		801.184	1258		534.184	4260	1001.42	1522.59	2551.68	2009.4	1001.42	4080.84		401.184	877.333		346.184	644.667	589.613	593.206	589.612	589.612	589.612	593.207		291.184	614.667	389.018	389.018	389.286	409.527	553.288	418.231
1074.08	43828		1301.08	2429.33	2425.96	2423.27	2425.96		1081.08	1598.5	1599	1598.5	1598.5	1598.5	1598.5	1599.01		801.084	1234.67		534.084	4427.5	1000.17	1623.51	2770.28	1902.14	1000.17	4295.6		401.084	901.333		346.084	598	589.59	591.901	589.59	589.59	589.59	591.901		291.084	613	388.251	388.251	388.68	415.403	553.555	412.956
1073.08	44139.6		1300.98	2456.67	2425.49	2423	2425.49		1080.98	1602.75	1603.27	1602.75	1602.75	1602.75	1602.75	1603.28		800.984	1255.33		533.984	4579	998.861	1737.38	2994.27	1795.42	998.861	4529.35		400.984	910.667		345.984	580	589.564	591.041	589.564	589.564	589.564	591.041		290.984	600.667	387.523	387.523	388.198	423.122	549.158	408.198
1072.08	43818		1300.88	2411.33	2425.22	2422.91	2425.22		1080.88	1598.38	1598.92	1598.38	1598.38	1598.38	1598.38	1598.92		800.884	1251.33		533.884	4823	997.466	1863.35	3217.09	1692.09	997.466	4777.6		400.884	894.667		345.884	588	589.56	590.487	589.56	589.56	589.56	590.487		290.884	631	386.69	386.69	387.737	432.732	540.278	403.829
1071.08	44099.4		1300.78	2439.33	2424.93	2422.77	2424.93		1080.78	1593.38	1594.07	1593.5	1593.5	1593.5	1593.5	1594.07		800.784	1277.33		533.784	4997	996.007	1999.79	3431.33	1594.52	996.007	5033.62		400.784	859.333		345.784	575.333	589.522	590.097	589.522	589.522	589.522	590.098		290.784	606	385.938	385.938	387.535	444.503	527.781	400.034
1070.08	43496.4		1300.68	2431.33	2424.71	2422.7	2424.71		1080.68	1571	1594.13	1593.55	1593.55	1593.55	1593.55	1594.14		800.684	1272.67		533.684	5213	994.469	2144.18	3628.96	1504.39	994.469	5288.6		400.684	878.667		345.684	592	589.515	589.868	589.515	589.515	589.515	589.869		290.684	607	385.181	385.181	387.57	458.206	512.589	396.7
1069.08	42873.3		1300.58	2489.33	2424.04	2422.16	2424.04		1080.58	1594.75	1594.16	1593.55	1593.55	1593.55	1593.55	1594.16		800.584	1304		533.584	5448	992.844	2293.12	3802.11	1422.85	992.844	5532.39		400.584	886.667		345.584	588	588	588.213	588	588	588	588.213		290.584	590.667	384.478	384.478	387.993	473.54	495.862	393.845
1068.08	42863.2		1300.48	2426	2423.89	2422.13	2423.89		1080.48	1586.25	1594.2	1593.56	1593.56	1593.57	1593.56	1594.2		800.484	1236		533.484	5603.5	991.162	2442.44	3943.38	1350.41	991.162	5753.91		400.484	878.667		345.484	587.333	587.333	587.461	587.333	587.333	587.333	587.461		290.484	605	383.722	383.722	388.818	489.781	478.586	391.315
1067.08	43456.2		1300.38	2418.67	2423.75	2422.1	2423.75		1080.38	1609.5	1594.26	1593.6	1593.6	1593.6	1593.6	1594.26		800.384	1240.67		533.384	5817	989.402	2587.26	4046.42	1287.1	989.402	5941.97		400.384	886		345.384	580.667	580.667	580.742	580.667	580.667	580.667	580.742		290.384	619.667	382.914	382.914	390.166	506.036	461.728	389.061
1066.08	42782.8		1300.28	2399.33	2423.47	2421.92	2423.47		1080.28	1589	1594.3	1593.61	1593.61	1593.61	1593.61	1594.3		800.284	1252.67		533.284	5940	987.596	2722.3	4106.42	1232.6	987.596	6086.14		400.284	844		345.284	594	594	594.044	594	594	594	594.044		290.284	585.667	382.22	382.22	392.349	521.405	446.195	387.2
1065.08	42712.5		1300.18	2386	2423.09	2421.64	2423.09		1080.18	1591.62	1594.33	1593.61	1593.61	1593.61	1593.61	1594.34		800.184	1252.67		533.184	6049	985.749	2842.24	4120.5	1186.31	985.749	6177.56		400.184	854		345.184	556.667	556.667	556.692	556.667	556.667	556.667	556.692		290.184	602.667	381.465	381.465	395.372	534.543	432.31	385.512
1064.08	43255.2		1300.08	2428.67	2422.95	2421.58	2422.95		1080.08	1587.88	1594.38	1593.62	1593.62	1593.62	1593.62	1594.38		800.084	1297.33		533.084	6139	983.87	2942.01	4087.9	1147.43	983.87	6209.6		400.084	865.333		345.084	575.333	575.333	575.347	575.333	575.333	575.333	575.347		290.084	613.333	380.671	380.671	399.428	544.361	420.341	383.974
1063.08	42843.1		1299.98	2364.67	2422.41	2421.12	2422.41		1079.98	1601.12	1594.42	1593.64	1593.64	1593.64	1593.64	1594.43		799.984	1275.33		532.984	6075.5	982.012	3017.19	4010.13	1115.12	982.012	6178.41		399.984	862.667											289.984	626.667	379.828	379.828	404.637	549.957	410.299	382.541
1062.08	43154.7		1299.88	2445.33	2422.15	2420.93	2422.15		1079.88	1576.25	1594.5	1593.67	1593.67	1593.67	1593.67	1594.5		799.884	1259.33		532.884	6064	980.158	3064.24	3890.7	1088.46	980.158	6083.09		399.884	884											289.884	606.667	379.051	379.051	411.216	550.862	402.178	381.295
1061.08	44169.7		1299.78	2390.67	2421.84	2420.69	2421.84		1079.78	1587.88	1594.55	1593.68	1593.68	1593.69	1593.68	1594.55		799.784	1210.67		532.784	5973.5	978.337	3080.91	3734.89	1066.6	978.337	5925.73		399.784	890											289.784	639	378.161	378.161	419.053	546.724	395.586	380.032
1060.08	44380.8		1299.68	2328	2421.04	2419.95	2421.04		1079.68	1585.12	1594.61	1593.7	1593.7	1593.7	1593.7	1594.61		799.684	1214.67		532.684	5817.5	976.571	3066.34	3549.59	1048.74	976.571	5711.52		399.684	875.333											289.684	637	377.274	377.275	428.167	537.987	390.362	378.849
1059.08	44240.1		1299.58	2464.67	2420.62	2419.59	2420.62		1079.58	1593.62	1594.65	1593.7	1593.7	1593.7	1593.7	1594.65		799.584	1194.67		532.584	5604	974.883	3021.15	3342.53	1034.2	974.883	5448.11		399.584	903.333											289.584	629.333	376.411	376.413	438.342	525.356	386.256	377.749
1058.08	43818		1299.48	2454	2420.28	2419.31	2420.28		1079.48	1576.5	1594.73	1593.74	1593.74	1593.74	1593.74	1594.74		799.484	1223.33		532.484	5349.5	973.287	2947.41	3121.69	1022.36	973.287	5144.88		399.484	858.667											289.484	664.333	375.425	375.429	449.053	509.647	382.884	376.571
1057.08	42340.6		1299.38	2349.33	2419.68	2418.75	2419.68		1079.38	1579.88	1594.81	1593.77	1593.77	1593.77	1593.77	1594.82		799.384	1265.33		532.384	5041.5	971.803	2848.38	2894.9	1012.69	971.803	4812.37		399.384	893.333											289.384	648	374.491	374.499	459.908	492.208	380.202	375.482
1056.08	43375.8		1299.28	2410	2419.56	2418.68	2419.56		1079.28	1583.38	1594.89	1593.79	1593.79	1593.79	1593.79	1594.89		799.284	1320.67		532.284	4637	970.466	2728.44	2669.36	1004.82	970.466	4461.68		399.284	876.667											289.284	691	373.408	373.423	469.971	473.973	377.84	374.27
1055.08	44089.3		1299.18	2438	2419.36	2418.52	2419.36		1079.18	1591.12	1594.95	1593.79	1593.79	1593.79	1593.79	1594.96		799.184	1289.33		532.184	4283.5	969.257	2592.66	2451.22	998.363	969.257	4103.73		399.184	876											289.184	673	372.381	372.41	478.662	456.174	375.877	373.139
1054.08	43747.6		1299.08	2419.33	2419.31	2418.52	2419.31		1079.08	1594.12	1595.02	1593.79	1593.79	1593.79	1593.79	1595.02		799.084	1286.67		532.084	3804	968.223	2446.42	2245.52	993.096	968.223	3748.59		399.084	852.667											289.084	698.333	371.265	371.319	485.041	439.469	374.069	371.935
1053.08	44330.5		1298.98	2438	2419.12	2418.36	2419.12		1078.98	1571.38	1595.13	1593.84	1593.84	1593.84	1593.84	1595.14		798.984	1303.33		531.984	3445	967.32	2294.97	2055.87	988.755	967.32	3404.95		398.984	873.333											288.984	738	370.009	370.107	488.294	424.344	372.294	370.605
1052.08	44089.3		1298.88	2388	2418.84	2418.12	2418.84		1078.88	1573	1595.25	1593.88	1593.88	1593.88	1593.88	1595.26		798.884	1281.33		531.884	3027	966.568	2143.25	1884.67	985.192	966.568	3079.97		398.884	850.667											288.884	784	368.591	368.767	488.053	411.068	370.482	369.124
1051.08	44069.2		1298.78	2416.67	2418.8	2418.11	2418.8		1078.78	1588.25	1595.34	1593.89	1593.89	1593.89	1593.89	1595.35		798.784	1250.67		531.784	2643	965.957	1995.59	1733.14	982.261	965.957	2779.08		398.784	900											288.784	822	367.038	367.349	484.234	399.725	368.625	367.517
1050.08	44923.5		1298.68	2380	2418.46	2417.8	2418.46		1078.68	1590.62	1595.44	1593.9	1593.9	1593.9	1593.9	1595.44		798.684	1276		531.684	2375.5	965.443	1855.49	1601.31	979.82	965.443	2505.73		398.684	864.667											288.684	883.667	365.269	365.808	476.933	390.11	366.617	365.702
1049.08	45084.3		1298.58	2412.67	2418.39	2417.76	2418.39		1078.58	1592.25	1595.54	1593.9	1593.9	1593.9	1593.9	1595.54		798.584	1234		531.584	2094.5	965.031	1725.64	1488.44	977.793	965.031	2261.82		398.584	877.333											288.584	937.333	363.31	364.231	466.683	382.032	364.468	363.702
1048.08	45526.5		1298.48	2417.33	2418.36	2417.76	2418.36		1078.48	1612.62	1595.68	1593.94	1593.94	1593.94	1593.94	1595.68		798.484	1227.33		531.484	1840	964.712	1607.84	1393.23	976.106	964.712	2047.75		398.484	912											288.484	1022	361.054	362.604	454.168	375.12	362.058	361.411
1047.08	45295.3		1298.38	2352	2352.58	2352	2352.58		1078.38	1594	1595.8	1593.94	1593.94	1593.94	1593.94	1595.8		798.384	1272.67		531.384	1661.5	964.457	1503.06	1313.95	974.684	964.457	1862.78		398.384	886											288.384	1092.67	358.548	361.107	440.226	369.127	359.425	358.874
1046.08	44652.1		1298.28	2463.33	2463.88	2463.33	2463.88		1078.28	1592.38	1595.92	1593.94	1593.94	1593.95	1593.94	1595.93		798.284	1304		531.284	1529.5	964.251	1411.52	1248.7	973.474	964.251	1705.19		398.284	864.667											288.284	1132	355.899	360.045	425.743	363.901	356.671	356.198
1045.08	45295.3		1298.18	2480	2480.53	2480	2480.53		1078.18	1602.38	1596.08	1593.96	1593.96	1593.96	1593.96	1596.09		798.184	1308		531.184	1377	964.101	1332.86	1195.55	972.452	964.101	1572.65		398.184	842											288.184	1179	353.08	359.714	411.386	359.199	353.763	353.354
1044.08	44089.3		1298.08	2396	2396.51	2396	2396.51		1078.08	1604.25	1596.26	1593.98	1593.98	1593.98	1593.98	1596.26		798.084	1295.33		531.084	1332	963.966	1266.23	1152.57	971.559	963.966	1462.43		398.084	840											288.084	1225.67	350.092	360.521	397.656	354.833	350.699	350.344
1043.08	43948.6		1297.98	2451.33	2451.82	2451.33	2451.82		1077.98	1585.38	1596.44	1594	1594	1594	1594	1596.45		797.984	1317.33		530.984	1252	963.861	1210.58	1118.07	970.787	963.861	1371.71		397.984	872											287.984	1212.33	347.139	363.234	385.087	350.87	347.682	347.372
1042.08	44772.7		1297.88	2393.33	2393.8	2393.33	2393.8		1077.88	1582.62	1596.66	1594.02	1594.02	1594.03	1594.02	1596.66		797.884	1302.67		530.884	1167	963.787	1164.66	1090.49	970.125	963.787	1297.7		397.884	896											287.884	1184.33	344.272	368.671	373.939	347.258	344.76	344.487
1041.08	44963.7		1297.78	2452	2452.45	2452	2452.45		1077.78	1595.25	1596.87	1594.03	1594.03	1594.03	1594.03	1596.88		797.784	1306.67		530.784	1120	963.73	1127.16	1068.52	969.547	963.73	1237.76		397.784	860											287.784	1155.33	341.495	377.992	364.228	343.923	341.934	341.693
1040.08	44792.8		1297.68	2436	2436.43	2436	2436.43		1077.68	1598.12	1597.12	1594.03	1594.03	1594.04	1594.03	1597.13		797.684	1302.67		530.684	1081	963.688	1096.79	1051	969.041	963.688	1189.45		397.684	862											287.684	1107.33	338.874	392.468	355.95	340.877	339.269	339.056
1039.08	45074.2		1297.58	2422	2422.41	2422	2422.41		1077.58	1613	1597.43	1594.07	1594.07	1594.07	1594.07	1597.44		797.584	1271.33		530.584	1120	963.63	1072.35	1036.96	968.57	963.63	1150.63		397.584	871.333											287.584	1045.67	336.456	413.727	349.033	338.131	336.812	336.623
1038.08	44421		1297.48	2428.67	2429.06	2428.67	2429.06		1077.48	1598	1597.75	1594.08	1594.08	1594.08	1594.08	1597.75		797.484	1244		530.484	1042.5	963.602	1052.81	1025.72	968.17	963.602	1119.5		397.484	895.333											287.484	1016.67	334.132	443.631	343.241	335.547	334.45	334.281
1037.08	44189.8		1297.38	2444.67	2445.05	2444.67	2445.05		1077.38	1607.5	1598.12	1594.11	1594.11	1594.11	1594.11	1598.13		797.384	1320.67		530.384	1037	963.575	1037.22	1016.65	967.809	963.575	1094.54		397.384	872.667											287.384	995.667	331.877	484.564	338.345	333.079	332.156	332.005
1036.08	44410.9		1297.28	2353.33	2353.7	2353.33	2353.7		1077.28	1609.38	1598.56	1594.14	1594.14	1594.14	1594.14	1598.56		797.284	1284.67		530.284	1037.5	963.548	1024.79	1009.28	967.481	963.548	1074.46		397.284	874											287.284	976.667	329.686	538.593	334.18	330.706	329.923	329.787
1035.08	45375.7		1297.18	2404	2404.36	2404	2404.36		1077.18	1598.75	1599.02	1594.15	1594.15	1594.15	1594.15	1599.03		797.184	1248		530.184	999.5	963.535	1014.87	1003.26	967.195	963.535	1058.26		397.184	870.667											287.184	975.667	327.505	607.919	330.545	328.359	327.688	327.566
1034.08	45415.9		1297.08	2408.67	2409.01	2408.67	2409.01		1077.08	1597.62	1599.56	1594.15	1594.15	1594.16	1594.15	1599.56		797.084	1295.33		530.084	999.5	963.522	1006.92	998.297	966.934	963.522	1045.1		397.084	844.667											287.084	995.333	325.27	694.782	327.25	325.959	325.38	325.27
1033.08	45978.7		1296.98	2412	2412.33	2412	2412.33		1076.98	1632.88	1600.25	1594.23	1594.23	1594.24	1594.23	1600.25		796.984	1264.67		529.984	975.5	963.517	1000.51	994.176	966.704	963.517	1034.36		396.984	885.333											286.984	1051.33	322.871	800.46	324.056	323.378	322.875	322.775
1032.08	45134.5		1296.88	2416	2416.32	2416	2416.32		1076.88	1597	1600.96	1594.24	1594.24	1594.24	1594.24	1600.97		796.884	1238.67		529.884	962	963.517	995.329	990.725	966.498	963.517	1025.52		396.884	855.333											286.884	1119.33	320.287	924.747	320.841	320.57	320.13	320.04
1031.08	45516.4		1296.78	2396	2396.31	2396	2396.31		1076.78	1608.25	1601.82	1594.27	1594.27	1594.27	1594.27	1601.82		796.784	1299.33		529.784	961.5	963.516	991.095	987.806	966.309	963.516	1018.18		396.784	864.667											286.784	1183.33	317.562	1066.25	317.558	317.545	317.159	317.077
1030.08	45737.5		1296.68	2414.67	2414.96	2414.67	2414.96		1076.68	1616.62	1602.82	1594.31	1594.31	1594.32	1594.31	1602.83		796.684	1272		529.684	996	963.504	987.6	985.303	966.125	963.504	1012.02		396.684	875.333											286.684	1311.67	314.525	1221.53	313.936	314.08	313.739	313.664
1029.08	46169.7		1296.58	2454.67	2454.95	2454.67	2454.95		1076.58	1608.38	1603.97	1594.34	1594.34	1594.34	1594.34	1603.97		796.584	1278		529.584	970	963.502	984.708	983.157	965.964	963.502	1006.83		396.584	897.333											286.584	1440.67	311.241	1384.2	309.936	310.169	309.867	309.798
1028.08	46018.9		1296.48	2457.33	2457.61	2457.33	2457.61		1076.48	1609	1605.31	1594.37	1594.37	1594.37	1594.37	1605.31		796.484	1295.33		529.484	958.5	963.5	982.289	981.298	965.816	963.5	1002.4		396.484	844											286.484	1580	307.769	1545.77	305.495	305.775	305.505	305.443
1027.08	46531.5		1296.38	2415.33	2415.61	2415.33	2415.61		1076.38	1616.88	1606.87	1594.42	1594.42	1594.42	1594.42	1606.87		796.384	1300.67		529.384	963.5	963.5	980.25	979.678	965.682	963.5	998.61		396.384	863.333											286.384	1710	304.269	1696.06	300.629	300.925	300.685	300.627
1026.08	47546.5		1296.28	2376	2376.27	2376	2376.27		1076.28	1611.12	1608.67	1594.45	1594.45	1594.45	1594.45	1608.67		796.284	1252.67		529.284	900.5	900.5	915.513	915.256	902.558	900.5	932.328		396.284	878											286.284	1826	300.991	1822.77	295.37	295.667	295.451	295.399
1025.08	47858.1		1296.18	2410.67	2410.92	2410.67	2410.92		1076.18	1610.75	1610.74	1594.48	1594.48	1594.49	1594.48	1610.74		796.184	1262		529.184	938.5	938.5	952.022	952.003	940.444	938.5	967.469		396.184	856.667											286.184	1964	298.09	1915.2	289.634	289.922	289.728	289.679
1024.08	48270.1		1296.08	2392	2392.25	2392	2392.25		1076.08	1624.25	1613.16	1594.55	1594.55	1594.55	1594.55	1613.16		796.084	1270.67		529.084	947	947	959.232	959.393	948.837	947	973.462		396.084	869.333											286.084	2006.67	296.188	1965.02	283.741	284.015	283.839	283.795
1023.08	48330.4		1295.98	2430	2430.24	2430	2430.24		1075.98	1614.88	1615.91	1594.59	1594.59	1594.59	1594.59	1615.91		795.984	1285.33											395.984	881.333											285.984	2047	295.667	1966.73	277.695	277.952	277.793	277.752
1022.08	47275.2		1295.88	2434	2434.23	2434	2434.23		1075.88	1629.75	1619.07	1594.66	1594.66	1594.66	1594.66	1619.08		795.884	1284.67											395.884	906											285.884	1989.67	297.387	1918.61	271.827	272.068	271.924	271.886
1021.08	47918.4		1295.78	2429.33	2429.55	2429.33	2429.55		1075.78	1650.5	1622.69	1594.77	1594.77	1594.77	1594.77	1622.7		795.784	1284.67											395.784	840											285.784	1898.33	301.924	1826.42	266.254	266.478	266.35	266.312
1020.08	46471.2		1295.68	2389.33	2389.55	2389.33	2389.55		1075.68	1638.75	1626.73	1594.86	1594.86	1594.86	1594.86	1626.74		795.684	1283.33											395.684	844											285.684	1752	310.01	1698.25	261.164	261.373	261.255	261.221
1019.08	48471.1		1295.58	2348.67	2348.88	2348.67	2348.88		1075.58	1649.88	1631.26	1594.97	1594.97	1594.98	1594.97	1631.26		795.584	1286.67											395.584	866											285.584	1584.67	322.303	1544.34	256.631	256.825	256.716	256.685
1018.08	48491.2		1295.48	2379.33	2379.54	2379.33	2379.54		1075.48	1634.75	1636.22	1595.05	1595.05	1595.06	1595.05	1636.22		795.484	1300											395.484	906.667											285.484	1456	339.247	1376.29	252.523	252.703	252.603	252.575
1017.08	47456.1		1295.38	2466.67	2466.86	2466.67	2466.86		1075.38	1642.75	1641.67	1595.15	1595.15	1595.15	1595.15	1641.67		795.384	1288.67											395.384	874.667											285.384	1291.33	361.192	1205.44	248.965	249.133	249.042	249.015
1016.08	46802.8		1295.28	2427.33	2427.53	2427.33	2427.53		1075.28	1637.88	1647.56	1595.24	1595.24	1595.24	1595.24	1647.56		795.284	1292											395.284	874											285.284	1180.67	388.023	1040.49	245.774	245.93	245.847	245.822
1015.08	46400.8		1295.18	2394.67	2394.85	2394.67	2394.85		1075.18	1647.75	1653.89	1595.35	1595.34	1595.35	1595.34	1653.89		795.184	1336											395.184	888.667											285.184	1052.33	419.567	888.522	243.011	243.158	243.081	243.057
1014.08	46521.4		1295.08	2423.33	2423.51	2423.33	2423.51		1075.08	1670.12	1660.63	1595.5	1595.5	1595.5	1595.5	1660.63		795.084	1292											395.084	920.667											285.084	971.667	454.829	753.723	240.516	240.653	240.582	240.561
1013.08	47134.5		1294.98	2378.67	2378.84	2378.67	2378.84		1074.98	1662.5	1667.64	1595.63	1595.63	1595.64	1595.63	1667.65		794.984	1222.67											394.984	858											284.984	900.333	492.316	637.791	238.256	238.384	238.319	238.299
1012.08	47355.6		1294.88	2422.67	2422.84	2422.67	2422.84		1074.88	1677.5	1674.89	1595.8	1595.8	1595.8	1595.8	1674.89		794.884	1271.33											394.884	843.333											284.884	844.333	530.044	540.911	236.18	236.3	236.239	236.221
1011.08	47255.1		1294.78	2352	2352.16	2352	2352.16		1074.78	1679.62	1682.23	1595.97	1595.97	1595.97	1595.97	1682.23		794.784	1282.67											394.784	866											284.784	819.667	565.373	462.417	234.182	234.295	234.238	234.221
1010.08	47235		1294.68	2418.67	2418.83	2418.67	2418.83		1074.68	1676.75	1689.52	1596.13	1596.13	1596.14	1596.13	1689.53		794.684	1256											394.684	876.667											284.684	776.667	595.578	400.117	232.324	232.43	232.377	232.361
1009.08	47436		1294.58	2391.33	2391.49	2391.33	2391.49		1074.58	1709.25	1696.71	1596.37	1596.36	1596.37	1596.36	1696.71		794.584	1290											394.584	906											284.584	772	617.953	351.523	230.476	230.579	230.527	230.511
1008.08	47747.5		1294.48	2394.67	2394.82	2394.67	2394.82		1074.48	1689	1703.53	1596.55	1596.55	1596.56	1596.55	1703.53		794.484	1328											394.484	890											284.484	709.667	630.54	314.529	228.834	228.931	228.883	228.869
1007.08	49466.1		1294.38	2358	2358.15	2358	2358.15		1074.38	1699.5	1709.88	1596.76	1596.76	1596.77	1596.76	1709.88		794.384	1271.33											394.384	872											284.384	712	631.379	286.958	227.179	227.27	227.226	227.213
1006.08	49988.7		1294.28	2334	2334.14	2334	2334.14		1074.28	1707.12	1715.62	1596.99	1596.99	1596.99	1596.99	1715.62		794.284	1274											394.284	872											284.284	649	620.76	266.685	225.735	225.819	225.779	225.767
1005.08	50511.3		1294.18	2396.67	2396.81	2396.67	2396.81		1074.18	1700.12	1720.57	1597.2	1597.2	1597.2	1597.2	1720.57		794.184	1284.67											394.184	895.333											284.184	594.667	599.584	252.013	224.471	224.552	224.514	224.502
1004.08	51536.4		1294.08	2349.33	2349.47	2349.33	2349.47		1074.08	1723.5	1724.66	1597.45	1597.45	1597.46	1597.45	1724.67		794.084	1286											394.084	882.667											284.084	581.667	569.492	241.452	223.248	223.325	223.288	223.278
1003.08	49606.8								1073.98	1734.5	1727.78	1597.73	1597.73	1597.73	1597.73	1727.79		793.984	1316																							283.984	532.667	532.991	234.055	222.188	222.261	222.227	222.217
1002.08	50169.6								1073.88	1717.25	1729.78	1597.97	1597.97	1597.98	1597.97	1729.78		793.884	1254.67																							283.884	494	493.035	228.853	221.257	221.327	221.294	221.285
1001.08	50250								1073.78	1736.62	1730.67	1598.26	1598.26	1598.26	1598.26	1730.68		793.784	1274.67																							283.784	436.333	452.252	225.293	220.521	220.586	220.556	220.547
1000.08	49858								1073.68	1726.12	1730.39	1598.52	1598.52	1598.52	1598.52	1730.4		793.684	1273.33																							283.684	409	412.751	222.827	219.875	219.937	219.909	219.9
999.084	49355.5								1073.58	1739.62	1728.99	1598.8	1598.8	1598.81	1598.8	1729		793.584	1262																							283.584	381.333	376.276	221.122	219.322	219.38	219.355	219.347
998.084	49446								1073.48	1712.75	1726.45	1599.04	1599.04	1599.04	1599.04	1726.45		793.484	1311.33																							283.484	357.333	343.807	219.926	218.85	218.905	218.881	218.873
997.084	48290.2								1073.38	1721.62	1722.91	1599.29	1599.29	1599.29	1599.28	1722.92		793.384	1308.67																							283.384	339.333	315.83	219.069	218.437	218.49	218.467	218.46
996.084	47003.8								1073.28	1731.38	1718.49	1599.55	1599.55	1599.56	1599.55	1718.49		793.284	1292.67																							283.284	313.667	292.548	218.477	218.111	218.162	218.139	218.133
995.084	46511.4								1073.18	1736.25	1713.3	1599.83	1599.83	1599.84	1599.83	1713.3		793.184	1283.33																							283.184	320.333	273.596	217.969	217.761	217.81	217.788	217.782
994.084	46822.9								1073.08	1719.75	1707.43	1600.08	1600.08	1600.08	1600.08	1707.43		793.084	1229.33																							283.084	277	258.64	217.674	217.558	217.604	217.584	217.578
993.084	46059.1								1072.98	1712.62	1701.06	1600.31	1600.3	1600.31	1600.3	1701.06		792.984	1279.33																							282.984	277	247.011	217.418	217.354	217.398	217.38	217.374
992.084	45516.4								1072.88	1699.38	1694.32	1600.51	1600.51	1600.51	1600.51	1694.33		792.884	1286																							282.884	278	238.211	217.181	217.146	217.188	217.171	217.166
991.084	44179.8								1072.78	1699.75	1687.39	1600.71	1600.71	1600.71	1600.71	1687.4		792.784	1276																							282.784	266.667	231.679	216.995	216.977	217.017	217.001	216.995
990.084	43134.6								1072.68	1687.88	1680.4	1600.88	1600.88	1600.89	1600.88	1680.41		792.684	1265.33																							282.684	262	226.898	216.832	216.823	216.861	216.845	216.84
989.084	42662.2								1072.58	1670	1673.45	1601.03	1601.03	1601.03	1601.03	1673.46		792.584	1310.67																							282.584	234.333	223.54	216.768	216.763	216.8	216.785	216.78
988.084	42752.7								1072.48	1682.38	1666.73	1601.19	1601.19	1601.19	1601.19	1666.73		792.484	1308.67																							282.484	240.333	221.181	216.684	216.682	216.718	216.703	216.699
987.084	42571.8								1072.38	1666.38	1660.25	1601.32	1601.32	1601.33	1601.32	1660.26		792.384	1268																							282.384	240.333	219.534	216.602	216.601	216.635	216.622	216.617
986.084	43556.7								1072.28	1650.25	1654.11	1601.42	1601.42	1601.43	1601.42	1654.11		792.284	1274																							282.284	235.667	218.413	216.536	216.536	216.568	216.556	216.552
985.084	43978.8								1072.18	1639.88	1648.35	1601.5	1601.5	1601.51	1601.5	1648.36		792.184	1284.67																							282.184	233.333	217.659	216.478	216.478	216.509	216.497	216.494
984.084	46079.2								1072.08	1636.75	1643.04	1601.57	1601.57	1601.58	1601.57	1643.05		792.084	1300																							282.084	227.333	217.174	216.441	216.441	216.471	216.459	216.456
983.084	47023.9								1071.98	1636	1638.2	1601.64	1601.64	1601.65	1601.64	1638.21		791.984	1274																							281.984	231.667	216.836	216.389	216.389	216.418	216.407	216.403
982.084	49636.9								1071.88	1603.5	1633.77	1601.65	1601.65	1601.65	1601.65	1633.78		791.884	1279.33																							281.884	220	216.644	216.376	216.376	216.404	216.394	216.39
981.084	49687.2								1071.78	1607.62	1629.81	1601.66	1601.66	1601.66	1601.66	1629.81		791.784	1252.67																							281.784	218.333	216.527	216.37	216.37	216.397	216.387	216.383
980.084	49064.1								1071.68	1613.88	1626.3	1601.68	1601.68	1601.69	1601.68	1626.3		791.684	1272.67																							281.684	220.667	216.446	216.355	216.355	216.381	216.371	216.368
979.084	47275.2								1071.58	1587.25	1623.21	1601.71	1601.71	1601.72	1601.71	1623.22		791.584	1276																							281.584	222.667	216.385	216.333	216.333	216.358	216.349	216.346
978.084	46079.2								1071.48	1595.88	1620.49	1601.72	1601.72	1601.73	1601.72	1620.5		791.484	1262																							281.484	216.333	216.362	216.333	216.333	216.357	216.349	216.346
977.084	45335.5								1071.38	1617.5	1618.14	1601.76	1601.76	1601.76	1601.76	1618.15		791.384	1252.67																							281.384	218.333	218.349	218.333	218.333	218.356	218.348	218.345
976.084	43245.1								1071.28	1620.88	1616.12	1601.8	1601.8	1601.8	1601.8	1616.13		791.284	1293.33																							281.284	219.667	219.675	219.667	219.667	219.689	219.681	219.679
975.084	42571.8								1071.18	1609.25	1614.36	1601.81	1601.81	1601.82	1601.81	1614.37		791.184	1320																							281.184	228	228.005	228	228	228.022	228.014	228.012
974.084	42139.6								1071.08	1615.62	1612.86	1601.84	1601.84	1601.84	1601.84	1612.86		791.084	1297.33																							281.084	214.333	214.336	214.333	214.333	214.354	214.347	214.345
973.084	42220								1070.98	1612.62	1611.56	1601.86	1601.86	1601.87	1601.86	1611.57		790.984	1282
972.084	40300.5								1070.88	1596.38	1610.44	1601.87	1601.87	1601.88	1601.87	1610.45		790.884	1290
971.084	38340.8								1070.78	1607.38	1609.49	1601.88	1601.88	1601.89	1601.88	1609.49		790.784	1297.33
970.084	36491.6								1070.68	1592.75	1608.67	1601.9	1601.9	1601.91	1601.9	1608.68		790.684	1296.67
969.084	35164.9								1070.58	1574.12	1608.01	1601.96	1601.96	1601.96	1601.96	1608.02		790.584	1281.33
968.084	33637.3								1070.48	1577.12	1607.45	1602.01	1602.01	1602.01	1602.01	1607.45		790.484	1296
967.084	32150								1070.38	1609.62	1606.93	1602.03	1602.03	1602.03	1602.02	1606.94		790.384	1274
966.084	31969								1070.28	1595.38	1606.48	1602.04	1602.04	1602.04	1602.04	1606.49		790.284	1258.67
965.084	32139.9								1070.18	1615.62	1606.11	1602.07	1602.07	1602.07	1602.07	1606.11		790.184	1283.33
964.084	31677.6								1070.08	1589	1605.78	1602.09	1602.09	1602.1	1602.09	1605.79		790.084	1277.33
963.084	32099.7								1069.98	1609.12	1605.48	1602.11	1602.11	1602.11	1602.11	1605.49		789.984	1264
962.084	31828.3								1069.88	1610.25	1605.23	1602.12	1602.12	1602.13	1602.12	1605.24		789.884	1264.67
961.084	32039.4								1069.78	1610.12	1605	1602.14	1602.14	1602.14	1602.14	1605.01		789.784	1295.33
960.084	31677.6								1069.68	1600.62	1604.79	1602.14	1602.14	1602.15	1602.14	1604.8		789.684	1292
959.084	31034.4								1069.58	1574.25	1604.66	1602.2	1602.2	1602.21	1602.2	1604.66		789.584	1296
958.084	31426.3								1069.48	1588.62	1604.51	1602.23	1602.23	1602.23	1602.23	1604.52		789.484	1305.33
957.084	31607.2								1069.38	1607	1609.13	1607	1607	1607.01	1607	1609.14		789.384	1242.67
956.084	32089.7								1069.28	1612.25	1614.24	1612.25	1612.25	1612.26	1612.25	1614.25		789.284	1252.67
955.084	32411.2								1069.18	1601	1602.86	1601	1601	1601.01	1601	1602.87		789.184	1292.67
954.084	31657.5								1069.08	1611.75	1613.5	1611.75	1611.75	1611.76	1611.75	1613.51		789.084	1296.67
953.084	30310.8								1068.98	1599.5	1601.14	1599.5	1599.5	1599.51	1599.5	1601.15		788.984	1273.33
952.084	30381.2								1068.88	1596.25	1597.8	1596.25	1596.25	1596.26	1596.25	1597.8		788.884	1255.33
951.084	31376.1								1068.78	1609.88	1611.33	1609.88	1609.88	1609.88	1609.88	1611.34		788.784	1284.67
950.084	31898.7								1068.68	1586	1587.38	1586	1586	1586.01	1586	1587.38		788.684	1309.33
949.084	31516.8								1068.58	1606.75	1608.05	1606.75	1606.75	1606.76	1606.75	1608.06		788.584	1251.33
948.084	31717.8								1068.48	1576.88	1578.11	1576.88	1576.88	1576.88	1576.88	1578.12		788.484	1282
947.084	31838.4								1068.38	1595.62	1596.79	1595.63	1595.63	1595.63	1595.62	1596.8		788.384	1305.33
946.084	32732.8								1068.28	1615.75	1616.86	1615.75	1615.75	1615.76	1615.75	1616.87		788.284	1255.33
945.084	32270.5								1068.18	1584.5	1585.55	1584.5	1584.5	1584.51	1584.5	1585.56		788.184	1300.67
944.084	32250.5								1068.08	1590.88	1591.88	1590.88	1590.88	1590.88	1590.88	1591.89		788.084	1309.33
943.084	31768								1067.98	1586.75	1587.7	1586.75	1586.75	1586.76	1586.75	1587.71		787.984	1287.33
942.084	32552								1067.88	1616	1616.91	1616	1616	1616.01	1616	1616.92		787.884	1287.33
941.084	32260.5								1067.78	1623.62	1624.49	1623.63	1623.63	1623.63	1623.62	1624.5		787.784	1303.33
940.084	32069.5								1067.68	1581	1581.83	1581	1581	1581.01	1581	1581.84		787.684	1291.33
939.084	32160								1067.58	1590	1590.79	1590	1590	1590.01	1590	1590.8		787.584	1291.33
938.084	32491.7								1067.48	1597.75	1598.51	1597.75	1597.75	1597.76	1597.75	1598.52		787.484	1266
937.084	32732.8								1067.38	1598.25	1598.97	1598.25	1598.25	1598.26	1598.25	1598.98		787.384	1329.33
936.084	32361								1067.28	1607.12	1607.82	1607.13	1607.13	1607.13	1607.12	1607.83		787.284	1272
935.084	32089.7								1067.18	1597.62	1598.29	1597.63	1597.63	1597.63	1597.62	1598.3		787.184	1256.67
934.084	32481.6								1067.08	1620	1620.64	1620	1620	1620.01	1620	1620.65		787.084	1273.33
933.084	31868.5								1066.98	1605.62	1606.24	1605.63	1605.63	1605.63	1605.62	1606.25		786.984	1289.33
932.084	31536.9								1066.88	1597.38	1597.96	1597.38	1597.38	1597.38	1597.38	1597.97		786.884	1280.67
931.084	31667.5								1066.78	1575.12	1575.69	1575.13	1575.13	1575.13	1575.12	1575.7		786.784	1288
930.084	31104.8								1066.68	1592.12	1592.67	1592.13	1592.13	1592.13	1592.12	1592.68		786.684	1293.33
929.084	31878.6								1066.58	1589.75	1590.27	1589.75	1589.75	1589.76	1589.75	1590.29		786.584	1276.67
928.084	32541.9								1066.48	1588.88	1589.38	1588.88	1588.88	1588.88	1588.88	1589.39		786.484	1308.67
927.084	31838.4								1066.38	1611.38	1611.86	1611.38	1611.38	1611.38	1611.38	1611.87		786.384	1276
926.084	31567								1066.28	1598.12	1598.59	1598.13	1598.13	1598.13	1598.12	1598.61		786.284	1298.67
925.084	32361								1066.18	1594.38	1594.83	1594.38	1594.38	1594.38	1594.38	1594.84		786.184	1342.67
924.084	31426.3								1066.08	1599.38	1599.81	1599.38	1599.38	1599.38	1599.38	1599.82		786.084	1266.67
923.084	31878.6								1065.98	1615.75	1616.17	1615.75	1615.75	1615.76	1615.75	1616.18		785.984	1267.33
922.084	32139.9								1065.88	1608.62	1609.03	1608.63	1608.63	1608.63	1608.62	1609.04		785.884	1293.33
921.084	31376.1								1065.78	1629.5	1629.89	1629.5	1629.5	1629.51	1629.5	1629.91		785.784	1304.67
920.084	31687.7								1065.68	1608.88	1609.26	1608.88	1608.88	1608.88	1608.88	1609.27		785.684	1294.67
919.084	32371								1065.58	1611.88	1612.24	1611.88	1611.88	1611.88	1611.88	1612.26		785.584	1306
918.084	32511.8								1065.48	1615.75	1616.11	1615.75	1615.75	1615.76	1615.75	1616.12		785.484	1290
917.084	32421.3								1065.38	1600.38	1600.72	1600.38	1600.38	1600.38	1600.38	1600.73		785.384	1284
916.084	32220.3								1065.28	1591	1591.33	1591	1591	1591.01	1591	1591.35		785.284	1303.33
915.084	31838.4								1065.18	1605.25	1605.57	1605.25	1605.25	1605.26	1605.25	1605.59		785.184	1289.33
914.084	31416.3								1065.08	1589.38	1589.69	1589.38	1589.38	1589.39	1589.38	1589.7		785.084	1298.67
913.084	31607.2								1064.98	1607	1607.31	1607	1607	1607.01	1607	1607.32		784.984	1301.33
912.084	32129.8								1064.88	1604	1604.3	1604	1604	1604.01	1604	1604.31		784.884	1323.33
911.084	31456.5								1064.78	1604	1604.29	1604	1604	1604.01	1604	1604.3		784.784	1290.67
910.084	31999.2								1064.68	1602.75	1603.03	1602.75	1602.75	1602.76	1602.75	1603.04		784.684	1282
909.084	32300.7								1064.58	1596	1596.27	1596	1596	1596.01	1596	1596.29		784.584	1292.67
908.084	32190.2								1064.48	1589.88	1590.14	1589.88	1589.88	1589.89	1589.88	1590.15		784.484	1272
907.084	31908.8								1064.38	1614.25	1614.51	1614.25	1614.25	1614.26	1614.25	1614.52		784.384	1306.67
906.084	32541.9								1064.28	1632.25	1632.5	1632.25	1632.25	1632.26	1632.25	1632.51		784.284	1337.33
905.084	33255.4								1064.18	1593.88	1594.12	1593.88	1593.88	1593.89	1593.88	1594.14		784.184	1288.67
904.084	33677.6								1064.08	1602.12	1602.37	1602.13	1602.13	1602.14	1602.12	1602.38		784.084	1282.67
903.084	32421.3								1063.98	1624.5	1624.73	1624.5	1624.5	1624.51	1624.5	1624.75		783.984	1291.33
902.084	31416.3								1063.88	1600.75	1600.98	1600.75	1600.75	1600.76	1600.75	1600.99		783.884	1272
901.084	32089.7								1063.78	1615.88	1616.09	1615.88	1615.88	1615.89	1615.88	1616.11		783.784	1260.67
900.084	32139.9								1063.68	1620.62	1620.84	1620.63	1620.63	1620.64	1620.62	1620.85		783.684	1290
899.084	32511.8								1063.58	1598	1598.21	1598	1598	1598.01	1598	1598.22		783.584	1302
898.084	33225.3								1063.48	1604.75	1604.95	1604.75	1604.75	1604.76	1604.75	1604.97		783.484	1303.33
897.084	32763								1063.38	1592.75	1592.95	1592.75	1592.75	1592.76	1592.75	1592.96		783.384	1270
896.084	32642.4								1063.28	1619.25	1619.44	1619.25	1619.25	1619.26	1619.25	1619.46		783.284	1230.67
895.084	32220.3								1063.18	1597.75	1597.94	1597.75	1597.75	1597.77	1597.75	1597.95		783.184	1278
894.084	33185.1								1063.08	1607.75	1607.93	1607.75	1607.75	1607.77	1607.75	1607.95		783.084	1262
893.084	33617.2								1062.98	1598.25	1598.43	1598.25	1598.25	1598.27	1598.25	1598.45		782.984	1210.67
892.084	31928.8								1062.88	1602.25	1602.42	1602.25	1602.25	1602.27	1602.25	1602.44		782.884	1287.33
891.084	32974.1								1062.78	1617	1617.17	1617	1617	1617.02	1617	1617.19		782.784	1288.67
890.084	33587.1								1062.68	1605.5	1605.67	1605.5	1605.5	1605.52	1605.5	1605.68		782.684	1315.33
889.084	33195.2								1062.58	1599.75	1599.91	1599.75	1599.75	1599.77	1599.75	1599.93		782.584	1288.67
888.084	33305.7								1062.48	1613.75	1613.91	1613.75	1613.75	1613.77	1613.75	1613.93		782.484	1279.33
887.084	33094.7								1062.38	1605.12	1605.28	1605.13	1605.13	1605.14	1605.12	1605.3		782.384	1283.33
886.084	31697.7								1062.28	1611.38	1611.52	1611.38	1611.38	1611.39	1611.38	1611.54		782.284	1269.33
885.084	33185.1								1062.18	1604.25	1604.4	1604.25	1604.25	1604.27	1604.25	1604.42		782.184	1239.33
884.084	32039.4								1062.08	1604.12	1604.27	1604.13	1604.13	1604.14	1604.12	1604.29		782.084	1244
883.084	33154.9								1061.98	1617.5	1617.64	1617.5	1617.5	1617.52	1617.5	1617.66		781.984	1275.33
882.084	33486.6								1061.88	1603.25	1603.39	1603.25	1603.25	1603.27	1603.25	1603.41		781.884	1321.33
881.084	33165								1061.78	1611.88	1612.01	1611.88	1611.88	1611.89	1611.88	1612.03		781.784	1300.67
880.084	32913.8								1061.68	1610.62	1610.76	1610.63	1610.63	1610.64	1610.62	1610.78		781.684	1253.33
879.084	32933.8								1061.58	1605.12	1605.25	1605.13	1605.13	1605.14	1605.12	1605.28		781.584	1250.67
878.084	32361								1061.48	1586.38	1586.5	1586.38	1586.38	1586.39	1586.38	1586.52		781.484	1294
877.084	32521.8								1061.38	1599	1599.12	1599	1599	1599.02	1599	1599.15		781.384	1310.67
876.084	32330.8								1061.28	1610.5	1610.62	1610.5	1610.5	1610.52	1610.5	1610.64		781.284	1330
875.084	31989.2								1061.18	1597	1597.12	1597	1597	1597.02	1597	1597.14		781.184	1287.33
874.084	32803.2								1061.08	1554.75	1554.87	1554.75	1554.75	1554.77	1554.75	1554.89		781.084	1288
873.084	32552								1060.98	1600.88	1600.99	1600.88	1600.88	1600.9	1600.88	1601.01		780.984	1263.33
872.084	32582.1								1060.88	1610.88	1610.99	1610.88	1610.88	1610.9	1610.88	1611.01		780.884	1254.67
871.084	31667.5								1060.78	1624	1624.11	1624	1624	1624.02	1624	1624.13		780.784	1258
870.084	33004.2								1060.68	1612.62	1612.73	1612.63	1612.63	1612.65	1612.62	1612.76		780.684	1285.33
869.084	33074.6								1060.58	1600.25	1600.36	1600.25	1600.25	1600.27	1600.25	1600.38		780.584	1274
868.084	31798.2								1060.48	1608.38	1608.48	1608.38	1608.38	1608.4	1608.38	1608.51		780.484	1272.67
867.084	31617.3								1060.38	1602.5	1602.6	1602.5	1602.5	1602.52	1602.5	1602.63		780.384	1278
866.084	31335.9								1060.28	1585.12	1585.22	1585.13	1585.13	1585.15	1585.12	1585.25		780.284	1294
865.084	30833.4								1060.18	1604.62	1604.72	1604.63	1604.63	1604.65	1604.62	1604.75		780.184	1342
864.084	31215.3								1060.08	1619.25	1619.35	1619.25	1619.25	1619.28	1619.25	1619.37		780.084	1261.33
863.084	30341								1059.98	1608.38	1608.47	1608.38	1608.38	1608.4	1608.38	1608.5		779.984	1298.67
862.084	30129.9								1059.88	1611.75	1611.84	1611.75	1611.75	1611.78	1611.75	1611.87		779.884	1274.67
861.084	29969.1								1059.78	1614.5	1614.59	1614.5	1614.5	1614.53	1614.5	1614.62		779.784	1261.33
860.084	29808.3								1059.68	1610.5	1610.59	1610.5	1610.5	1610.53	1610.5	1610.62		779.684	1307.33
859.084	30823.3								1059.58	1630.88	1630.96	1630.88	1630.88	1630.9	1630.88	1630.99		779.584	1266.67
858.084	30481.7								1059.48	1617.5	1617.58	1617.5	1617.5	1617.53	1617.5	1617.62		779.484	1258.67
857.084	31707.8								1059.38	1620.62	1620.71	1620.63	1620.63	1620.65	1620.62	1620.74		779.384	1300.67
856.084	31959								1059.28	1602.75	1602.83	1602.75	1602.75	1602.78	1602.75	1602.87		779.284	1277.33
855.084	33074.6								1059.18	1618.12	1618.2	1618.13	1618.13	1618.16	1618.12	1618.24		779.184	1292
854.084	32843.4								1059.08	1616.88	1616.95	1616.88	1616.88	1616.91	1616.88	1616.99		779.084	1256
853.084	33637.3								1058.98	1612.5	1612.58	1612.5	1612.5	1612.53	1612.5	1612.61		778.984	1271.33
852.084	33335.8								1058.88	1627.62	1627.7	1627.63	1627.63	1627.66	1627.62	1627.74		778.884	1244
851.084	34561.9								1058.78	1607.38	1607.45	1607.38	1607.38	1607.41	1607.38	1607.49		778.784	1284
850.084	35034.3								1058.68	1615.5	1615.57	1615.5	1615.5	1615.54	1615.5	1615.61		778.684	1268
849.084	34622.2								1058.58	1623.88	1623.95	1623.88	1623.88	1623.91	1623.88	1623.99		778.584	1263.33
848.084	36451.3								1058.48	1624.25	1624.32	1624.25	1624.25	1624.29	1624.25	1624.36		778.484	1256.67
847.084	37617.2								1058.38	1612	1612.07	1612	1612	1612.04	1612	1612.11		778.384	1273.33
846.084	36682.5								1058.28	1622.38	1622.44	1622.38	1622.38	1622.41	1622.38	1622.49		778.284	1236.67
845.084	36762.9								1058.18	1626.25	1626.32	1626.25	1626.25	1626.29	1626.25	1626.36		778.184	1236.67
844.084	35858.4								1058.08	1624.38	1624.44	1624.38	1624.38	1624.42	1624.38	1624.49		778.084	1268.67
843.084	34913.7								1057.98	1596.25	1596.32	1596.25	1596.25	1596.29	1596.25	1596.36		777.984	1247.33
842.084	34923.8								1057.88	1613.62	1613.69	1613.63	1613.63	1613.67	1613.62	1613.74		777.884	1288.67
841.084	34602.2								1057.78	1634.12	1634.19	1634.13	1634.13	1634.17	1634.12	1634.24		777.784	1306.67
840.084	34672.5								1057.68	1617.5	1617.56	1617.5	1617.5	1617.55	1617.5	1617.61		777.684	1261.33
839.084	34933.8								1057.58	1591.75	1591.81	1591.75	1591.75	1591.8	1591.75	1591.86		777.584	1269.33
838.084	34240.3								1057.48	1625	1625.06	1625	1625	1625.05	1625	1625.11		777.484	1328.67
837.084	34230.3								1057.38	1631.75	1631.81	1631.75	1631.75	1631.8	1631.75	1631.86		777.384	1295.33
836.084	33536.8								1057.28	1602.88	1602.93	1602.88	1602.88	1602.92	1602.88	1602.99		777.284	1277.33
835.084	34049.4								1057.18	1616.62	1616.68	1616.63	1616.63	1616.68	1616.62	1616.74		777.184	1225.33
834.084	33657.4								1057.08	1625	1625.06	1625	1625	1625.05	1625	1625.11		777.084	1258.67
833.084	34843.3								1056.98	1641.5	1641.56	1641.5	1641.5	1641.55	1641.5	1641.61
832.084	34803.2								1056.88	1633	1633.05	1633	1633	1633.06	1633	1633.12
831.084	35355.9								1056.78	1604.88	1604.93	1604.88	1604.88	1604.93	1604.88	1604.99
830.084	34783.1								1056.68	1613	1613.05	1613	1613	1613.06	1613	1613.12
829.084	34089.6								1056.58	1641	1641.05	1641	1641	1641.06	1641	1641.12
828.084	34059.4								1056.48	1648.5	1648.55	1648.5	1648.5	1648.56	1648.5	1648.62
827.084	34963.9								1056.38	1634.75	1634.8	1634.75	1634.75	1634.81	1634.75	1634.87
826.084	34431.3								1056.28	1628.62	1628.67	1628.63	1628.63	1628.69	1628.62	1628.74
825.084	34762.9								1056.18	1642.12	1642.17	1642.13	1642.13	1642.19	1642.12	1642.25
824.084	34069.5								1056.08	1624.62	1624.67	1624.63	1624.63	1624.69	1624.62	1624.75
823.084	34099.7								1055.98	1650.62	1650.67	1650.63	1650.63	1650.7	1650.62	1650.75
822.084	34511.7								1055.88	1656.75	1656.8	1656.75	1656.75	1656.83	1656.75	1656.88
821.084	34411.2								1055.78	1622.75	1622.8	1622.75	1622.75	1622.83	1622.75	1622.88
820.084	33446.4								1055.68	1639.62	1639.67	1639.63	1639.63	1639.7	1639.62	1639.76
819.084	34381.1								1055.58	1622.88	1622.92	1622.88	1622.88	1622.96	1622.88	1623.01
818.084	34290.6								1055.48	1628.62	1628.67	1628.63	1628.63	1628.71	1628.62	1628.76
817.084	34421.2								1055.38	1627.62	1627.67	1627.63	1627.63	1627.71	1627.62	1627.76
816.084	34511.7								1055.28	1625.75	1625.79	1625.75	1625.75	1625.84	1625.75	1625.89
815.084	34682.6								1055.18	1630.25	1630.29	1630.25	1630.25	1630.34	1630.25	1630.39
814.084	34009.2								1055.08	1643.75	1643.79	1643.75	1643.75	1643.85	1643.75	1643.89
813.084	35124.8								1054.98	1661.62	1632.19	1632.16	1632.15	1632.25	1632.15	1632.3
812.084	35958.9								1054.88	1635.88	1632.23	1632.2	1632.19	1632.3	1632.19	1632.34
811.084	35446.3								1054.78	1648.5	1632.41	1632.37	1632.37	1632.48	1632.37	1632.52
810.084	34461.4								1054.68	1631.75	1632.42	1632.38	1632.38	1632.49	1632.38	1632.53
809.084	34582.1								1054.58	1600.25	1632.77	1632.74	1632.73	1632.85	1632.73	1632.89
808.084	34913.7								1054.48	1616.12	1632.95	1632.92	1632.92	1633.04	1632.92	1633.08
807.084	34833.3								1054.38	1637.12	1633	1632.96	1632.96	1633.09	1632.96	1633.13
806.084	34823.2								1054.28	1646.38	1633.14	1633.11	1633.11	1633.23	1633.11	1633.28
805.084	34843.3								1054.18	1628.75	1633.19	1633.16	1633.16	1633.29	1633.15	1633.33
804.084	34109.7								1054.08	1644.38	1633.31	1633.28	1633.28	1633.41	1633.28	1633.46
803.084	34230.3								1053.98	1632.12	1633.33	1633.29	1633.29	1633.43	1633.29	1633.47
802.084	34923.8								1053.88	1626.75	1633.4	1633.37	1633.36	1633.51	1633.36	1633.55
801.084	34863.4								1053.78	1638.88	1633.46	1633.42	1633.42	1633.58	1633.42	1633.62
800.084	34682.6								1053.68	1643.88	1633.57	1633.54	1633.54	1633.7	1633.54	1633.74
799.084	35134.8								1053.58	1626.62	1633.64	1633.62	1633.61	1633.78	1633.61	1633.82
798.084	34923.8								1053.48	1641.62	1633.73	1633.7	1633.7	1633.88	1633.7	1633.92
797.084	35386.1								1053.38	1646.38	1633.87	1633.84	1633.84	1634.02	1633.84	1634.06
796.084	35285.6								1053.28	1645.62	1634	1633.97	1633.96	1634.16	1633.96	1634.2
795.084	35657.4								1053.18	1645.5	1634.12	1634.09	1634.09	1634.29	1634.09	1634.33
794.084	35426.2								1053.08	1645.12	1634.24	1634.21	1634.21	1634.42	1634.21	1634.46
793.084	35476.5								1052.98	1648	1634.39	1634.36	1634.36	1634.58	1634.36	1634.62
792.084	35154.9								1052.88	1656.25	1634.62	1634.6	1634.6	1634.83	1634.59	1634.87
791.084	34893.6								1052.78	1627.38	1634.7	1634.68	1634.68	1634.92	1634.67	1634.96
790.084	35034.3								1052.68	1638.5	1634.75	1634.72	1634.72	1634.98	1634.72	1635.01
789.084	34149.9								1052.58	1642.75	1634.83	1634.81	1634.81	1635.08	1634.8	1635.11
788.084	35124.8								1052.48	1668.25	1635.19	1635.17	1635.17	1635.45	1635.16	1635.49
787.084	35506.7								1052.38	1654.62	1635.4	1635.38	1635.38	1635.68	1635.38	1635.72
786.084	35546.8								1052.28	1657.5	1635.64	1635.62	1635.62	1635.94	1635.62	1635.97
785.084	35968.9								1052.18	1651.25	1635.81	1635.79	1635.79	1636.13	1635.79	1636.16
784.084	35597.1								1052.08	1635.25	1635.82	1635.8	1635.79	1636.15	1635.79	1636.19
783.084	36421.2								1051.98	1666.88	1636.15	1636.13	1636.13	1636.51	1636.13	1636.55
782.084	36421.2								1051.88	1656.38	1636.37	1636.35	1636.35	1636.76	1636.35	1636.79
781.084	35918.7								1051.78	1651.25	1636.54	1636.51	1636.51	1636.94	1636.51	1636.98
780.084	36180								1051.68	1641	1636.58	1636.56	1636.56	1637.02	1636.56	1637.06
779.084	35798.1								1051.58	1636.62	1636.58	1636.56	1636.56	1637.05	1636.56	1637.09
778.084	35335.8								1051.48	1662.25	1636.86	1636.84	1636.84	1637.37	1636.84	1637.4
777.084	35727.8								1051.38	1649.38	1637	1636.98	1636.97	1637.54	1636.97	1637.58
776.084	35476.5								1051.28	1649	1637.13	1637.11	1637.11	1637.71	1637.1	1637.75
775.084	35486.6								1051.18	1649.38	1637.26	1637.24	1637.24	1637.89	1637.23	1637.93
774.084	35054.4								1051.08	1669.62	1637.61	1637.59	1637.59	1638.3	1637.59	1638.33
773.084	35144.8								1050.98	1647.12	1637.71	1637.69	1637.69	1638.46	1637.69	1638.49
772.084	35506.7								1050.88	1648	1637.83	1637.81	1637.8	1638.64	1637.8	1638.67
771.084	35486.6								1050.78	1644.38	1637.9	1637.88	1637.88	1638.79	1637.87	1638.82
770.084	36451.3								1050.68	1655.12	1638.08	1638.06	1638.06	1639.06	1638.06	1639.09
769.084	35275.5								1050.58	1665.88	1638.38	1638.37	1638.36	1639.46	1638.36	1639.49
768.084	35968.9								1050.48	1669.75	1638.72	1638.71	1638.7	1639.91	1638.7	1639.94
767.084	35376								1050.38	1652.75	1638.88	1638.86	1638.86	1640.2	1638.85	1640.23
766.084	35697.6								1050.28	1660	1639.11	1639.09	1639.09	1640.58	1639.08	1640.61
765.084	35265.4								1050.18	1658.38	1639.31	1639.3	1639.29	1640.97	1639.29	1641
764.084	34290.6								1050.08	1644	1639.37	1639.35	1639.35	1641.23	1639.34	1641.27
763.084	35597.1								1049.98	1671.12	1639.71	1639.69	1639.69	1641.83	1639.69	1641.87
762.084	35396.1								1049.88	1676.12	1640.1	1640.09	1640.08	1642.54	1640.08	1642.57
761.084	34893.6								1049.78	1657.62	1640.29	1640.28	1640.27	1643.1	1640.27	1643.13
760.084	36149.8								1049.68	1669.25	1640.61	1640.59	1640.59	1643.86	1640.59	1643.89
759.084	36451.3								1049.58	1676.25	1640.99	1640.98	1640.97	1644.79	1640.97	1644.82
758.084	36762.9								1049.48	1671	1641.32	1641.3	1641.3	1645.79	1641.3	1645.82
757.084	36973.9								1049.38	1685.5	1641.8	1641.78	1641.78	1647.07	1641.78	1647.1
756.084	35295.6								1049.28	1673	1642.13	1642.12	1642.12	1648.4	1642.11	1648.42
755.084	36441.3								1049.18	1667.25	1642.41	1642.39	1642.39	1649.86	1642.39	1649.88
754.084	35888.6								1049.08	1662.25	1642.62	1642.61	1642.61	1651.5	1642.6	1651.53
753.084	35958.9								1048.98	1655	1642.76	1642.74	1642.74	1653.33	1642.74	1653.35
752.084	35858.4								1048.88	1663.75	1642.98	1642.97	1642.97	1655.55	1642.96	1655.58
751.084	34893.6								1048.78	1675.12	1643.33	1643.32	1643.32	1658.22	1643.31	1658.24
750.084	35516.7								1048.68	1700.25	1643.95	1643.93	1643.93	1661.49	1643.93	1661.52
749.084	36330.8								1048.58	1687	1644.41	1644.4	1644.4	1664.96	1644.39	1664.99
748.084	36561.9								1048.48	1672.25	1644.72	1644.7	1644.7	1668.58	1644.7	1668.61
747.084	35416.2								1048.38	1665.62	1644.94	1644.93	1644.93	1672.43	1644.92	1672.45
746.084	36511.7								1048.28	1677.5	1645.3	1645.28	1645.28	1676.62	1645.28	1676.65
745.084	36350.8								1048.18	1693.25	1645.82	1645.8	1645.8	1681.14	1645.8	1681.17
744.084	36129.8								1048.08	1705.12	1646.46	1646.45	1646.44	1685.82	1646.44	1685.85
743.084	36069.4								1047.98	1695.38	1646.99	1646.98	1646.97	1690.31	1646.97	1690.34
742.084	36451.3								1047.88	1697.38	1647.53	1647.52	1647.52	1694.61	1647.52	1694.63
741.084	35948.8								1047.78	1684.25	1647.93	1647.92	1647.92	1698.39	1647.91	1698.42
740.084	37617.2								1047.68	1691.62	1648.4	1648.39	1648.39	1701.76	1648.39	1701.79
739.084	36772.9								1047.58	1697	1648.93	1648.92	1648.92	1704.55	1648.91	1704.58
738.084	37355.8								1047.48	1714	1649.64	1649.63	1649.62	1706.8	1649.62	1706.83
737.084	37335.8								1047.38	1701.12	1650.19	1650.18	1650.18	1708.1	1650.18	1708.13
736.084	36913.7								1047.28	1680.12	1650.52	1650.51	1650.51	1708.34	1650.5	1708.37
735.084	37215.2								1047.18	1700.25	1651.06	1651.05	1651.05	1707.96	1651.04	1707.99
734.084	36200.1								1047.08	1703.12	1651.62	1651.61	1651.61	1706.83	1651.61	1706.85
733.084	35868.4								1046.98	1697.88	1652.12	1652.11	1652.11	1704.92	1652.11	1704.95
732.084	36672.4								1046.88	1672.25	1652.34	1652.33	1652.33	1702.13	1652.32	1702.16
731.084	37225.2								1046.78	1690.5	1652.75	1652.74	1652.74	1699.07	1652.74	1699.1
730.084	36602.1								1046.68	1694.75	1653.21	1653.2	1653.2	1695.72	1653.19	1695.75
729.084	36169.9								1046.58	1685.5	1653.56	1653.55	1653.55	1692.08	1653.54	1692.11
728.084	36913.7								1046.48	1699.5	1654.06	1654.05	1654.05	1688.54	1654.04	1688.57
727.084	36943.8								1046.38	1690.25	1654.45	1654.44	1654.44	1684.96	1654.43	1684.99
726.084	37245.3								1046.28	1690	1654.83	1654.83	1654.82	1681.54	1654.82	1681.57
725.084	36541.8								1046.18	1687	1655.18	1655.17	1655.17	1678.33	1655.17	1678.36
724.084	35737.8								1046.08	1682.25	1655.47	1655.47	1655.46	1675.37	1655.46	1675.4
723.084	36139.8								1045.98	1689.75	1655.85	1655.84	1655.84	1672.81	1655.83	1672.84
722.084	36511.7								1045.88	1670.38	1656	1656	1655.99	1670.38	1655.99	1670.41
721.084	36953.8								1045.78	1663.5	1656.09	1656.08	1656.08	1668.21	1656.07	1668.24
720.084	37285.5								1045.68	1666	1656.19	1656.19	1656.18	1666.39	1656.18	1666.42
719.084	36712.7								1045.58	1649	1656.27	1656.27	1656.26	1664.83	1656.26	1664.86
718.084	36632.2								1045.48	1659.88	1656.31	1656.31	1656.3	1663.5	1656.3	1663.53
717.084	36642.3								1045.38	1649.62	1656.38	1656.38	1656.38	1662.43	1656.37	1662.46
716.084	36300.6								1045.28	1667.75	1656.51	1656.5	1656.5	1661.61	1656.49	1661.64
715.084	36531.8								1045.18	1668.38	1656.64	1656.63	1656.63	1660.96	1656.62	1660.99
714.084	37014.2								1045.08	1658.12	1656.65	1656.65	1656.64	1660.34	1656.64	1660.37
713.084	36692.6								1044.98	1658	1656.67	1656.66	1656.66	1659.83	1656.65	1659.86
712.084	36602.1								1044.88	1680.75	1656.93	1656.92	1656.92	1659.66	1656.91	1659.69
711.084	36340.8								1044.78	1654.25	1656.96	1656.95	1656.95	1659.33	1656.94	1659.36
710.084	36541.8								1044.68	1659	1656.98	1656.98	1656.97	1659.06	1656.97	1659.09
709.084	36702.6								1044.58	1641.38	1657.15	1657.15	1657.14	1658.98	1657.14	1659.01
708.084	36411.2								1044.48	1649.12	1657.24	1657.24	1657.23	1658.87	1657.23	1658.89
707.084	36320.7								1044.38	1669.62	1657.38	1657.37	1657.37	1658.83	1657.36	1658.86
706.084	36431.2								1044.28	1631	1657.67	1657.66	1657.66	1658.97	1657.65	1659
705.084	36953.8								1044.18	1662	1657.71	1657.71	1657.71	1658.89	1657.7	1658.92
704.084	36913.7								1044.08	1657.88	1657.72	1657.71	1657.71	1658.78	1657.7	1658.81
703.084	36762.9								1043.98	1647.38	1657.83	1657.83	1657.82	1658.8	1657.82	1658.83
702.084	37315.7								1043.88	1672.88	1657.99	1657.99	1657.99	1658.88	1657.98	1658.91
701.084	36561.9								1043.78	1658.12	1657.99	1657.99	1657.99	1658.81	1657.98	1658.84
700.084	35938.8								1043.68	1657.12	1658	1658	1658	1658.75	1657.99	1658.78
699.084	36381								1043.58	1668.5	1658.12	1658.12	1658.11	1658.81	1658.11	1658.84
698.084	35898.6								1043.48	1679.5	1658.35	1658.35	1658.35	1658.99	1658.34	1659.02
697.084	36531.8								1043.38	1682.62	1658.61	1658.61	1658.61	1659.2	1658.6	1659.23
696.084	36350.8								1043.28	1655.62	1658.64	1658.65	1658.64	1659.19	1658.63	1659.22
695.084	37114.7								1043.18	1651.12	1658.73	1658.73	1658.72	1659.24	1658.72	1659.27
694.084	37426.2								1043.08	1652.88	1658.79	1658.79	1658.79	1659.27	1658.78	1659.3
693.084	36772.9								1042.98	1647.38	1658.92	1658.92	1658.91	1659.37	1658.91	1659.4
692.084	36702.6								1042.88	1673	1659.07	1659.07	1659.07	1659.49	1659.06	1659.52
691.084	36662.4								1042.78	1668.75	1659.18	1659.18	1659.17	1659.57	1659.16	1659.6
690.084	37396.1								1042.68	1664	1659.23	1659.23	1659.23	1659.6	1659.22	1659.63
689.084	37114.7								1042.58	1653	1659.3	1659.3	1659.3	1659.64	1659.29	1659.68
688.084	37637.2								1042.48	1661.88	1659.33	1659.33	1659.32	1659.65	1659.31	1659.68
687.084	38330.7								1042.38	1658.75	1659.33	1659.34	1659.33	1659.64	1659.32	1659.67
686.084	37576.9								1042.28	1667	1659.41	1659.42	1659.41	1659.71	1659.4	1659.74
685.084	37456.3								1042.18	1677	1659.61	1659.61	1659.6	1659.88	1659.6	1659.91
684.084	37024.2								1042.08	1674.25	1659.76	1659.77	1659.76	1660.03	1659.75	1660.06
683.084	37034.2								1041.98	1639.38	1659.99	1659.99	1659.99	1660.24	1659.98	1660.27
682.084	36853.3								1041.88	1661.5	1660.01	1660.01	1660.01	1660.24	1659.99	1660.28
681.084	37737.8								1041.78	1651.75	1660.1	1660.1	1660.1	1660.32	1660.09	1660.36
680.084	37215.2								1041.68	1660.88	1660.11	1660.11	1660.11	1660.32	1660.1	1660.35
679.084	36883.5								1041.58	1646.12	1660.26	1660.27	1660.26	1660.46	1660.25	1660.5
678.084	37546.8								1041.48	1653.25	1660.34	1660.34	1660.34	1660.53	1660.33	1660.57
677.084	36903.6								1041.38	1659.88	1660.34	1660.35	1660.34	1660.53	1660.33	1660.56
676.084	37114.7								1041.28	1647.62	1660.48	1660.49	1660.48	1660.66	1660.47	1660.69
675.084	38260.3								1041.18	1640.12	1660.71	1660.71	1660.71	1660.88	1660.7	1660.91
674.084	37355.8								1041.08	1660.25	1660.71	1660.72	1660.71	1660.87	1660.7	1660.91
673.084	36270.4								1040.98	1654.38	1660.78	1660.79	1660.79	1660.94	1660.77	1660.97
672.084	36712.7								1040.88	1655	1660.85	1660.86	1660.85	1660.99	1660.84	1661.03
671.084	37516.7								1040.78	1641	1661.07	1661.08	1661.07	1661.21	1661.06	1661.24
670.084	37174.9								1040.68	1662.5	1661.08	1661.09	1661.08	1661.22	1661.07	1661.26
669.084	37305.6								1040.58	1642.75	1661.29	1661.29	1661.29	1661.41	1661.28	1661.45
668.084	37999.1								1040.48	1659.25	1661.31	1661.32	1661.31	1661.43	1661.3	1661.47
667.084	37667.4								1040.38	1682.88	1661.54	1661.55	1661.54	1661.66	1661.53	1661.7
666.084	37868.4								1040.28	1662.38	1661.55	1661.56	1661.55	1661.66	1661.54	1661.7
665.084	38069.4								1040.18	1649.88	1661.68	1661.69	1661.68	1661.79	1661.67	1661.83
664.084	37989								1040.08	1660.62	1661.69	1661.7	1661.69	1661.8	1661.68	1661.84
663.084	38210.1								1039.98	1651.75	1651.76	1651.77	1651.76	1651.86	1651.75	1651.9
662.084	38380.9								1039.88	1664.88	1664.88	1664.89	1664.89	1664.98	1664.88	1665.03
661.084	37818.2								1039.78	1689.12	1689.13	1689.15	1689.14	1689.23	1689.12	1689.27
660.084	37727.7								1039.68	1658.38	1658.38	1658.4	1658.39	1658.47	1658.38	1658.52
659.084	37948.8								1039.58	1656.62	1656.63	1656.65	1656.64	1656.72	1656.62	1656.77
658.084	37365.9								1039.48	1651.25	1651.26	1651.27	1651.27	1651.34	1651.25	1651.39
657.084	37928.7								1039.38	1645.38	1645.38	1645.4	1645.39	1645.46	1645.38	1645.51
656.084	37546.8								1039.28	1645.75	1645.76	1645.77	1645.77	1645.84	1645.75	1645.88
655.084	37898.6								1039.18	1646.12	1646.13	1646.15	1646.14	1646.21	1646.12	1646.26
654.084	37727.7								1039.08	1652.5	1652.51	1652.52	1652.52	1652.58	1652.5	1652.63
653.084	38913.6								1038.98	1655.25	1655.26	1655.27	1655.27	1655.33	1655.25	1655.38
652.084	38401.1								1038.88	1643.88	1643.88	1643.9	1643.89	1643.95	1643.88	1644
651.084	38471.4								1038.78	1655.38	1655.38	1655.4	1655.39	1655.45	1655.38	1655.5
650.084	38190								1038.68	1640.5	1640.51	1640.53	1640.52	1640.57	1640.5	1640.62
649.084	38823.2								1038.58	1663.12	1663.13	1663.15	1663.14	1663.19	1663.12	1663.25
648.084	38963.8								1038.48	1661	1661.01	1661.03	1661.02	1661.07	1661	1661.12
647.084	39024.2								1038.38	1655.75	1655.76	1655.78	1655.77	1655.82	1655.75	1655.87
646.084	38702.6								1038.28	1661	1661.01	1661.03	1661.02	1661.06	1661	1661.12
645.084	38129.7								1038.18	1659.12	1659.13	1659.15	1659.14	1659.19	1659.12	1659.24
644.084	38692.5								1038.08	1649.75	1649.76	1649.78	1649.77	1649.81	1649.75	1649.87
643.084	37888.5								1037.98	1648.62	1648.63	1648.65	1648.64	1648.68	1648.62	1648.74
642.084	38602.1								1037.88	1647	1647.01	1647.03	1647.02	1647.06	1647	1647.12
641.084	39275.4								1037.78	1650.25	1650.26	1650.28	1650.27	1650.31	1650.25	1650.36
640.084	38049.3								1037.68	1650	1650.01	1650.03	1650.02	1650.05	1650	1650.11
639.084	38149.8								1037.58	1671.62	1671.63	1671.66	1671.65	1671.68	1671.62	1671.74
638.084	38963.8								1037.48	1644.88	1644.88	1644.91	1644.9	1644.93	1644.88	1644.99
637.084	38320.7								1037.38	1660	1660.01	1660.03	1660.02	1660.05	1660	1660.11
636.084	38752.8								1037.28	1669.38	1669.38	1669.41	1669.4	1669.42	1669.38	1669.49
635.084	38099.6								1037.18	1647.25	1647.26	1647.28	1647.28	1647.3	1647.25	1647.36
634.084	38049.3								1037.08	1654.12	1654.13	1654.16	1654.15	1654.17	1654.12	1654.24
633.084	38270.4								1036.98	1672.5	1672.51	1672.54	1672.53	1672.55	1672.5	1672.61
632.084	38803.1								1036.88	1664.12	1664.13	1664.16	1664.15	1664.17	1664.12	1664.24
631.084	38813.1								1036.78	1633.75	1633.76	1633.79	1633.78	1633.79	1633.75	1633.86
630.084	38481.4								1036.68	1636.88	1636.88	1636.91	1636.9	1636.92	1636.88	1636.99
629.084	38903.6								1036.58	1656.25	1656.26	1656.29	1656.28	1656.29	1656.25	1656.36
628.084	38963.8								1036.48	1666.38	1666.38	1666.41	1666.4	1666.41	1666.38	1666.49
627.084	38622.2								1036.38	1665.75	1665.76	1665.79	1665.78	1665.79	1665.75	1665.87
626.084	38803.1								1036.28	1652.75	1652.76	1652.79	1652.78	1652.79	1652.75	1652.87
625.084	39124.7								1036.18	1682	1682.01	1682.04	1682.03	1682.04	1682	1682.12
624.084	37968.9								1036.08	1654	1654.01	1654.04	1654.03	1654.04	1654	1654.12
623.084	38803.1								1035.98	1655.88	1655.88	1655.92	1655.91	1655.91	1655.88	1655.99
622.084	40179.9								1035.88	1681.62	1681.63	1681.67	1681.66	1681.66	1681.62	1681.75
621.084	38843.2								1035.78	1652.88	1652.88	1652.92	1652.91	1652.91	1652.88	1653
620.084	38561.8								1035.68	1662.75	1662.76	1662.8	1662.79	1662.78	1662.75	1662.87
619.084	39024.2								1035.58	1669.38	1669.38	1669.42	1669.41	1669.41	1669.38	1669.5
618.084	39456.3								1035.48	1674.38	1674.38	1674.42	1674.41	1674.41	1674.38	1674.5
617.084	39918.6								1035.38	1664.75	1664.76	1664.8	1664.79	1664.78	1664.75	1664.88
616.084	38943.8								1035.28	1648.5	1648.51	1648.55	1648.54	1648.53	1648.5	1648.63
615.084	38923.7								1035.18	1659.12	1659.13	1659.18	1659.17	1659.15	1659.12	1659.26
614.084	37838.2								1035.08	1644.5	1644.51	1644.55	1644.55	1644.53	1644.5	1644.63
613.084	38662.3								1034.98	1675	1675.01	1675.06	1675.05	1675.03	1675	1675.14
612.084	39657.3								1034.88	1673.12	1673.13	1673.18	1673.17	1673.15	1673.12	1673.26
611.084	39486.4								1034.78	1669.88	1669.88	1669.93	1669.92	1669.9	1669.88	1670.02
610.084	38933.7								1034.68	1679	1679.01	1679.06	1679.05	1679.03	1679	1679.14
609.084	39968.8								1034.58	1647.5	1647.51	1647.56	1647.55	1647.53	1647.5	1647.64
608.084	39818.1								1034.48	1646.88	1646.88	1646.94	1646.93	1646.9	1646.88	1647.02
607.084	38380.9								1034.38	1653.5	1653.51	1653.56	1653.56	1653.53	1653.5	1653.65
606.084	39024.2								1034.28	1658.75	1658.76	1658.82	1658.81	1658.77	1658.75	1658.9
605.084	39144.8								1034.18	1667.62	1667.63	1667.69	1667.68	1667.65	1667.62	1667.78
604.084	39044.2								1034.08	1665.25	1665.26	1665.32	1665.31	1665.27	1665.25	1665.41
603.084	40019.1								1033.98	1669.5	1669.51	1669.57	1669.56	1669.52	1669.5	1669.66
602.084	39828.2								1033.88	1660.38	1660.38	1660.45	1660.44	1660.4	1660.38	1660.54
601.084	38923.7								1033.78	1656.25	1656.26	1656.33	1656.32	1656.27	1656.25	1656.42
600.084	39767.8								1033.68	1651.62	1651.63	1651.7	1651.7	1651.65	1651.62	1651.8
599.084	39999								1033.58	1643.25	1643.26	1643.33	1643.32	1643.27	1643.25	1643.43
598.084	40531.6								1033.48	1662.88	1662.88	1662.96	1662.95	1662.9	1662.88	1663.06
597.084	39747.8								1033.38	1649.62	1649.63	1649.71	1649.7	1649.64	1649.62	1649.82
596.084	39808.1								1033.28	1675.12	1675.13	1675.21	1675.21	1675.14	1675.12	1675.32
595.084	39295.5								1033.18	1671.88	1671.88	1671.96	1671.96	1671.89	1671.88	1672.08
594.084	40551.7								1033.08	1667.25	1667.26	1667.34	1667.34	1667.27	1667.25	1667.46
593.084	40230.1								1032.98	1690.75	1690.76	1690.85	1690.84	1690.77	1690.75	1690.96
592.084	40581.9								1032.88	1672.75	1672.76	1672.85	1672.85	1672.77	1672.75	1672.97
591.084	40692.4								1032.78	1674.25	1674.26	1674.35	1674.35	1674.27	1674.25	1674.48
590.084	40883.4								1032.68	1674.38	1674.38	1674.48	1674.48	1674.39	1674.38	1674.61
589.084	39938.7								1032.58	1657.88	1657.88	1657.98	1657.99	1657.89	1657.88	1658.12
588.084	40682.4								1032.48	1664.5	1664.51	1664.61	1664.62	1664.52	1664.5	1664.75
587.084	39908.6								1032.38	1664.62	1664.63	1664.74	1664.75	1664.64	1664.62	1664.89
586.084	40823.1								1032.28	1654.88	1654.88	1654.99	1655	1654.89	1654.88	1655.14
585.084	40431.1								1032.18	1652.38	1652.38	1652.5	1652.51	1652.39	1652.38	1652.66
584.084	40893.4								1032.08	1663	1663.01	1663.13	1663.14	1663.02	1663	1663.29
583.084	40883.4								1031.98	1675.88	1675.88	1676.01	1676.02	1675.89	1675.88	1676.18
582.084	40019.1								1031.88	1684.62	1672.06	1672.19	1672.21	1672.07	1672.05	1672.37
581.084	39697.5								1031.78	1673	1672.08	1672.22	1672.24	1672.09	1672.08	1672.41
580.084	39948.8								1031.68	1689.75	1672.55	1672.69	1672.71	1672.56	1672.54	1672.88
579.084	40863.3								1031.58	1680.5	1672.75	1672.9	1672.93	1672.76	1672.75	1673.11
578.084	40903.5								1031.48	1682.62	1673.01	1673.16	1673.2	1673.02	1673.01	1673.38
577.084	39888.4								1031.38	1667.62	1673.16	1673.32	1673.36	1673.17	1673.15	1673.55
576.084	40561.8								1031.28	1669.5	1673.26	1673.43	1673.48	1673.27	1673.26	1673.67
575.084	41315.5								1031.18	1680.5	1673.45	1673.62	1673.68	1673.46	1673.44	1673.88
574.084	41486.4								1031.08	1693.25	1673.97	1674.15	1674.21	1673.98	1673.96	1674.41
573.084	41184.9								1030.98	1694.12	1674.49	1674.68	1674.76	1674.5	1674.49	1674.97
572.084	40471.3								1030.88	1680.38	1674.65	1674.85	1674.93	1674.66	1674.64	1675.15
571.084	40421.1								1030.78	1666.88	1674.86	1675.07	1675.16	1674.87	1674.86	1675.39
570.084	41315.5								1030.68	1671.5	1674.96	1675.17	1675.28	1674.96	1674.95	1675.51
569.084	41426.1								1030.58	1664.62	1675.24	1675.46	1675.59	1675.25	1675.24	1675.83
568.084	41878.3								1030.48	1670.62	1675.37	1675.6	1675.74	1675.38	1675.36	1675.99
567.084	40461.3								1030.38	1679.62	1675.48	1675.72	1675.88	1675.49	1675.47	1676.14
566.084	39687.4								1030.28	1668.38	1675.68	1675.93	1676.11	1675.68	1675.67	1676.39
565.084	39928.7								1030.18	1679.25	1675.77	1676.04	1676.24	1675.78	1675.77	1676.53
564.084	40913.5								1030.08	1684.75	1676	1676.29	1676.52	1676.01	1676	1676.82
563.084	41255.2								1029.98	1693.62	1676.46	1676.76	1677.03	1676.47	1676.46	1677.34
562.084	40983.9								1029.88	1705.12	1677.21	1677.52	1677.83	1677.22	1677.21	1678.16
561.084	41998.9								1029.78	1688.5	1677.51	1677.84	1678.19	1677.52	1677.51	1678.54
560.084	42089.4								1029.68	1689.5	1677.82	1678.17	1678.58	1677.83	1677.82	1678.94
559.084	42642.1								1029.58	1682.75	1677.95	1678.31	1678.79	1677.96	1677.95	1679.17
558.084	43024								1029.48	1685.5	1678.15	1678.53	1679.09	1678.16	1678.14	1679.49
557.084	43174.8								1029.38	1689	1678.43	1678.84	1679.49	1678.44	1678.43	1679.91
556.084	42601.9								1029.28	1684.12	1678.58	1679.01	1679.78	1678.59	1678.58	1680.23
555.084	42501.4								1029.18	1691.88	1678.93	1679.38	1680.3	1678.94	1678.93	1680.77
554.084	42079.3								1029.08	1678.12	1678.95	1679.43	1680.52	1678.96	1678.95	1681.02
553.084	41818								1028.98	1701.62	1679.55	1680.05	1681.36	1679.55	1679.54	1681.89
552.084	40431.1								1028.88	1686.5	1679.73	1680.27	1681.85	1679.73	1679.72	1682.4
551.084	38712.6								1028.78	1692.62	1680.06	1680.64	1682.55	1680.07	1680.06	1683.14
550.084	37737.8								1028.68	1676.38	1680.17	1680.78	1683.1	1680.17	1680.16	1683.73
549.084	37516.7								1028.58	1694.88	1680.55	1681.21	1684.02	1680.56	1680.55	1684.7
548.084	36491.6								1028.48	1690.75	1680.82	1681.52	1684.94	1680.82	1680.81	1685.66
547.084	35034.3								1028.38	1698	1681.27	1682.02	1686.18	1681.27	1681.26	1686.95
546.084	34059.4								1028.28	1685.62	1681.38	1682.19	1687.23	1681.38	1681.38	1688.06
545.084	34471.5								1028.18	1707.62	1682.07	1682.94	1689.02	1682.07	1682.06	1689.92
544.084	32964								1028.08	1688.25	1682.23	1683.17	1690.48	1682.23	1682.22	1691.44
543.084	31235.4								1027.98	1699.75	1682.69	1683.71	1692.42	1682.69	1682.68	1693.47
542.084	31315.8								1027.88	1706.5	1683.31	1684.42	1694.73	1683.31	1683.31	1695.86
541.084	30411.3								1027.78	1703.12	1683.83	1685.04	1697.13	1683.83	1683.82	1698.36
540.084	30401.2								1027.68	1706.75	1684.43	1685.76	1699.79	1684.43	1684.42	1701.13
539.084	33637.3								1027.58	1719	1685.33	1686.79	1702.89	1685.34	1685.33	1704.37
538.084	40792.9								1027.48	1702.5	1685.78	1687.39	1705.65	1685.78	1685.78	1707.28
537.084	52360.5								1027.38	1699.12	1686.13	1687.92	1708.35	1686.13	1686.12	1710.15
536.084	65154.1								1027.28	1716.88	1686.93	1688.93	1711.48	1686.94	1686.93	1713.49
535.084	78209.1								1027.18	1713.5	1687.63	1689.86	1714.4	1687.63	1687.62	1716.65
534.084	92299.2								1027.08	1740.88	1689.02	1691.54	1717.83	1689.02	1689.02	1720.37
533.084	101073								1026.98	1704.25	1689.42	1692.28	1720.01	1689.42	1689.41	1722.88
532.084	80138.7								1026.88	1700.75	1689.71	1692.99	1721.73	1689.72	1689.71	1725.02
531.084	47415.9								1026.78	1709.62	1690.24	1694	1723.28	1690.24	1690.23	1727.07
530.084	30280.7								1026.68	1723.12	1691.1	1695.46	1724.72	1691.1	1691.09	1729.1
529.084	28280.7								1026.58	1722.62	1691.92	1697.02	1725.63	1691.92	1691.92	1730.75
528.084	27386.2								1026.48	1735.12	1693.05	1699.04	1726.37	1693.05	1693.05	1732.37
527.084	27175.2								1026.38	1746.38	1694.44	1701.51	1726.91	1694.45	1694.44	1733.99
526.084	27205.3								1026.28	1733.62	1695.47	1703.85	1726.64	1695.47	1695.46	1735.04
525.084	27114.9								1026.18	1717.88	1696.06	1706.02	1725.58	1696.06	1696.05	1735.55
524.084	26622.5								1026.08	1755.62	1697.61	1709.48	1725.18	1697.62	1697.61	1737.06
523.084	26270.7								1025.98	1756	1699.14	1713.27	1724.55	1699.14	1699.14	1738.69
522.084	25034.5								1025.88	1761.5	1700.77	1717.56	1723.88	1700.77	1700.77	1740.68
521.084	25456.7								1025.78	1750	1702.06	1721.94	1722.82	1702.06	1702.05	1742.72
520.084	25969.2								1025.68	1726.75	1702.7	1726.13	1721.14	1702.71	1702.7	1744.58
519.084	26280.8								1025.58	1748	1703.89	1731.32	1720.07	1703.89	1703.88	1747.52
518.084	26170.2								1025.48	1755	1705.22	1737.1	1719.29	1705.23	1705.22	1751.18
517.084	25687.8								1025.38	1764	1706.76	1743.46	1718.88	1706.76	1706.76	1755.59
516.084	24914								1025.28	1762.12	1708.21	1750.04	1718.57	1708.21	1708.21	1760.41
515.084	25265.7								1025.18	1752.88	1709.38	1756.54	1718.17	1709.38	1709.37	1765.34
514.084	25828.5								1025.08	1758.88	1710.67	1763.22	1718.1	1710.67	1710.67	1770.66
513.084	25939								1024.98	1773.75	1712.32	1770.16	1718.57	1712.32	1712.32	1776.42
512.084	25587.3								1024.88	1768	1713.78	1776.61	1719.03	1713.78	1713.77	1781.88
511.084	25607.4								1024.78	1783.12	1715.59	1782.95	1720	1715.59	1715.59	1787.37
510.084	25617.5								1024.68	1784.25	1717.39	1788.6	1721.09	1717.39	1717.38	1792.32
509.084	25939								1024.58	1766.12	1718.66	1792.9	1721.79	1718.66	1718.66	1796.04
508.084	25738								1024.48	1797.75	1720.73	1797.03	1723.37	1720.73	1720.73	1799.69
507.084	26150.1								1024.38	1801.88	1722.85	1800.15	1725.1	1722.85	1722.85	1802.41
506.084	26210.4								1024.28	1801.75	1724.91	1802.09	1726.84	1724.92	1724.91	1804.03
505.084	26160.2								1024.18	1796.75	1726.79	1802.75	1728.45	1726.8	1726.79	1804.42
504.084	26190.3								1024.08	1814	1729.07	1802.76	1730.52	1729.08	1729.07	1804.21
503.084	26552.1								1023.98	1815.25	1731.33	1801.8	1732.59	1731.33	1731.32	1803.07
502.084	27637.5								1023.88	1814.5	1733.5	1799.96	1734.61	1733.5	1733.5	1801.08
501.084	26944								1023.78	1795.62	1735.13	1796.95	1736.11	1735.13	1735.12	1797.94
500.084	26873.7								1023.68	1805.88	1736.98	1793.72	1737.85	1736.98	1736.97	1794.61
499.084	27054.6								1023.58	1806	1738.78	1790.21	1739.57	1738.78	1738.78	1791
498.084	26501.8								1023.48	1781.75	1739.9	1785.94	1740.61	1739.91	1739.9	1786.66
497.084	26522								1023.38	1799.75	1741.47	1782.2	1742.11	1741.47	1741.47	1782.86
496.084	25989.3								1023.28	1781.62	1742.52	1778.18	1743.1	1742.52	1742.52	1778.77
495.084	25627.5								1023.18	1787.75	1743.7	1774.61	1744.23	1743.7	1743.7	1775.16
494.084	25305.9								1023.08	1783.62	1744.75	1771.31	1745.23	1744.75	1744.74	1771.81
493.084	24672.8								1022.98	1771.5	1745.45	1768.1	1745.89	1745.45	1745.44	1768.56
492.084	26099.8								1022.88	1770.12	1746.09	1765.29	1746.51	1746.09	1746.09	1765.72
491.084	25677.8								1022.78	1754.25	1746.31	1762.5	1746.69	1746.31	1746.3	1762.9
490.084	25738								1022.68	1771.5	1746.96	1760.59	1747.32	1746.96	1746.96	1760.95
489.084	25647.6								1022.58	1741.5	1747.12	1758.56	1747.44	1747.12	1747.11	1758.9
488.084	25557.2								1022.48	1757.62	1747.39	1757	1747.7	1747.39	1747.39	1757.32
487.084	25687.8								1022.38	1750	1747.46	1755.54	1747.74	1747.46	1747.45	1755.84
486.084	25316								1022.28	1756	1747.68	1754.51	1747.95	1747.68	1747.68	1754.78
485.084	25587.3								1022.18	1748.5	1747.7	1753.49	1747.95	1747.7	1747.7	1753.75
484.084	25838.5								1022.08	1729.25	1748.21	1753.14	1748.45	1748.21	1748.21	1753.39
483.084	25637.5								1021.98	1740.12	1748.43	1752.67	1748.66	1748.44	1748.43	1752.9
482.084	25637.5								1021.88	1747.5	1748.46	1752.12	1748.67	1748.46	1748.46	1752.34
481.084	25748.1								1021.78	1728.5	1749.01	1752.19	1749.21	1749.01	1749.01	1752.4
480.084	26270.7								1021.68	1748.38	1749.03	1751.82	1749.21	1749.03	1749.03	1752.01
479.084	25637.5								1021.58	1721.62	1749.79	1752.24	1749.96	1749.79	1749.78	1752.43
478.084	26250.6								1021.48	1748.25	1749.83	1752.01	1749.99	1749.83	1749.82	1752.18
477.084	26170.2								1021.38	1748.88	1749.85	1751.8	1750.01	1749.85	1749.85	1751.97
476.084	25858.7								1021.28	1752.25	1749.92	1751.67	1750.07	1749.92	1749.91	1751.83
475.084	26069.7								1021.18	1747	1750	1751.58	1750.14	1750	1749.99	1751.73
474.084	25607.4								1021.08	1743.12	1750.19	1751.62	1750.32	1750.19	1750.18	1751.76
473.084	25486.8								1020.98	1759.12	1750.42	1751.73	1750.55	1750.42	1750.42	1751.86
472.084	25878.8								1020.88	1747.75	1750.49	1751.69	1750.62	1750.49	1750.49	1751.82
471.084	25506.9								1020.78	1735.75	1750.9	1752	1751.02	1750.9	1750.9	1752.12
470.084	25848.6								1020.68	1762.12	1751.19	1752.2	1751.3	1751.19	1751.19	1752.32
469.084	25808.4								1020.58	1749.12	1751.25	1752.18	1751.36	1751.25	1751.25	1752.3
468.084	24984.3								1020.48	1756	1751.37	1752.24	1751.48	1751.38	1751.37	1752.35
467.084	25466.7								1020.38	1746.75	1751.5	1752.3	1751.6	1751.5	1751.5	1752.41
466.084	25346.1								1020.28	1730.5	1752.08	1752.83	1752.17	1752.08	1752.08	1752.93
465.084	26300.8								1020.18	1729.88	1752.69	1753.39	1752.78	1752.69	1752.69	1753.49
464.084	26501.8								1020.08	1734.12	1753.21	1753.86	1753.29	1753.21	1753.2	1753.95
463.084	25476.8								1019.98	1745.62	1753.41	1754.02	1753.5	1753.42	1753.41	1754.11
462.084	25426.5								1019.88	1761.5	1753.63	1754.2	1753.7	1753.63	1753.62	1754.28
461.084	25657.7								1019.78	1768	1754	1754.54	1754.08	1754	1754	1754.62
460.084	25295.8								1019.68	1777.75	1777.75	1778.26	1777.83	1777.75	1777.75	1778.34
459.084	25758.2								1019.58	1776.25	1776.25	1776.73	1776.32	1776.25	1776.25	1776.81
458.084	24954.2								1019.48	1761.38	1761.38	1761.83	1761.44	1761.38	1761.38	1761.9
457.084	25416.5								1019.38	1752.12	1752.13	1752.55	1752.19	1752.13	1752.12	1752.62
456.084	25014.5								1019.28	1756.88	1756.88	1757.28	1756.94	1756.88	1756.88	1757.35
455.084	25657.7								1019.18	1774.25	1774.25	1774.63	1774.31	1774.25	1774.25	1774.7
454.084	25597.3								1019.08	1783.5	1783.5	1783.86	1783.56	1783.5	1783.5	1783.93
453.084	24974.2								1018.98	1775.12	1775.13	1775.47	1775.18	1775.13	1775.12	1775.53
452.084	25597.3								1018.88	1767.38	1767.38	1767.7	1767.43	1767.38	1767.38	1767.76
451.084	26009.4								1018.78	1738.75	1738.75	1739.06	1738.81	1738.75	1738.75	1739.12
450.084	25155.2								1018.68	1767.62	1767.63	1767.92	1767.68	1767.63	1767.62	1767.98
449.084	25336								1018.58	1769.88	1769.88	1770.16	1769.93	1769.88	1769.88	1770.21
448.084	25637.5								1018.48	1775.38	1775.38	1775.64	1775.42	1775.38	1775.38	1775.7
447.084	26120								1018.38	1788.38	1788.38	1788.63	1788.42	1788.38	1788.38	1788.69
446.084	26632.5								1018.28	1771.5	1771.5	1771.75	1771.55	1771.5	1771.5	1771.8
445.084	27808.3								1018.18	1763.12	1763.13	1763.36	1763.17	1763.13	1763.12	1763.41
444.084	29738								1018.08	1774.75	1774.75	1774.97	1774.79	1774.75	1774.75	1775.03
443.084	30974.1								1017.98	1777.38	1777.38	1777.59	1777.42	1777.38	1777.38	1777.64
442.084	32240.4								1017.88	1761.88	1761.88	1762.08	1761.92	1761.88	1761.88	1762.13
441.084	34129.8								1017.78	1785.62	1785.63	1785.82	1785.66	1785.63	1785.62	1785.87
440.084	33396.2								1017.68	1806.5	1806.5	1806.69	1806.54	1806.5	1806.5	1806.73
439.084	31325.8								1017.58	1782.12	1782.13	1782.31	1782.16	1782.13	1782.12	1782.35
438.084	28180.2								1017.48	1785.25	1785.25	1785.43	1785.29	1785.25	1785.25	1785.47
437.084	26059.7								1017.38	1764	1764	1764.17	1764.04	1764	1764	1764.21
436.084	25687.8								1017.28	1775	1775	1775.16	1775.03	1775	1775	1775.2
435.084	25175.2								1017.18	1779.75	1779.75	1779.91	1779.78	1779.75	1779.75	1779.95
434.084	25517								1017.08	1771.25	1771.25	1771.4	1771.28	1771.25	1771.25	1771.44
433.084	24803.4								1016.98	1791.62	1791.63	1791.77	1791.66	1791.63	1791.62	1791.81
432.084	25054.7								1016.88	1788.38	1788.38	1788.52	1788.41	1788.38	1788.38	1788.56
431.084	24652.7								1016.78	1769.5	1769.5	1769.64	1769.53	1769.5	1769.5	1769.67
430.084	23888.8								1016.68	1768.62	1768.63	1768.76	1768.65	1768.63	1768.62	1768.79
429.084	24250.7								1016.58	1767.5	1767.5	1767.63	1767.53	1767.5	1767.5	1767.66
428.084	25064.7								1016.48	1764.12	1764.13	1764.25	1764.15	1764.13	1764.12	1764.28
427.084	24411.5								1016.38	1778	1778	1778.12	1778.03	1778	1778	1778.15
426.084	24954.2								1016.28	1772.25	1772.25	1772.37	1772.28	1772.25	1772.25	1772.4
425.084	24893.8								1016.18	1784	1784	1784.11	1784.03	1784	1784	1784.14
424.084	24632.5								1016.08	1776	1776	1776.11	1776.03	1776	1776	1776.14
423.084	23969.2								1015.98	1758.5	1758.5	1758.61	1758.52	1758.5	1758.5	1758.63
422.084	24672.8								1015.88	1746.88	1746.88	1746.98	1746.9	1746.88	1746.88	1747.01
421.084	24391.3								1015.78	1750.62	1750.63	1750.72	1750.65	1750.63	1750.62	1750.75
420.084	24572.2								1015.68	1764.88	1764.88	1764.97	1764.9	1764.88	1764.88	1765
419.084	24019.5								1015.58	1764	1764	1764.09	1764.02	1764	1764	1764.12
418.084	23728								1015.48	1754.12	1754.13	1754.21	1754.15	1754.13	1754.12	1754.24
417.084	24783.3								1015.38	1764.88	1764.88	1764.96	1764.9	1764.88	1764.88	1764.99
416.084	24883.8								1015.28	1777.62	1777.63	1777.71	1777.65	1777.63	1777.62	1777.73
415.084	24059.7								1015.18	1756.38	1756.38	1756.46	1756.39	1756.38	1756.38	1756.48
414.084	23074.8								1015.08	1741.38	1741.38	1741.45	1741.39	1741.38	1741.38	1741.48
413.084	24290.8								1014.98	1745.5	1745.5	1745.58	1745.52	1745.5	1745.5	1745.6
412.084	24089.8								1014.88	1739.88	1739.88	1739.95	1739.89	1739.88	1739.88	1739.97
411.084	24572.2								1014.78	1749.88	1749.88	1749.95	1749.89	1749.88	1749.88	1749.97
410.084	23788.3								1014.68	1747.75	1747.75	1747.82	1747.77	1747.75	1747.75	1747.84
409.084	24270.8								1014.58	1724	1724	1724.07	1724.02	1724	1724	1724.09
408.084	24341.1								1014.48	1738.88	1738.88	1738.94	1738.89	1738.88	1738.88	1738.96
407.084	23316								1014.38	1727.88	1727.88	1727.94	1727.89	1727.88	1727.88	1727.96
406.084	23808.5								1014.28	1734.88	1734.88	1734.94	1734.89	1734.88	1734.88	1734.96
405.084	23989.3								1014.18	1750	1750	1750.06	1750.02	1750	1750	1750.08
404.084	23617.5								1014.08	1722.75	1722.75	1722.81	1722.77	1722.75	1722.75	1722.83
403.084	24461.7								1013.98	1708	1708	1708.06	1708.02	1708	1708	1708.08
402.084	24220.5								1013.88	1713.75	1713.75	1713.81	1713.77	1713.75	1713.75	1713.83
401.084	23466.8								1013.78	1728	1728	1728.06	1728.02	1728	1728	1728.08
400.084	23657.7								1013.68	1729.5	1729.5	1729.56	1729.51	1729.5	1729.5	1729.57
399.084	23346.2								1013.58	1739.25	1739.25	1739.3	1739.26	1739.25	1739.25	1739.32
398.084	23175.3								1013.48	1726.38	1726.38	1726.43	1726.39	1726.38	1726.38	1726.44
397.084	22934.1								1013.38	1725.88	1725.88	1725.93	1725.89	1725.88	1725.88	1725.94
396.084	23336.1								1013.28	1715.12	1715.13	1715.17	1715.14	1715.13	1715.12	1715.19
395.084	22893.9								1013.18	1711.25	1711.25	1711.3	1711.26	1711.25	1711.25	1711.32
394.084	23316								1013.08	1726.75	1726.75	1726.8	1726.76	1726.75	1726.75	1726.81
393.084	23748.2								1012.98	1717.5	1717.5	1717.55	1717.51	1717.5	1717.5	1717.56
392.084	23677.8								1012.88	1733.88	1733.88	1733.92	1733.89	1733.88	1733.88	1733.94
391.084	24039.6								1012.78	1723.25	1723.25	1723.3	1723.26	1723.25	1723.25	1723.31
390.084	23426.5								1012.68	1708.38	1708.38	1708.42	1708.39	1708.38	1708.38	1708.43
389.084	24280.8								1012.58	1727.25	1727.25	1727.29	1727.26	1727.25	1727.25	1727.31
388.084	24542.1								1012.48	1712.38	1712.38	1712.42	1712.39	1712.38	1712.38	1712.43
387.084	24411.5								1012.38	1721.5	1721.5	1721.54	1721.51	1721.5	1721.5	1721.56
386.084	24461.7								1012.28	1705.5	1705.5	1705.54	1705.51	1705.5	1705.5	1705.55
385.084	23336.1								1012.18	1719	1719	1719.04	1719.01	1719	1719	1719.05
384.084	22833.6								1012.08	1699.88	1699.88	1699.91	1699.89	1699.88	1699.88	1699.93
383.084	23165.2								1011.98	1701.5	1701.5	1701.54	1701.51	1701.5	1701.5	1701.55
382.084	23215.5								1011.88	1739.12	1739.13	1739.16	1739.13	1739.13	1739.12	1739.17
381.084	22833.6								1011.78	1714.88	1714.88	1714.91	1714.88	1714.88	1714.88	1714.92
380.084	22602.5								1011.68	1714.12	1714.13	1714.16	1714.13	1714.13	1714.12	1714.17
379.084	22069.8								1011.58	1711.5	1711.5	1711.53	1711.51	1711.5	1711.5	1711.55
378.084	22542.2								1011.48	1716.38	1716.38	1716.41	1716.38	1716.38	1716.38	1716.42
377.084	22893.9								1011.38	1693.75	1693.75	1693.78	1693.76	1693.75	1693.75	1693.8
376.084	22793.4								1011.28	1711.75	1711.75	1711.78	1711.76	1711.75	1711.75	1711.8
375.084	22994.4								1011.18	1708.62	1708.63	1708.66	1708.63	1708.63	1708.62	1708.67
374.084	22793.4								1011.08	1714.62	1714.63	1714.66	1714.63	1714.63	1714.62	1714.67
373.084	23145.2								1010.98	1708.25	1708.25	1708.28	1708.26	1708.25	1708.25	1708.29
372.084	23215.5								1010.88	1708.62	1708.63	1708.65	1708.63	1708.63	1708.62	1708.67
371.084	22290.9								1010.78	1696.62	1696.63	1696.65	1696.63	1696.63	1696.62	1696.67
370.084	22451.7								1010.68	1692.38	1692.38	1692.4	1692.38	1692.38	1692.38	1692.41
369.084	21567.3								1010.58	1716.12	1716.13	1716.15	1716.13	1716.13	1716.12	1716.16
368.084	20873.8								1010.48	1718.5	1718.5	1718.53	1718.51	1718.5	1718.5	1718.54
367.084	21165.3								1010.38	1715.25	1715.25	1715.28	1715.26	1715.25	1715.25	1715.29
366.084	20924.1								1010.28	1717	1717	1717.03	1717.01	1717	1717	1717.04
365.084	20813.5								1010.18	1715.5	1715.5	1715.53	1715.51	1715.5	1715.5	1715.54
364.084	20883.9								1010.08	1677.25	1677.25	1677.28	1677.26	1677.25	1677.25	1677.29
363.084	20904								1009.98	1706.38	1706.38	1706.4	1706.38	1706.38	1706.38	1706.41
362.084	20461.8								1009.88	1701	1701	1701.03	1701.01	1701	1701	1701.04
361.084	20260.8								1009.78	1719.88	1719.88	1719.9	1719.88	1719.88	1719.88	1719.91
360.084	20793.5								1009.68	1700.62	1700.63	1700.65	1700.63	1700.63	1700.62	1700.66
359.084	21215.5								1009.58	1704.88	1704.88	1704.9	1704.88	1704.88	1704.88	1704.91
358.084	21115								1009.48	1694.12	1694.13	1694.15	1694.13	1694.13	1694.12	1694.16
357.084	22321								1009.38	1713.88	1713.88	1713.9	1713.88	1713.88	1713.88	1713.91
356.084	23496.9								1009.28	1722	1722	1722.02	1722.01	1722	1722	1722.03
355.084	25908.9								1009.18	1708.88	1708.88	1708.9	1708.88	1708.88	1708.88	1708.91
354.084	29024.4								1009.08	1715.38	1715.38	1715.4	1715.38	1715.38	1715.38	1715.41
353.084	35747.8
352.084	40350.7
351.084	36883.5
350.084	38963.8
349.084	45848.1
348.084	41094.4
347.084	25607.4
346.084	19115.1
345.084	18049.8
344.084	18080
343.084	18130.2
342.084	18019.7
341.084	18069.9
340.084	17597.5
339.084	17808.6
338.084	17245.8
337.084	17587.5
336.084	17597.5
335.084	16984.5
334.084	17758.3
333.084	18039.8
332.084	17959.3
331.084	17125.2
330.084	16683
329.084	17125.2
328.084	17678
327.084	16622.7
326.084	16652.8
325.084	16954.3
324.084	17356.3
323.084	17265.9
322.084	17416.7
321.084	16994.5
320.084	16984.5
319.084	17085
318.084	17225.7
317.084	17225.7
316.084	17366.4
315.084	18431.7
314.084	18461.8
313.084	19235.7
312.084	18884
311.084	19868.8
310.084	20492
309.084	21798.5
308.084	21838.7
307.084	18693
306.084	16110.1
305.084	14602.6
304.084	13979.5
303.084	12833.9
302.084	12441.9
301.084	11748.5
300.084	11246
299.084	11477.1
298.084	12160.5
297.084	12472
296.084	12200.7
295.084	12904.2
294.084	13768.5
293.084	14572.5
292.084	15989.5
291.084	17999.5
290.084	21145.2
289.084	28029.5
288.084	37818.2
287.084	35677.5
286.084	36139.8
285.084	29969.1
284.084	15979.5
283.084	8241
282.084	6009.9
281.084	4934.55
280.084	5376.75
279.084	4884.3
278.084	4753.65
277.084	4793.85
276.084	4844.1
275.084	4864.2
274.084	4834.05
273.084	5035.05
272.084	5266.2
271.084	5045.1
270.084	4512.45
269.084	4924.5
268.084	4834.05
267.084	4773.75
266.084	4683.3
265.084	4653.15
264.084	4612.95
263.084	4793.85
262.084	4462.2
261.084	4391.85
260.084	4502.4
259.084	4532.55
258.084	4723.5
257.084	4803.9
256.084	4552.65
255.084	4884.3
254.084	4803.9
253.084	4904.4
252.084	4763.7
251.084	4803.9
250.084	4562.7
249.084	4984.8
248.084	5004.9
247.084	4753.65
246.084	4974.75
245.084	4723.5
244.084	5045.1
243.084	5035.05
242.084	4934.55
241.084	4994.85
240.084	5045.1
239.084	4753.65
238.084	4874.25
237.084	4904.4
236.084	4864.2
235.084	5195.85
234.084	5276.25
233.084	4874.25
232.084	4904.4
231.084	4924.5
230.084	4834.05
229.084	4924.5
228.084	4743.6
227.084	4753.65
226.084	4753.65
225.084	4532.55
224.084	4703.4
223.084	4864.2
222.084	4743.6
221.084	4633.05
220.084	4743.6
219.084	4703.4
218.084	4482.3
217.084	4964.7
216.084	5205.9
215.084	4954.65
214.084	4683.3
213.084	4753.65
212.084	4773.75
211.084	4703.4
210.084	4884.3
209.084	4924.5
208.084	4824
207.084	4904.4
206.084	4512.45
205.084	5155.65
204.084	4683.3
203.084	4482.3
202.084	4954.65
201.084	4753.65
200.084	4723.5
199.084	4773.75
198.084	4793.85
197.084	4844.1
196.084	5226
195.084	5778.75
194.084	6432
193.084	7256.1
192.084	7758.6
191.084	6934.5
190.084	5959.65
189.084	4974.75
188.084	4612.95
187.084	4522.5
186.084	4572.75
185.084	4170.75
184.084	4391.85
183.084	4180.8
182.084	3899.4
181.084	4341.6
180.084	4100.4
179.084	4271.25
178.084	4009.95
177.084	4371.75
176.084	4371.75
175.084	4582.8
174.084	4743.6
173.084	4532.55
172.084	5035.05
171.084	4964.7
170.084	5195.85
169.084	4683.3
168.084	4130.55
167.084	4120.5
166.084	4452.15
165.084	4261.2
164.084	3929.55
163.084	3999.9
162.084	4060.2
161.084	3929.55
160.084	4150.65
159.084	4502.4
158.084	5035.05
157.084	5587.8
156.084	5808.9
155.084	5989.8
154.084	5125.5
153.084	4703.4
152.084	4180.8
151.084	4009.95
150.084	3979.8
149.084	4060.2
148.084	3768.75
147.084	3547.65
146.084	3527.55
145.084	3668.25
144.084	3507.45
143.084	3417
142.084	3638.1
141.084	3587.85
140.084	3839.1
139.084	4090.35
138.084	4793.85
137.084	5256.15
136.084	6582.75
135.084	8964.6
134.084	8100.3
133.084	5145.6
132.084	3427.05
131.084	3195.9
130.084	3085.35
129.084	3185.85
128.084	3427.05
127.084	3256.2
126.084	3346.65
125.084	3688.35
124.084	3758.7
123.084	4050.15
122.084	4160.7
121.084	4331.55
120.084	3718.5
119.084	3366.75
118.084	3306.45
117.084	3386.85
116.084	2984.85
115.084	3125.55
114.084	2954.7
113.084	3075.3
112.084	2974.8
111.084	2924.55
110.084	3165.75
109.084	3226.05
108.084	3336.6
107.084	4120.5
106.084	4733.55
105.084	5095.35
104.084	4944.6
103.084	4361.7
102.084	3507.45
101.084	2753.7
100.084	2934.6
99.084	3105.45
98.084	2934.6
97.084	3155.7
96.084	3145.65
95.084	2984.85
94.084	3004.95
93.084	3316.5
92.084	3567.75
91.084	3718.5
90.084	3788.85
89.084	3105.45
88.084	2984.85
87.084	2874.3
86.084	2602.95
85.084	2753.7
84.084	2844.15
83.084	2753.7
82.084	3095.4
81.084	2974.8
80.084	3226.05
79.084	3266.25
78.084	3497.4
77.084	3628.05
76.084	3517.5
75.084	3115.5
74.084	2984.85
73.084	2773.8
72.084	2623.05
71.084	2924.55
70.084	2723.55
69.084	2713.5
68.084	3226.05
67.084	3246.15
66.084	3537.6
65.084	2954.7
64.084	3226.05
63.084	3326.55
62.084	3316.5
61.084	3356.7
60.084	2964.75
59.084	2834.1
58.084	2683.35
57.084	2663.25
56.084	2522.55
55.084	2623.05
54.084	2552.7
53.084	2914.5
52.084	2793.9
51.084	3175.8
50.084	2763.75
49.084	2834.1
48.084	3135.6
47.084	3718.5
46.084	4090.35
45.084	4371.75
44.084	3457.2
43.084	2693.4
42.084	2331.6
41.084	1969.8
40.084	2090.4
39.084	2190.9
38.084	1999.95
37.084	1929.6
36.084	1798.95
35.084	1829.1
34.084	2020.05
33.084	2030.1
32.084	2301.45
31.084	2753.7
30.084	3266.25
29.084	4773.75
28.084	6421.95
27.084	7698.3
26.084	7416.9
25.084	4844.1
24.084	3025.05
23.084	2291.4
22.084	1638.15
21.084	1346.7
20.084	1206
19.084	1085.4
18.084	1195.95
17.084	1115.55
16.084	1175.85
15.084	1135.65
14.084	1296.45
13.084	1628.1
12.084	1567.8
11.084	1417.05
10.084	1256.25
9.084	1075.35
8.084	944.7
7.084	864.3
6.084	713.55
5.084	371.85
4.084	190.95
3.084	50.25
2.084	30.15
1.084	20.1
0.084	20.1
-0.916	0
[truncated: 17 more columns]

## Sheet: Base Cation (contact time)
Lower Boat Level										Trib 1
	Ca mg/L	St dev	K mg/L	St dev	Mg mg/L	St dev	Na mg/L	St dev			Ca mg/L	St dev	K mg/L	St dev	Mg mg/L	St dev	Na mg/L	St dev
DD no mine 1	9.79		39.545		1.155		37.73			DD no mine 1	4.0425		40.0125		3.50625		37.125
DD no min 2	17.16		38.775		1.32		35.75			DD no min 2	9.94125		39.105		0		40.095
DD no mine 3	11.55		43.34		1.155		37.895			DD no mine 3	8.45625		36.5887		4.57875		36.795
AV no mine	12.8333	3.14266	40.5533	1.99539	1.21	0.0777817	37.125	0.974602		AV no mine	7.48	2.50514	38.5688	1.44826	2.695	1.95531	38.005	1.48398
1min1	22.275		36.41		8.635		45.485			DD 1 min 1	8.12625		38.1562		5.12875		34.0725
1min2	20.24		31.9		8.47		31.735			DD 1 min 2	5.445		41.25		5.8025		37.6612
1min3					9.79		36.135			DD 1 min 3	4.8675		27.555		5.26625		27.0187
av 1min	30.1583	1.0175	34.155	2.255	8.965	0.587239	37.785	5.73338		Av 1 min	6.14625	1.41978	35.6537	5.86431	5.39917	0.290672	32.9175	4.42088
1hr1	20.955		38.885		8.36		39.38			DD 1 hr 1	16.7062		43.4363		7.90625		39.3525
1hr2	19.855		42.075		8.305		41.8			DD 1 hr 2	10.9725		41.7863		6.27		36.0525
1hr3	24.475		39.655		8.8		38.83			DD 1 hr 3	6.435		43.1888		5.8025		39.7238
av 1hr	21.7617	1.97047	40.205	1.35914	8.48833	0.221523	40.0033	1.29012		Av 1 hr	11.3712	4.20269	42.8038	0.726541	6.65958	0.901951	38.3762	1.65011

## Sheet: Zn and Pb exhaustion data
									mg removed			mg/g removed
Sample	Zn	Pb		L of mine water	g of WAS	mg of WAS	g/L minewater		Zn	Pb		Zn	Pb
Trib1 1	11.682	1.771
Trib1 2	12.287	1.76
Trib1 3	12.386	1.628
Trib1 Av	12.1183	1.71967
0.1g 1	0.11	0.044		0.04	0.1	0.0001	2.5		12.0083	1.67567		4.80333	0.670267
0.1g 2	0.154	0.055		0.04	0.1	0.0001	2.5		11.9643	1.66467		4.78573	0.665867
0.1g 3	0.121	0.044		0.04	0.1	0.0001	2.5		11.9973	1.67567		4.79893	0.670267
									11.99	1.71967		4.796	0.6688
0.05g 1	0.484	0.033		0.04	0.05	5e-05	1.25		11.6343	1.68667		9.30747	1.34933
0.05g 2	0.253	0.022		0.04	0.05	5e-05	1.25		11.8653	1.69767		9.49227	1.35813
0.05g 3	0.44	0.033		0.04	0.05	5e-05	1.25		11.6783	1.68667		9.34267	1.34933
									11.726	1.71967		9.3808	1.35227
0.03g 1	2.4	0.06		0.04	0.03	3e-05	0.75		9.71833	1.65967		12.9578	2.21289
0.03g 2	3.22	0.05		0.04	0.03	3e-05	0.75		8.89833	1.66967		11.8644	2.22622
0.03g 3	2.4	0.05		0.04	0.03	3e-05	0.75		9.71833	1.66967		12.9578	2.22622
									9.445	1.71967		12.5933	2.22178
0.02g 1	4.45	0.05		0.04	0.02	2e-05	0.5		7.66833	1.66967		15.3367	3.33933
0.02g 2	5.24	0.07		0.04	0.02	2e-05	0.5		6.87833	1.64967		13.7567	3.29933
0.02g 3	4.45	0.06		0.04	0.02	2e-05	0.5		7.66833	1.65967		15.3367	3.31933
									7.405	1.71967		14.81	3.31933
0.01g 1	9.658	0.088		0.04	0.01	1e-05	0.25		2.46033	1.63167		9.84133	6.52667
0.01g 2	8.712	0.066		0.04	0.01	1e-05	0.25		3.40633	1.65367		13.6253	6.61467
0.01g 3	8.25	0.066		0.04	0.01	1e-05	0.25		3.86833	1.65367		15.4733	6.61467
									3.245	1.71967		12.98	6.58533
0.006g 1	11.11	0.297		0.04	0.006	6e-06	0.15		1.00833	1.42267		6.72222	9.48444
0.006g 2	11.033	0.121		0.04	0.006	6e-06	0.15		1.08533	1.59867		7.23556	10.6578
0.006g 3	10.615	0.11		0.04	0.006	6e-06	0.15		1.50333	1.60967		10.0222	10.7311
									1.199	1.71967		7.99333	10.2911
0.003g 1	11.792	0.275		0.04	0.003	3e-06	0.075		0.326333	1.44467		4.35111	19.2622
0.003g 2	12.089	0.33		0.04	0.003	3e-06	0.075		0.0293333	1.38967		0.391111	18.5289
0.003g 3	12.265	0.396		0.04	0.003	3e-06	0.075		-0.146667	1.32367		-1.95556	17.6489
									0.0696667	1.71967		0.928889	18.48
0.002g 1		0.51		0.04	0.002	2e-06	0.05			1.20967			24.1933
0.002g 2		0.55		0.04	0.002	2e-06	0.05			1.16967			23.3933
0.002g 3		0.55		0.04	0.002	2e-06	0.05			1.16967			23.3933
										1.71967			23.66
0.002g 1		0.77		0.047	0.002	2e-06	0.0425532			0.949667			22.3172
0.002g 2		0.79		0.047	0.002	2e-06	0.0425532			0.929667			21.8472
0.002g 3		0.78		0.047	0.002	2e-06	0.0425532			0.939667			22.0822
													22.0822

## Sheet: PHREEQC inputs (exhaustion)
Trib 1	unit	mine water	0.1g	0.05g	0.03g	0.02g	0.01g	0.006g	0.003g
temp	°C	15.2	15.2	15.2	15.2	15.2	15.2	15.2	15.2
pH		6.5	8.52	8.34	7.97	7.92	7.64	7.63	7.61
pe		7.4	4	4	4	4	7.4	4	4
Al	ppb	72.7	72.7	72.7	72.7	72.7	72.7	72.7	72.7
Alkalinity		26	65	55	42	42	40	30	28
Ca	ppm	2.89	7.2	7.48	4.64	4.88	4.16	3.64	3.16
Cd	ppb	42.9	42.9	42.9	42.9	42.9	42.9	42.9	42.9
Cu	ppm	16.4	16.4	16.4	16.4	16.4	16.4	16.4	16.4
K	ppm	0.92	7.88	5.08	3.56	5.76	3.24	2.32	1.76
Mg	ppm	2.5	2.96	2.92	2.76	2.8	2.68	2.72	2.6
N(3)	ppm	0	0.04	0.04	0.04	0.04	0.04	0.04	0.04
N(5)	ppm	0	0.26	0.26	0.26	0.26	0.26	0.26	0.26
Na	ppm	2.95	11.04	7.96	5.96	7.76	6.2	5.08	4.24
P	ppm	0	0.34	0.34	0.34	0.34	0.34	0.34	0.34
Pb	ppm	1.7	1.72	1.72	1.72	1.72	1.72	1.72	1.72
S(6)	ppm	11	26.45	26.45	26.45	26.45	26.45	26.45	26.45
Zn	ppm	12.1	12.12	12.12	12.12	12.12	12.12	12.12	12.12

[truncated: 6 more sheets: PHREEQC outputs (exhaustion), Zn Pb removal corr with mobilit, Base cations (exhaustion), Zn Pb removal corr w base cat , FTIR (exhaustion), FTIR (contact time)]
