# Supplementary figures and images for: Treatment of mine water for the fast removal of zinc and lead by wood ash amended biochar
Source: Royal Society of Chemistry journal article supplement (doi:10.1039/d2va00085g), 2022-01-01

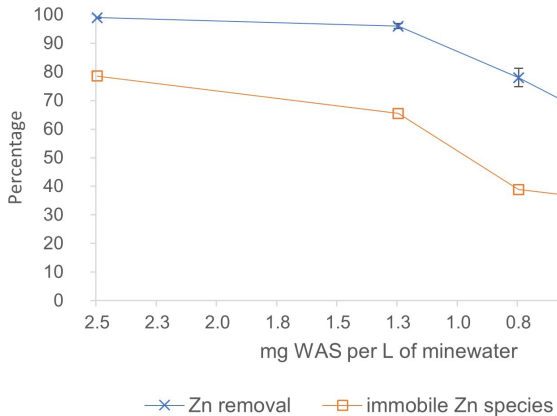

Supplement: d2va00085g3.pdf [file d2va00085g3.pdf]
